# Supplementary material for: Synthesis of highly enantio-enriched stereoisomers of hydroxy-GR24
Source: Royal Society of Chemistry journal article supplement (doi:10.1039/c5ob02349a), 2015-12-15
Supplement: c5ob02349a1.pdf [file c5ob02349a1.pdf]

**Supporting information  
for**

**Synthesis of Highly Enantio-enriched Stereoisomers of  
Hydroxy-GR24**

J. C. Morris and C. S. P. McErlean

|                                     |              |            |
|-------------------------------------|--------------|------------|
| <b>General experimental details</b> | <b>.....</b> | <b>S2</b>  |
| <b>Experimental details</b>         | <b>.....</b> | <b>S3</b>  |
| <b>Enantioselective HPLC traces</b> | <b>.....</b> | <b>S7</b>  |
| <b>Racemisation studies</b>         | <b>.....</b> | <b>S13</b> |
| <b>CD spectra</b>                   | <b>.....</b> | <b>S15</b> |
| <b>References</b>                   | <b>.....</b> | <b>S16</b> |
| <b>NMR spectra</b>                  | <b>.....</b> | <b>S17</b> |

## General experimental

Reagent grade dichloromethane and triethylamine were freshly distilled from calcium hydride. Tetrahydrofuran and methanol were collected using an Innovative Technology Inc. PureSolv™ solvent purification system. All other solvents and reagents were used as received from commercial sources. Melting points were determined using a Stanford Research Systems Optimelt automated melting point system and are uncorrected. Infrared spectra were acquired neat on a Bruker Alpha-E ATR spectrometer.  $^1\text{H}$  and  $^{13}\text{C}$  NMR spectra were recorded on a Bruker AVANCE DPX300 ( $^1\text{H}$  frequency 300 MHz;  $^{13}\text{C}$  frequency 75 MHz) or Bruker AVANCE DPX500 ( $^1\text{H}$  frequency 500 MHz;  $^{13}\text{C}$  frequency 125 MHz).  $^1\text{H}$  chemical shifts are expressed as parts per million (ppm) with residual chloroform ( $\delta$  7.26) or tetramethylsilane ( $\delta$  0.00) as reference and are reported as chemical shift ( $\delta_{\text{H}}$ ); relative integral; multiplicity (s = singlet, br = broad, d = doublet, t = triplet, dd = doublet of doublets, dt = doublet of triplets, m = multiplet); and coupling constants ( $J$ ) reported in Hz.  $^{13}\text{C}$  NMR chemical shifts are expressed as parts per million (ppm) with deuteriochloroform ( $\delta$  77.16) as internal reference and are reported as chemical shift ( $\delta_{\text{C}}$ ); multiplicity (assigned from DEPT experiments). High resolution mass spectra were recorded on a Bruker ApexII Fourier Transform Ion Cyclotron Resonance mass spectrometer with a 7.0 T magnet, fitted with an off-axis Analytical electrospray source. Enantioselective HPLC analyses were performed using an AD-H column (25%  $i$ PrOH in hexanes, 0.5 mLmin $^{-1}$ ) with a dual  $\lambda$  absorbance detector (254 and 270 nm). Column chromatography was performed using Grace Davidson 40-63  $\mu\text{m}$  (230-400 mesh) silica gel using distilled solvents. Analytical thin layer chromatography was performed using preconditioned plates (Merck TLC silica gel 60 F254 on aluminium) and visualised using UV light (254 nm and 365 nm) and ethanolic anisaldehyde.

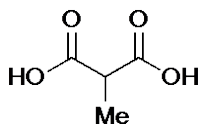

**Methyl malonic acid.** To a solution of aqueous KOH (5 M, 400 mL) at 0 °C was added diethyl methylmalonate (39.1 mL, 0.23 mol) and the reaction mixture was allowed to warm to room temperature. After 60 h, the reaction mixture was washed with Et<sub>2</sub>O (2 × 100 mL) and the aqueous layer was acidified with HCl (6 M; 400 mL). After addition was complete the aqueous layer was extracted with ethyl acetate (7 × 200 mL) and the combined organic extracts were dried (Na<sub>2</sub>SO<sub>4</sub>) and concentrated *in vacuo* to provide methyl malonic acid (19.2 g, 71%) as a white solid, without the need for further purification. mp 134 °C, lit.<sup>[1]</sup> mp 134 °C; <sup>1</sup>H NMR (300 MHz, DMSO) δ 12.6 (2H, br s, CO<sub>2</sub>H), 3.30 (1H, q, *J* = 7.2 Hz, CHCO<sub>2</sub>H), 1.21 (3H, d, *J* = 7.2 Hz, CH<sub>3</sub>CHCO<sub>2</sub>H); <sup>13</sup>C NMR (75 MHz, DMSO) δ 171.9, 45.9, 13.9.

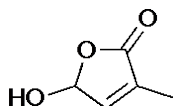

**5-Hydroxy-3-methylfuran-2(5H)-one.** To a solution of glyoxal (7.98 g, 40 wt % in H<sub>2</sub>O, 54.1 mmol) in H<sub>2</sub>O (45 mL) at room temperature was added methyl malonic acid (4.50 g, 38.8 mmol) followed by addition of H<sub>2</sub>SO<sub>4</sub> (10 drops) and the reaction mixture was heated at reflux. After 16 h, the reaction was saturated with solid NaCl and the aqueous was extracted with ethyl acetate (3 × 25 mL). The combined organic extracts were dried (Na<sub>2</sub>SO<sub>4</sub>), filtered and concentrated *in vacuo*. Purification by flash column chromatography (40% ethyl acetate/Pet. Ether) gave butenolide (2.27 g, 52%) as an orange/yellow solid. m.p 56.7–60.1 °C, lit.<sup>[2]</sup> mp 69–71 °C; <sup>1</sup>H NMR (300 MHz, CDCl<sub>3</sub>): δ 6.88 (1 H, m, H<sub>3</sub>), 6.08 (1 H, m, H<sub>2</sub>), 3.35 (1 H, br, OH), 1.96 (3 H, m, H<sub>7</sub>); <sup>13</sup>C NMR (100 MHz, CDCl<sub>3</sub>) δ 172.8, 144.7, 133.6, 97.0, 10.4.

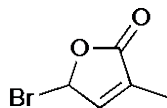

**Bromobutenolide 17.** To a solution of butenolide (0.394 g, 3.45 mmol) in CH<sub>2</sub>Cl<sub>2</sub> (15 mL) at 0 °C was added carbon tetrabromide (1.36 g, 4.14 mmol) followed by portionwise addition of triphenylphosphine (1.11 g, 4.14 mmol) with warming to room temperature. After 2.5 h, the reaction mixture was concentrated *in vacuo*. Purification by flash column chromatography (15–20% ethyl acetate/Pet. Ether) gave compound **17** (0.354 g, 58%) as a yellow oil. IR (neat) 3104, 1768, 1211, 1031, 945 cm<sup>-1</sup>; <sup>1</sup>H NMR (300 MHz, CDCl<sub>3</sub>) δ 7.20 (1 H, s, H<sub>3</sub>), 6.83 (1 H, s, H<sub>2</sub>), 2.01 (3 H, s, H<sub>7</sub>); <sup>13</sup>C NMR (75 MHz, CDCl<sub>3</sub>) δ 170.7, 147.4, 130.8, 74.8, 10.5.

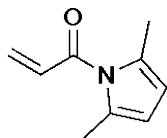

**N-Acryloylpyrrole 15.** To a solution of acrylamide (1.05 g, 14.8 mmol) in toluene (120 mL) at room temperature was added 2,5-hexanedione (0.5 mL, 4.27 mmol) followed by *p*-toluenesulfonic acid (89.5 mg, 0.53 mmol) and the reaction mixture heated to reflux under Dean-Stark conditions. After 16 h, the reaction mixture was cooled to room temperature and the organics washed with H<sub>2</sub>O (3×50 mL). The organic extract was dried (Na<sub>2</sub>SO<sub>4</sub>), filtered and concentrated *in vacuo*. Purification by flash column chromatography (5% Et<sub>2</sub>O/Pet. Ether) afforded **15** (0.427 g, 67%) as a yellow oil. IR (neat) 2926, 1693, 1539, 1403, 1363, 1300, 1258, 1073, 1044 cm<sup>-1</sup>; <sup>1</sup>H NMR (500 MHz, CDCl<sub>3</sub>) δ 6.69 (1H, dd, *J* = 17.0, 10.3 Hz, H<sub>2</sub>), 6.47 (1H, dd, *J* = 17.0, 1.4 Hz, H<sub>3a</sub>), 5.95 (1H, dd, *J* = 10.4, 1.4 Hz, H<sub>3b</sub>), 5.85 (2H, s, H<sub>3'-4'</sub>), 2.35 (6H, s, H<sub>6'-7'</sub>); <sup>13</sup>C NMR (75 MHz, CDCl<sub>3</sub>) δ 167.0, 132.1, 131.2, 130.1, 111.0, 15.6.

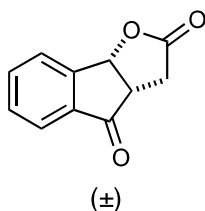

**Lactone (±)-6.** To a solution of thiazolium catalyst **16** (0.263 g, 0.975 mmol) in degassed THF (20 mL) at room temperature was added Cs<sub>2</sub>CO<sub>3</sub> (0.315 g, 0.975 mmol) and the solution was degassed for a further 10 min until the solution turned pale yellow. To a separate flask containing phthalaldehyde (1.29 g, 9.75 mmol) in THF (20 mL) at room temperature was added a solution of **15** (0.728 g, 4.88 mmol) in THF (5 mL) and the solution degassed for 5 min. Following degassing, the solution was added *via* cannula to the carbene reaction flask. After 2.5 h, a further portion of Cs<sub>2</sub>CO<sub>3</sub> (1.59 g, 4.88 mmol) was added and the reaction mixture was stirred at room temperature for 16 h. The reaction mixture was quenched by addition of saturated aqueous NH<sub>4</sub>Cl (10 mL) and the organics extracted with ethyl acetate (3×25 mL). The combined organic extracts were washed with brine (25 mL), dried (Na<sub>2</sub>SO<sub>4</sub>), filtered and concentrated *in vacuo*. Purification by flash column chromatography (20–25% ethyl acetate/Pet. Ether then 2% ethyl acetate/CH<sub>2</sub>Cl<sub>2</sub>) afforded lactone **6** (0.352 g, 38%) as a pale orange solid. mp 109.9–112.2 °C, lit.<sup>[3]</sup> mp 113.5–114 °C; IR (neat) 1770, 1717 cm<sup>-1</sup>; <sup>1</sup>H NMR (400 MHz, CDCl<sub>3</sub>) δ 7.91–7.76 (3H, m, ArH), 7.64–7.60 (1H, m, ArH), 6.01 (1H, d, *J* = 6.8 Hz, H<sub>8b</sub>), 3.59 (1H, ddd, *J* = 12.5, 6.8, 4.5 Hz, H<sub>3a</sub>), 3.09 (1H, dd, *J* = 19.0, 12.5 Hz, H<sub>3</sub>), 2.80 (1H, dd, *J* = 19.0, 4.5 Hz, H<sub>3</sub>); <sup>13</sup>C NMR (100 MHz, CDCl<sub>3</sub>) δ 202.4, 174.7, 149.7, 136.2, 136.1, 131.2, 127.6, 124.5, 79.1, 45.8, 31.2.

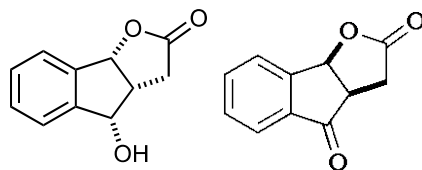

**Alcohol (-)-7.** To a solution of lactone (±)-**6** (201 mg, 1.07 mmol) in DMF (1.6 mL) at 0 °C was added (*S,S*)-RuTsDPEN (25 mg, 0.043 mmol) followed by the slow simultaneous addition of formic acid (0.2 mL, 5.34 mmol) and Hünig's base (0.37 mL, 2.14 mmol). After 6 h, the reaction mixture was quenched by addition of 1M HCl (5 mL) and the organics were extracted with ethyl acetate (3×10 mL). The combined organic extracts were washed with brine (10 mL), dried (Na<sub>2</sub>SO<sub>4</sub>), filtered and concentrated *in vacuo*. Purification by flash column chromatography (2, 5, 10% ethyl acetate/CH<sub>2</sub>Cl<sub>2</sub>) gave alcohol (-)-**7** (98.8 mg, 49%) as an off white solid. mp 139.5–142.7 °C, lit.<sup>[3]</sup> mp 154.3–154.8 °C; [ $\alpha$ ]<sub>D</sub><sup>20</sup> -44.7 (*c* 0.51, CHCl<sub>3</sub>); IR (neat) 3430, 1759 cm<sup>-1</sup>; <sup>1</sup>H NMR (400 MHz, CDCl<sub>3</sub>) δ 7.52–7.38 (4H, m, ArH), 5.70 (1H, d, *J* = 7.1 Hz, H<sub>8b</sub>), 5.25 (1H, d, *J* = 7.2 Hz, H<sub>4</sub>), 3.51–3.43 (1H, m, H<sub>3a</sub>), 2.84 (1H, dd, *J* = 18.4, 5.8 Hz, H<sub>3</sub>), 2.63 (1H, dd, *J* = 18.4, 10.3 Hz, H<sub>3</sub>), 2.55 (1H, br s, OH); <sup>13</sup>C NMR (100 MHz, CDCl<sub>3</sub>) δ 177.3, 144.2, 138.2, 130.5, 129.6, 126.3, 125.3, 84.3, 73.4, 43.4, 28.8; HRMS (ES<sup>+</sup>) Calc for C<sub>11</sub>H<sub>10</sub>O<sub>3</sub>Na [M+Na]<sup>+</sup> 213.05222, found 213.05225.

and enantio-enriched ketone (+)-**6** (98.8 mg, 49%) as a yellow/brown solid: mp 90.5–95.3 °C, lit.<sup>[3]</sup> mp 113.5–114 °C; [ $\alpha$ ]<sub>D</sub><sup>20</sup> +21.7 (*c* 1.07, CHCl<sub>3</sub>); IR (neat) 1772, 1719 cm<sup>-1</sup>; <sup>1</sup>H NMR (400 MHz, CDCl<sub>3</sub>) δ 7.84–7.74 (3H, m, ArH), 7.64–7.59 (1H, m, ArH), 6.00 (1H, d, *J* = 6.8 Hz, H<sub>8b</sub>), 3.57 (1H, ddd, *J* = 12.5, 6.8, 4.5 Hz, H<sub>3a</sub>), 3.06 (1H, dd, *J* = 19.0, 12.5 Hz, H<sub>3</sub>), 2.78 (1H, dd, *J* = 19.0, 4.5 Hz, H<sub>3</sub>); <sup>13</sup>C NMR (100 MHz, CDCl<sub>3</sub>) δ 202.4, 174.7, 149.7, 136.2, 136.1, 131.1, 127.6, 124.4, 79.1, 45.8, 31.1.

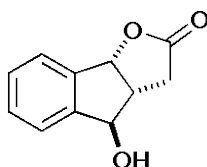

**Alcohol (–)-8.** To a solution of alcohol (–)-7 (45.2 mg, 0.238 mmol) in THF (3 mL) at 0 °C was added PPh<sub>3</sub> (232 mg, 0.88 mmol) and benzoic acid (108.1 mg, 0.88 mmol) followed by slow addition of DIAD (0.17 mL, 0.856 mmol). After 16 h, the reaction mixture was concentrated *in vacuo*. Purification by flash column chromatography (15% ethyl acetate/Pet. Ether) provided semi-crude benzoic ester. To a solution of benzoic ester in MeOH (2 mL) at room temperature was added K<sub>2</sub>CO<sub>3</sub> (48.1 mg, 0.333 mmol). After 3 h, the reaction mixture was quenched by addition of 1M HCl (5 mL) and the organics were extracted with ethyl acetate (3×5 mL). The combined organic extracts were washed with brine (10 mL), dried (Na<sub>2</sub>SO<sub>4</sub>), filtered and concentrated *in vacuo*. Purification by flash column chromatography (40–60% ethyl acetate/Pet. Ether) gave alcohol (–)-8 (37.6 mg, 83% over two-steps) as a colourless oil.  $[\alpha]_D^{20}$  –80.0 (*c* 0.96, CHCl<sub>3</sub>); IR (neat) 3396, 1767 cm<sup>–1</sup>; <sup>1</sup>H NMR (400 MHz, CDCl<sub>3</sub>) δ 7.52–7.41 (4H, m, ArH), 6.02 (1H, d, *J* = 7.0 Hz, H<sub>8b</sub>), 5.13 (1H, d, *J* = 2.1 Hz, H<sub>4</sub>), 3.23 (1H, dddd, *J* = 10.4, 6.9, 6.0, 2.4 Hz, H<sub>3a</sub>), 2.93 (1H, dd, *J* = 18.4, 10.5 Hz, H<sub>3</sub>), 2.43 (1H, dd, *J* = 18.4, 5.9 Hz, H<sub>3</sub>); <sup>13</sup>C NMR (100 MHz, CDCl<sub>3</sub>) δ 176.3, 143.9, 138.9, 130.7, 130.1, 126.6, 125.4, 85.8, 80.4, 47.9, 33.0; MS (ESI) *m/z* 212 ([M + Na]<sup>+</sup>, 46), 403 ([2M + Na]<sup>+</sup>, 100).

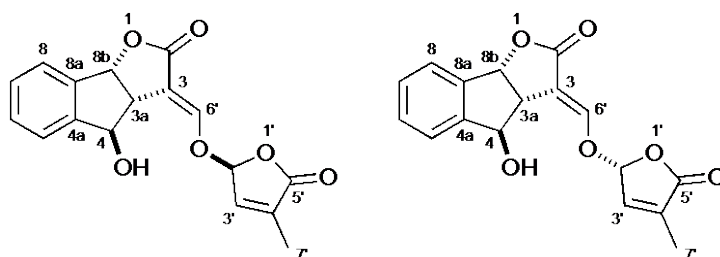

**(–)-4-OH-*epi*-GR24 (–)-4 and (–)-4-OH-GR24.** To a solution of alcohol (–)-8 (33.4 mg, 0.176 mmol) in neat methyl formate (2 mL) was added at 0 °C potassium *tert*-butoxide (119.1 mg, 1.05 mmol) portion wise and the reaction allowed to warm to room temperature. After 3 h (starting material consumption indicated by TLC analysis), the reaction mixture was quenched by the addition of 1M HCl (5 mL) and the organics extracted with ethyl acetate (3×5 mL). The combined organic extracts were washed with brine (5 mL), dried (Na<sub>2</sub>SO<sub>4</sub>), filtered and concentrated *in vacuo*. The crude enol product was taken up in DMF (1.5 mL) and K<sub>2</sub>CO<sub>3</sub> (36.6 mg, 0.264 mmol) was added at room temperature. The reaction mixture was cooled to 0 °C and a solution of bromobutenolide **17** (50.8 mg, 0.287 mmol) in DMF (0.5 mL) was added *via* cannula. After 16 h, the reaction mixture was quenched by addition of saturated aqueous NH<sub>4</sub>Cl (5 mL) and the organics extracted with ethyl acetate (4×5 mL). The combined organic extracts were washed with a H<sub>2</sub>O:brine mixture (1:1, 10 mL), washed with brine (10 mL), dried (Na<sub>2</sub>SO<sub>4</sub>), filtered and concentrated *in vacuo*. Purification by flash column chromatography (60% ethyl acetate/Pet. Ether) provided a mixture of (–)-4 (11.7 mg, 21%) as a white solid. mp 81.5–82.9 °C;  $[\alpha]_D^{20}$  –254 (*c* 0.39, CHCl<sub>3</sub>); IR (thin film) 3411, 1781, 1746, 1679 cm<sup>–1</sup>; <sup>1</sup>H NMR (400 MHz, CDCl<sub>3</sub>) δ 7.54–7.51 (2H, m, H<sub>6'</sub> + ArH), 7.45–7.40 (3H, m, ArH), 6.98 (1H, t, *J* = 1.6 Hz, H<sub>3</sub>), 6.23 (1H, t, *J* = 1.4 Hz, H<sub>2</sub>), 6.06 (1H, d, *J* = 7.4 Hz, H<sub>8b</sub>), 5.32 (1H, br s, H<sub>4</sub>), 3.81 (1H, ddd, *J* = 7.5, 2.6, 2.0 Hz, H<sub>3a</sub>), 2.03 (3H, t, *J* = 1.5 Hz, H<sub>7</sub>); <sup>13</sup>C NMR (100 MHz, CDCl<sub>3</sub>) δ 170.6, 169.9, 151.5, 143.9, 140.8, 139.3, 136.4, 130.7, 130.1, 126.6, 125.5, 110.4, 100.4, 84.1, 79.8, 50.6, 10.7; HRMS (ES<sup>+</sup>) Calc for C<sub>17</sub>H<sub>14</sub>O<sub>6</sub>Na [M+Na]<sup>+</sup> 337.06826, found 337.06861.

and (–)-4-OH-*epi*-GR24 (10.6 mg, 19%) as a white solid. mp 164.7–170.2 °C;  $[\alpha]_D^{20}$  –185 (*c* 0.37, CHCl<sub>3</sub>); IR (thin film) 3418, 1780, 1743, 1675 cm<sup>–1</sup>; <sup>1</sup>H NMR (400 MHz, CDCl<sub>3</sub>) δ 7.55–7.51 (2H, m, H<sub>6'</sub> + ArH), 7.45–7.40 (3H, m, ArH), 6.98 (1H, t, *J* = 1.6 Hz, H<sub>3</sub>), 6.21 (1H, t, *J* = 1.4 Hz, H<sub>2</sub>), 6.07 (1H, d, *J* = 7.5 Hz, H<sub>8b</sub>), 5.30 (1H, br s, H<sub>4</sub>), 3.82 (1H, ddd, *J* = 7.5, 2.6, 1.9 Hz, H<sub>3a</sub>), 2.04 (3H, t, *J* = 1.5 Hz, H<sub>7</sub>); <sup>13</sup>C NMR (100 MHz, CDCl<sub>3</sub>) δ 170.6, 170.0, 151.9, 143.9, 140.9, 139.2, 136.1, 130.7, 130.1, 126.6, 125.6, 110.3, 100.7, 84.1, 79.7, 50.5, 10.7; HRMS (ES<sup>+</sup>) Calc for C<sub>17</sub>H<sub>14</sub>O<sub>6</sub>Na [M+Na]<sup>+</sup> 337.06826, found 337.06856.

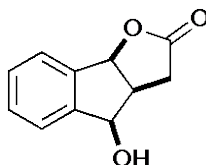

**Alcohol (+)-7.** To a solution of lactone (+)-6 (23.7 mg, 0.126 mmol) in EtOH (1 mL) at 0 °C was added  $\text{CeCl}_3 \cdot 7\text{H}_2\text{O}$  (46.3 mg, 0.126 mmol) followed by slow addition of  $\text{NaBH}_4$  (5.40 mg, 0.143 mmol). After 30 min, the reaction mixture was quenched by addition of 1M HCl (2 mL) and the organics were extracted with  $\text{CH}_2\text{Cl}_2$  (3×5 mL). The combined organic extracts were washed with brine (5 mL), dried ( $\text{Na}_2\text{SO}_4$ ), filtered and concentrated *in vacuo*. Purification by flash column chromatography (5% ethyl acetate/ $\text{CH}_2\text{Cl}_2$ ) provided alcohol (+)-7 (16.3 mg, 68%) as a white solid. mp 136.7–141.9 °C, lit.<sup>[3]</sup> mp 154.3–154.8 °C;  $[\alpha]_{\text{D}}^{20} +52.9$  (c 1.21,  $\text{CHCl}_3$ ); IR (neat) 3443, 1759  $\text{cm}^{-1}$ ;  $^1\text{H}$  NMR (400 MHz,  $\text{CDCl}_3$ )  $\delta$  7.52–7.39 (4H, m, ArH), 5.70 (1H, d,  $J = 7.1$  Hz,  $\text{H}_{8\text{b}}$ ), 5.27 (1H, d,  $J = 7.2$  Hz,  $\text{H}_4$ ), 3.48 (1H, dtd,  $J = 10.3, 7.1, 5.9$  Hz,  $\text{H}_{3\text{a}}$ ), 2.84 (1H, dd,  $J = 18.4, 5.9$  Hz,  $\text{H}_3$ ), 2.64 (1H, dd,  $J = 18.4, 10.3$  Hz,  $\text{H}_3$ );  $^{13}\text{C}$  NMR (100 MHz,  $\text{CDCl}_3$ )  $\delta$  177.2, 144.1, 138.2, 130.5, 129.6, 126.3, 125.2, 84.3, 73.4, 43.4, 28.8; MS (ESI)  $m/z$  212 ( $[\text{M} + \text{Na}]^+$ , 46), 403 ( $[2\text{M} + \text{Na}]^+$ , 100).

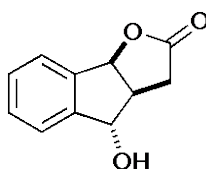

**Alcohol (+)-8.** To a solution of alcohol (+)-7 (37.5 mg, 0.197 mmol) in THF (1.5 mL) at 0 °C was added  $\text{PPh}_3$  (191.5 mg, 0.73 mmol) and benzoic acid (93.5 mg, 0.766 mmol) followed by slow addition of DIAD (0.14 mL, 0.71 mmol). After 16 h, the reaction mixture was concentrated *in vacuo*. Purification by flash column chromatography (15% ethyl acetate/Pet. Ether) provided semi-crude benzoic ester. To a solution of benzoic ester in MeOH (2 mL) at room temperature was added  $\text{K}_2\text{CO}_3$  (42.2 mg, 0.305 mmol). After 3 h, the reaction mixture was quenched by addition of 1M HCl (2 mL) and the organics were extracted with ethyl acetate (3×5 mL). The combined organic extracts were washed with brine (5 mL), dried ( $\text{Na}_2\text{SO}_4$ ), filtered and concentrated *in vacuo*. Purification by flash column chromatography (40–60% ethyl acetate/Pet. Ether) gave alcohol (+)-8 (31.1 mg, 83% over two-steps) as a colourless oil.  $[\alpha]_{\text{D}}^{20} +82.9$  (c 0.99,  $\text{CHCl}_3$ ); IR (neat) 3376, 1755  $\text{cm}^{-1}$ ;  $^1\text{H}$  NMR (500 MHz,  $\text{CDCl}_3$ )  $\delta$  7.49–7.40 (4H, m, ArH), 5.99 (1H, d,  $J = 6.9$  Hz,  $\text{H}_{8\text{b}}$ ), 5.09 (1H, d,  $J = 1.9$  Hz,  $\text{H}_4$ ), 3.22–3.17 (1H, m,  $\text{H}_{3\text{a}}$ ), 2.90 (1H, dd,  $J = 18.4, 10.4$  Hz,  $\text{H}_3$ ), 2.41 (1H, dd,  $J = 18.4, 5.8$  Hz,  $\text{H}_3$ );  $^{13}\text{C}$  NMR (125 MHz,  $\text{CDCl}_3$ )  $\delta$  176.4, 143.9, 138.8, 130.7, 130.0, 126.5, 125.4, 85.9, 80.3, 47.9, 33.0; HRMS ( $\text{ES}^+$ ) Calc for  $\text{C}_{11}\text{H}_{10}\text{O}_3\text{Na}$   $[\text{M} + \text{Na}]^+$  213.05222, found 213.05244.

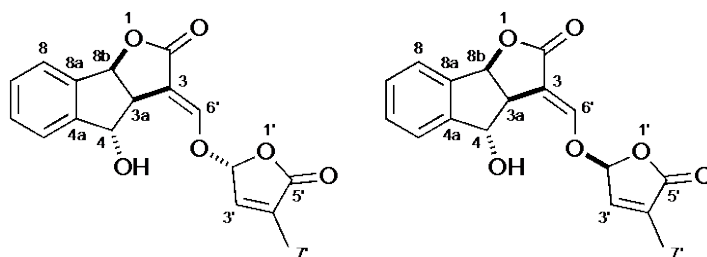

**(+)-4-OH-GR24 (+)-4 and (+)-4-OH-epi-GR24.** To a solution of alcohol (+)-8 (28.4 mg, 0.149 mmol) in neat methyl formate (2 mL) was added at 0 °C potassium *tert*-butoxide (99.9 mg, 0.897 mmol) portion wise and the reaction allowed to warm to room temperature. After 3 h (starting material consumption indicative by TLC analysis), the reaction mixture was quenched by the addition of 1M HCl (5 mL) and the organics extracted with ethyl acetate (3 × 5 mL). The combined organic extracts were washed with

brine, dried (Na<sub>2</sub>SO<sub>4</sub>), filtered and concentrated *in vacuo*. The crude enol product was taken up in DMF (1.5 mL) and K<sub>2</sub>CO<sub>3</sub> (34.6 mg, 0.250 mmol) was added at room temperature. The reaction mixture was cooled to 0 °C and a solution of bromobutenolide **17** (39.9 mg, 0.224 mmol) in DMF (0.5 mL) was added *via* cannula. After 16 h, the reaction mixture was quenched by addition of saturated aqueous NH<sub>4</sub>Cl (5 mL) and the organics extracted with ethyl acetate (4 × 5 mL). The combined organic extracts were washed with a H<sub>2</sub>O:brine mixture (1:1, 5 mL), washed with brine (5 mL), dried (Na<sub>2</sub>SO<sub>4</sub>), filtered and concentrated *in vacuo*. Purification by flash column chromatography (60% ethyl acetate/Pet. Ether) provided a mixture of (+)-**4** (12.2 mg, 26%) as a white solid. mp 77.8–85.6 °C; [ $\alpha$ ]<sub>D</sub><sup>20</sup> +299 (*c* 0.41, CHCl<sub>3</sub>); IR (thin film) 3426, 1779, 1745, 1675 cm<sup>-1</sup>; <sup>1</sup>H NMR (400 MHz, CDCl<sub>3</sub>)  $\delta$  7.54–7.52 (1H, m, ArH), 7.53 (1H, d, *J* = 2.6 Hz, H<sub>6</sub>), 7.46–7.41 (3H, m, ArH), 7.00–6.98 (1H, m, H<sub>3</sub>), 6.23 (1H, t, *J* = 1.4 Hz, H<sub>2</sub>), 6.07 (1H, d, *J* = 7.5 Hz, H<sub>8b</sub>), 5.32 (1H, d, *J* = 3.5 Hz, H<sub>4</sub>), 3.82 (1H, ddd, *J* = 7.5, 2.6, 1.9 Hz, H<sub>3a</sub>), 2.30 (1H, br s, OH), 2.04 (3H, t, *J* = 1.5 Hz, H<sub>7</sub>); <sup>13</sup>C NMR (100 MHz, CDCl<sub>3</sub>)  $\delta$  170.7, 170.0, 151.6, 143.8, 140.8, 139.2, 136.4, 130.7, 130.2, 126.6, 125.5, 110.2, 100.4, 84.1, 79.7, 50.5, 10.8; HRMS (ES<sup>+</sup>) Calc for C<sub>17</sub>H<sub>14</sub>O<sub>6</sub>Na [M+Na]<sup>+</sup> 337.06826, found 337.06847.

and (+)-**4-OH-epi-GR24** (12.8 mg, 27%) as a white solid. mp 163.1–168.9 °C; [ $\alpha$ ]<sub>D</sub><sup>20</sup> +186 (*c* 0.29, CHCl<sub>3</sub>); IR (thin film) 3432, 1780, 1744, 1675 cm<sup>-1</sup>; <sup>1</sup>H NMR (400 MHz, CDCl<sub>3</sub>)  $\delta$  7.55 (1H, d, *J* = 2.7 Hz, H<sub>6</sub>), 7.54–7.51 (1H, m, ArH), 7.46–7.40 (3H, m, ArH), 7.00–6.98 (1H, m, H<sub>3</sub>), 6.22 (1H, t, *J* = 1.4 Hz, H<sub>2</sub>), 6.08 (1H, d, *J* = 7.5 Hz, H<sub>8b</sub>), 5.30 (1H, d, *J* = 2.2 Hz, H<sub>4</sub>), 3.82 (1H, ddd, *J* = 7.5, 2.7, 1.8 Hz, H<sub>3a</sub>), 2.30 (1H, br s, OH), 2.04 (3H, t, *J* = 1.5 Hz, H<sub>7</sub>); <sup>13</sup>C NMR (100 MHz, CDCl<sub>3</sub>)  $\delta$  170.7, 170.1, 152.0, 143.8, 140.9, 139.2, 136.1, 130.7, 130.1, 126.5, 125.6, 110.1, 100.7, 84.1, 79.6, 50.4, 10.8; HRMS (ES<sup>+</sup>) Calc for C<sub>17</sub>H<sub>14</sub>O<sub>6</sub>Na [M+Na]<sup>+</sup> 337.06826, found 337.06857.

Enantioselective HPLC traces

| Retention Time (min) | Purity1 Angle | Purity1 Threshold | PDA/FLR Match1 Spect. Name | PDA/FLR Match1 Angle | PDA/FLR Match1 Threshold | PDA/FLR Match1 Lib. Name | Area (μV*sec) | % Area | Height (μV) | Int Typ |
|----------------------|---------------|-------------------|----------------------------|----------------------|--------------------------|--------------------------|---------------|--------|-------------|---------|
| 16.431               |               |                   |                            |                      |                          |                          | 1961247       | 6.93   | 112506      | bb      |
| 17.181               |               |                   |                            |                      |                          |                          | 26348665      | 93.07  | 1275015     | VB      |
|                      |               |                   |                            |                      |                          |                          |               |        |             |         |

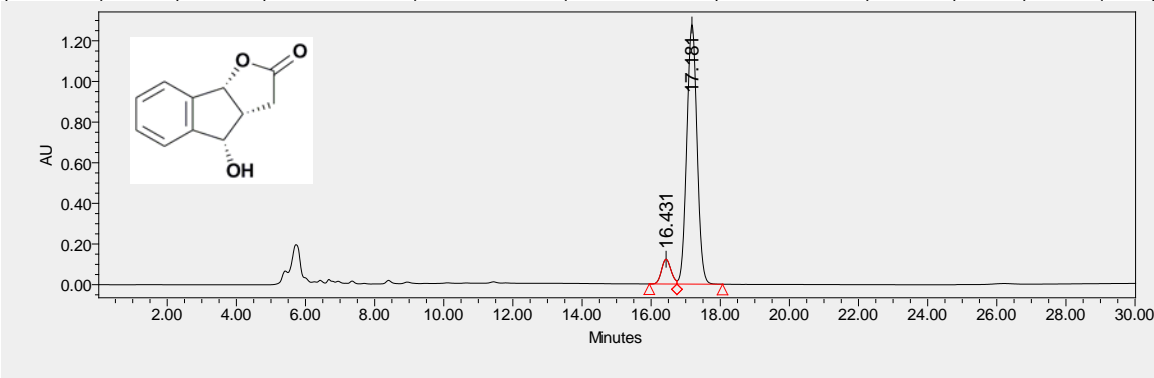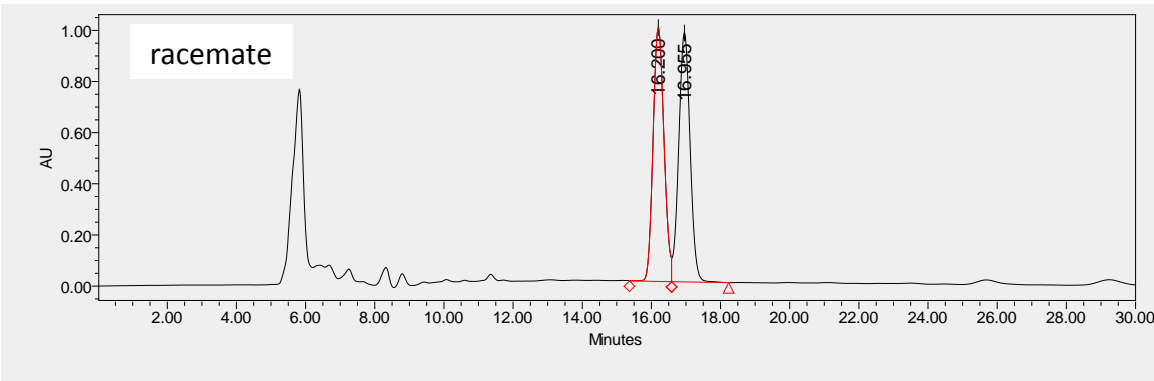



| Retention Time (min) | Purity1 Angle | Purity1 Threshold | PDA/FLR Match1 Spect. Name | PDA/FLR Match1 Angle | PDA/FLR Match1 Threshold | PDA/FLR Match1 Lib. Name | Area (μV <sup>2</sup> sec) | % Area | Height (μV) | Int Type | Amount | Units | Peak Type | Peak Codes |
|----------------------|---------------|-------------------|----------------------------|----------------------|--------------------------|--------------------------|----------------------------|--------|-------------|----------|--------|-------|-----------|------------|
| 15.896               |               |                   |                            |                      |                          |                          | 2642376                    | 96.98  | 139858      | BB       |        |       | Unknown   |            |
| 19.366               |               |                   |                            |                      |                          |                          | 82368                      | 3.02   | 3865        | BB       |        |       | Unknown   |            |

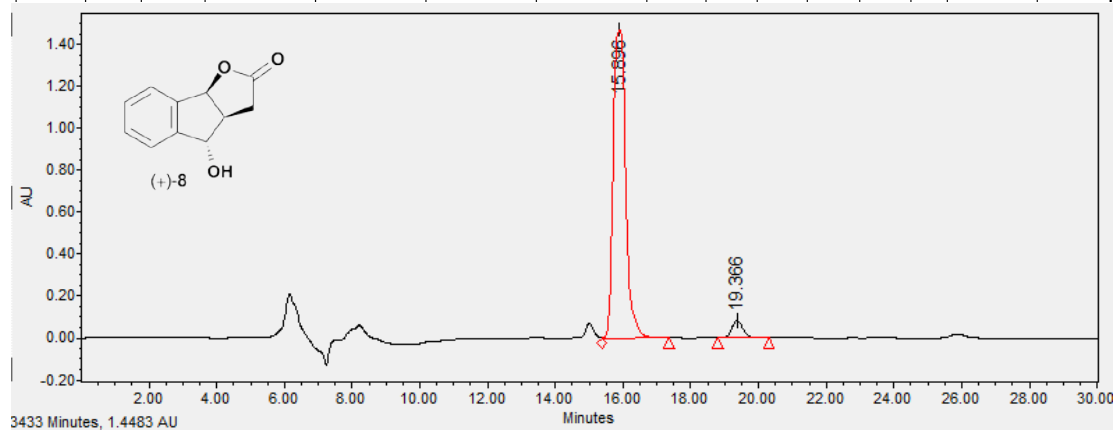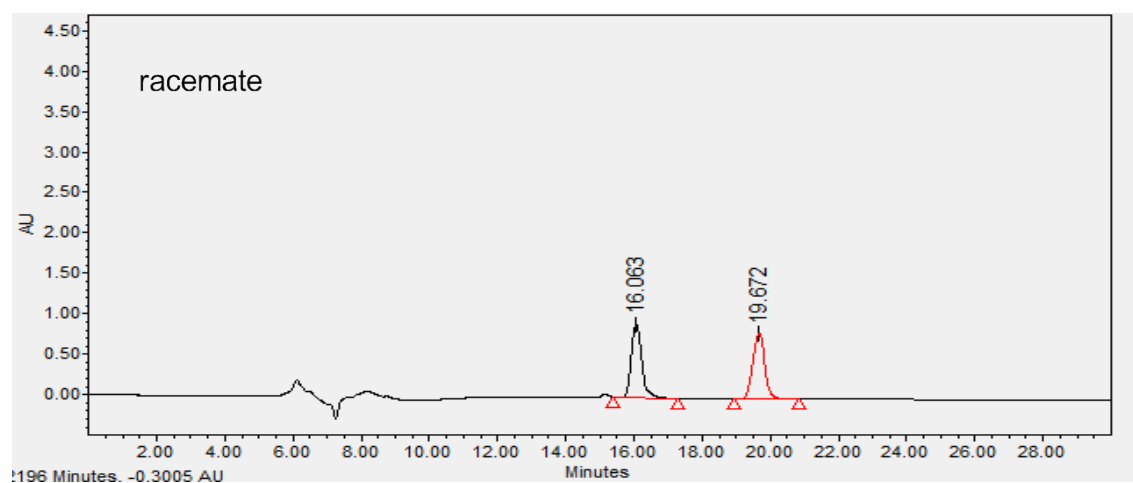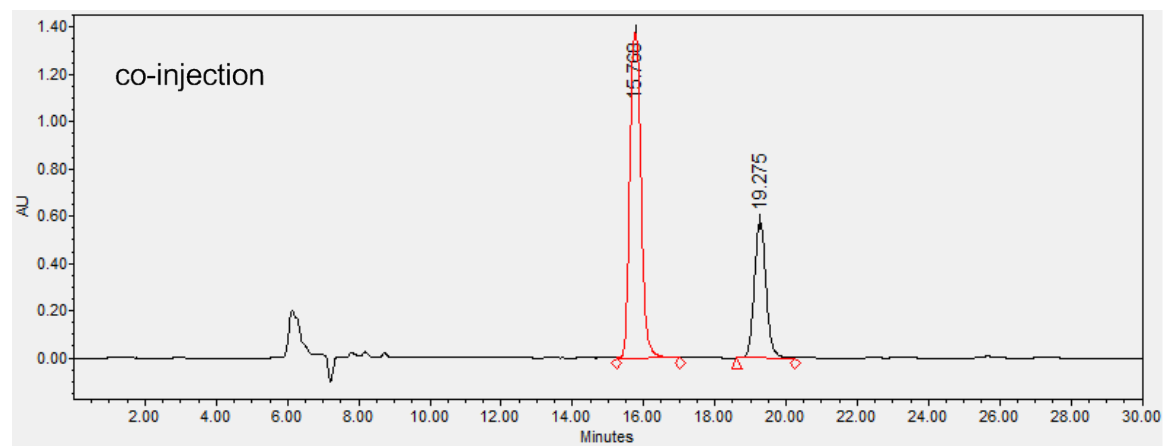

## Enantioselective HPLC traces

[illegible]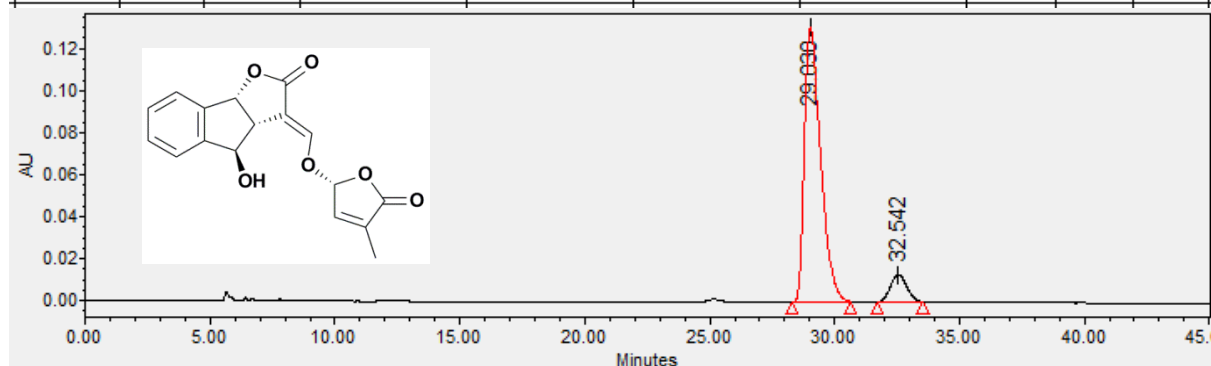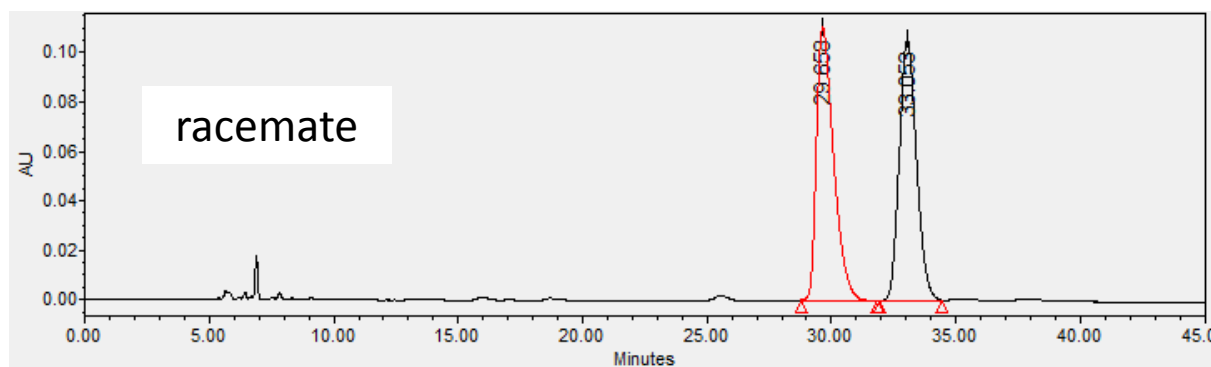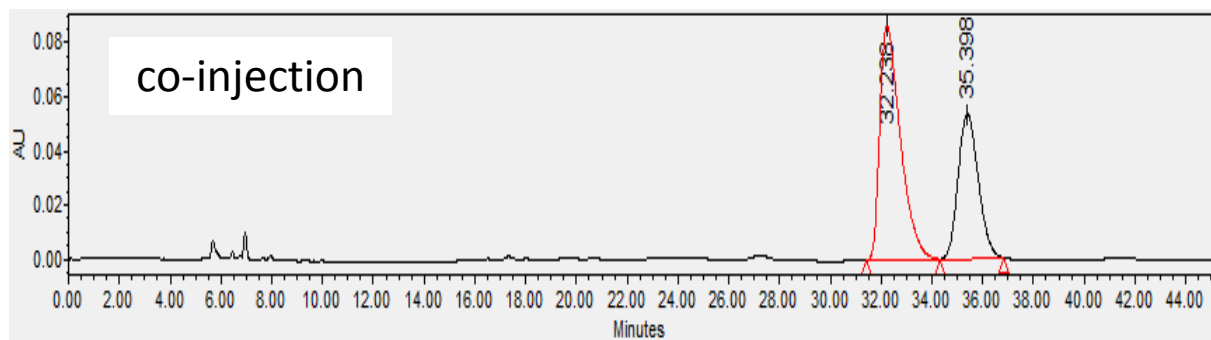

| Retention Time (min) | Purity1 Angle | Purity1 Threshold | PDA/FLR Match1 Spect. Name | PDA/FLR Match1 Angle | PDA/FLR Match1 Threshold | PDA/FLR Match1 Lib. Name | Area (μV*sec) | % Area | Height (μV) |
|----------------------|---------------|-------------------|----------------------------|----------------------|--------------------------|--------------------------|---------------|--------|-------------|
| 27.173               |               |                   |                            |                      |                          |                          | 222107        | 3.28   | 5410        |
| 30.973               |               |                   |                            |                      |                          |                          | 6553544       | 96.72  | 131099      |

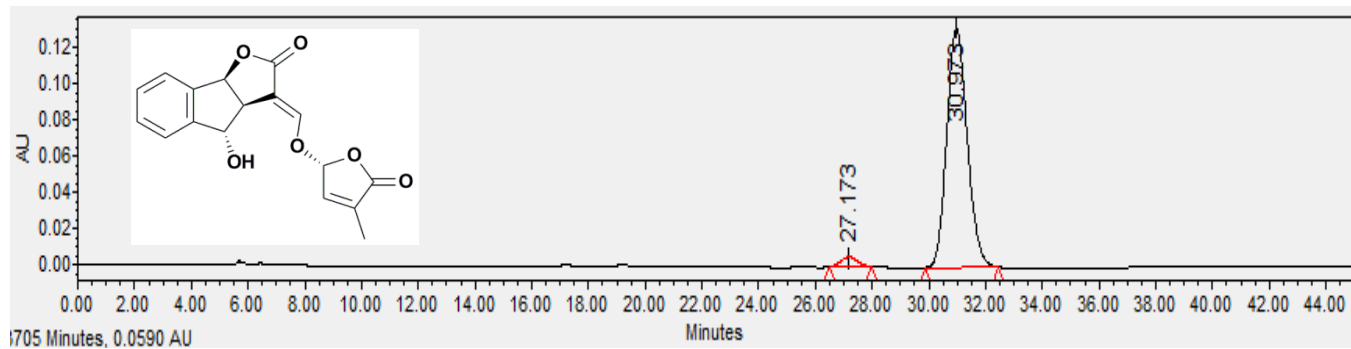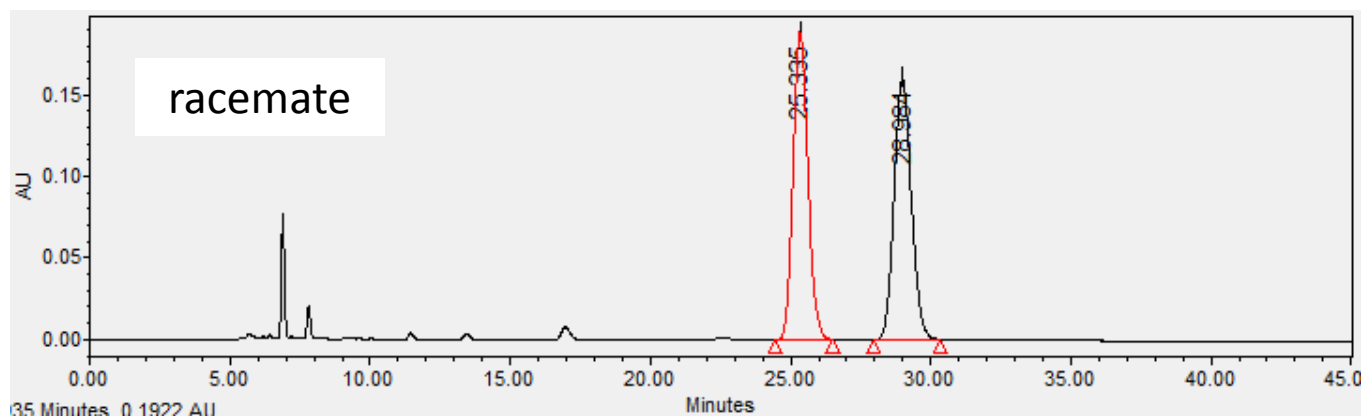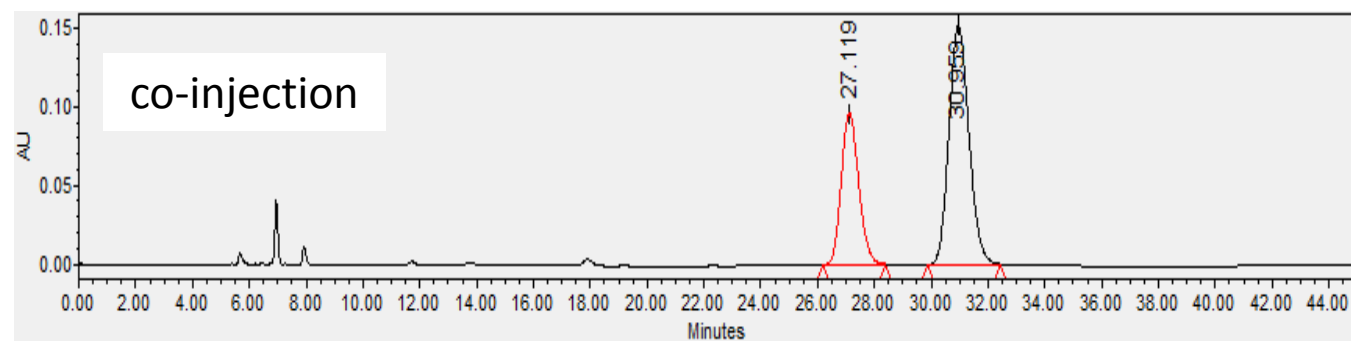

| Retention Time (min) | Purity1 Angle | Purity1 Threshold | PDA/FLR Match1 Spect. Name | PDA/FLR Match1 Angle | PDA/FLR Match1 Threshold | PDA/FLR Match1 Lib. Name | Area (μV*sec) | % Area | Height (μV) |
|----------------------|---------------|-------------------|----------------------------|----------------------|--------------------------|--------------------------|---------------|--------|-------------|
| 25.203               |               |                   |                            |                      |                          |                          | 9509975       | 96.82  | 260833      |
| 28.853               |               |                   |                            |                      |                          |                          | 312739        | 3.18   | 8056        |
|                      |               |                   |                            |                      |                          |                          |               |        |             |

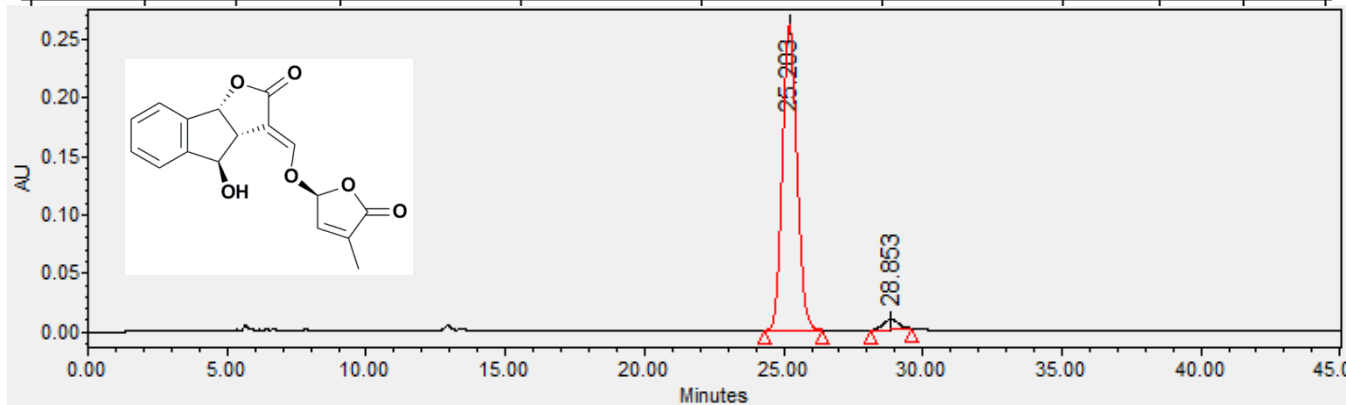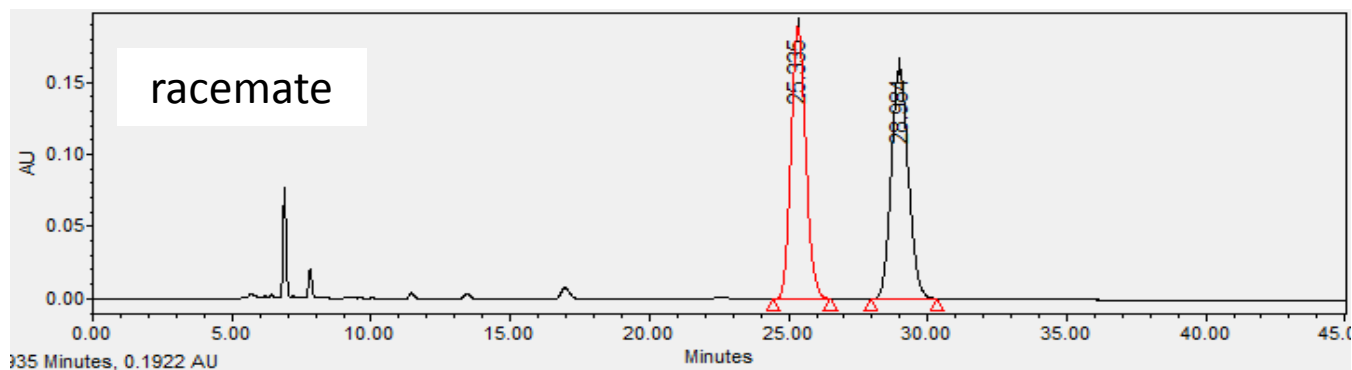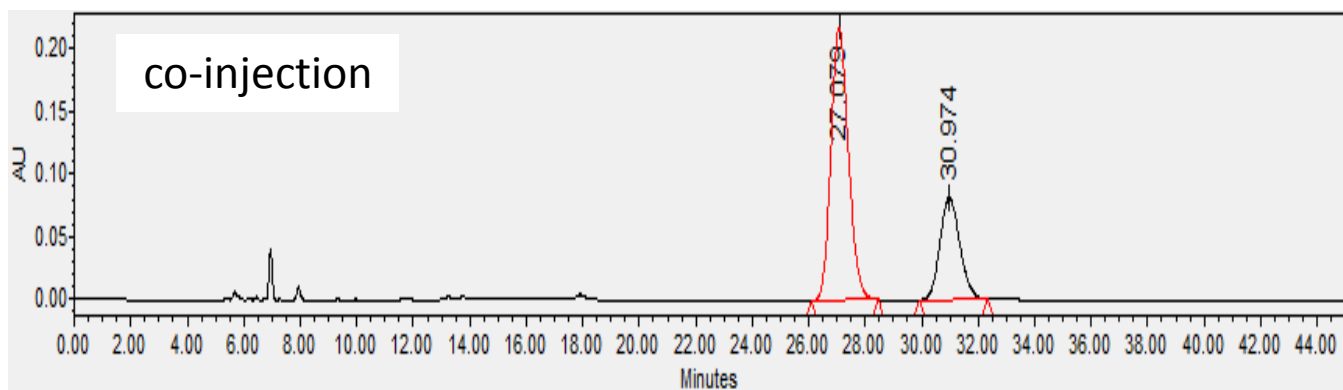

| Retention Time (min) | Purity1 Angle | Purity1 Threshold | PDA/FLR Match1 Spect. Name | PDA/FLR Match1 Angle | PDA/FLR Match1 Threshold | PDA/FLR Match1 Lib. Name | Area (μV*sec) | % Area | Height (μV) |
|----------------------|---------------|-------------------|----------------------------|----------------------|--------------------------|--------------------------|---------------|--------|-------------|
| 32.858               |               |                   |                            |                      |                          |                          | 198789        | 3.20   | 3785        |
| 35.346               |               |                   |                            |                      |                          |                          | 6014805       | 96.80  | 108667      |
|                      |               |                   |                            |                      |                          |                          |               |        |             |

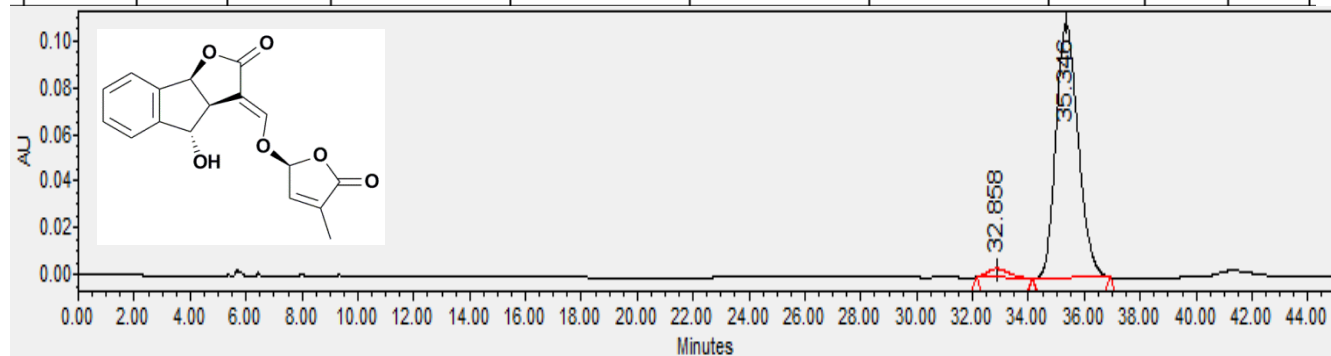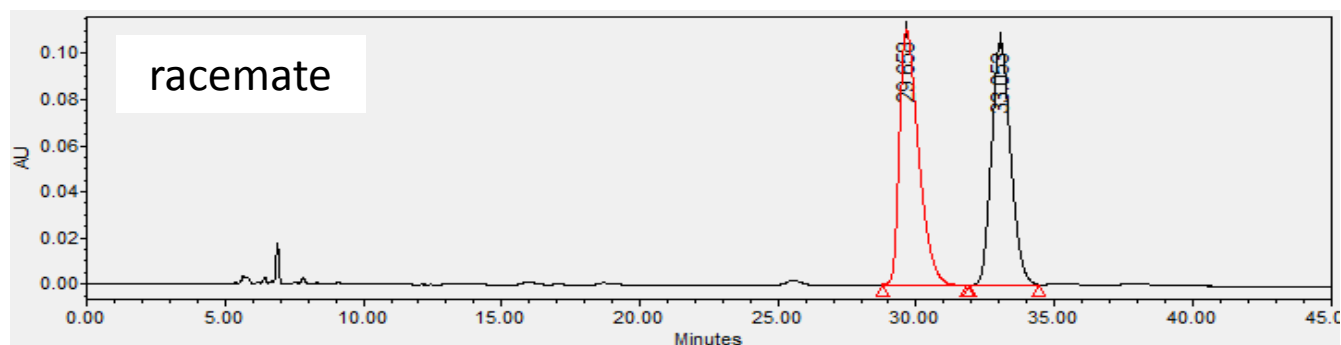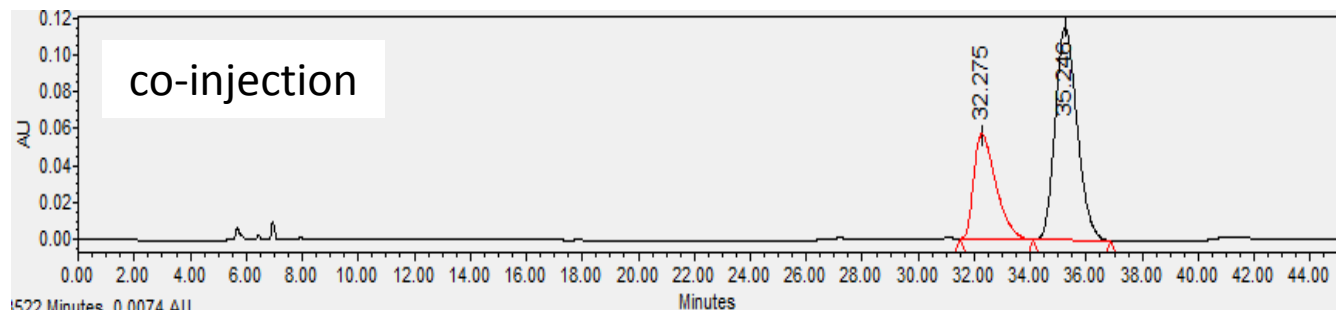

## Racemisation studies

In order to ascertain the most appropriate conditions for maximizing both yield and level of enantioselectivity for the Noyori asymmetric kinetic resolution of alcohol ( $\pm$ )-**6**, the reaction time was varied and the *e.e.* of the corresponding *anti*-alcohol (–)-**8** was assessed by enantioselective HPLC.

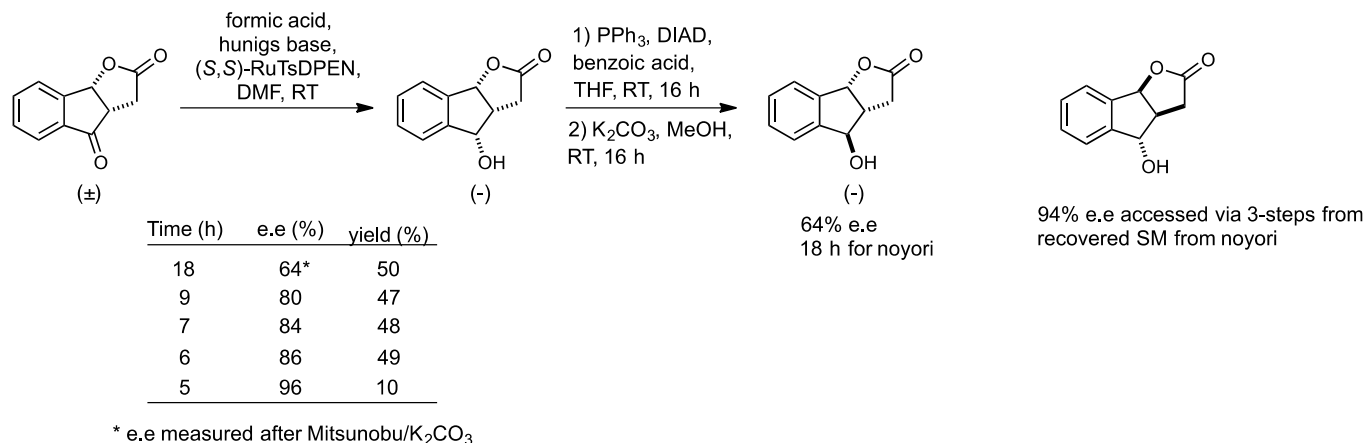

In order to ascertain whether the solvent or the catalyst were responsible for the observed racemization, the Noyori asymmetric kinetic resolution of alcohol ( $\pm$ )-**6** was carried out under phase transfer conditions that enable the catalyst to migrate into the organic phase. This suggests that the catalyst (or a decomposition product thereof) is responsible for the epimerisation.

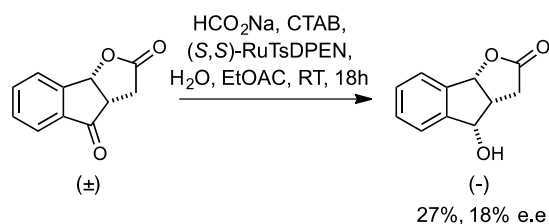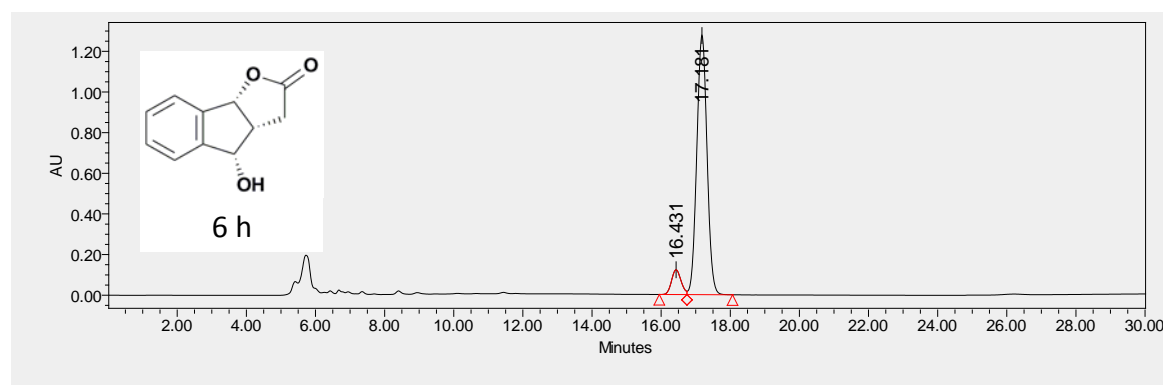

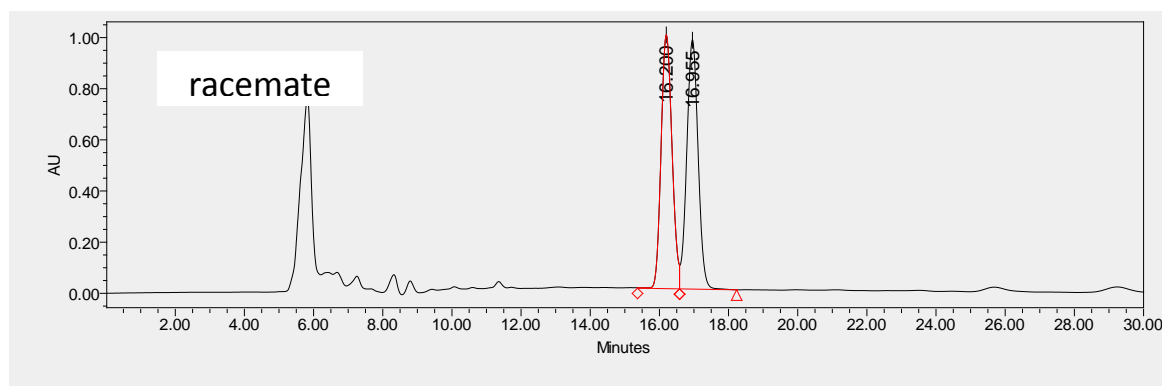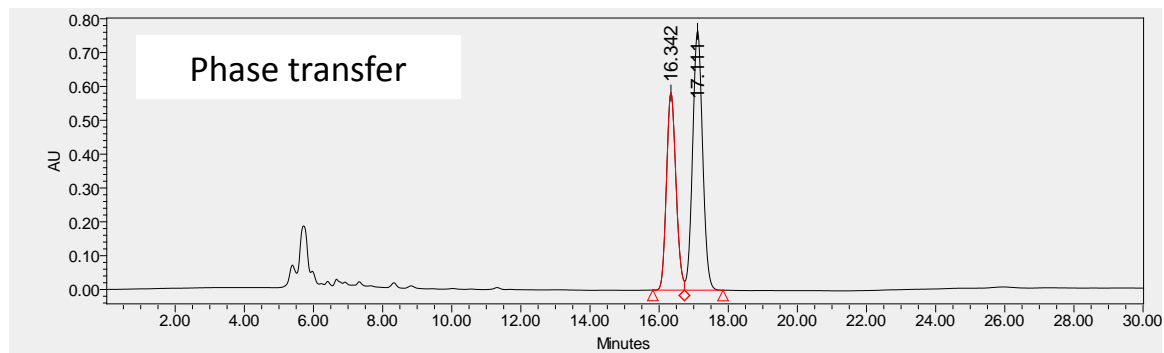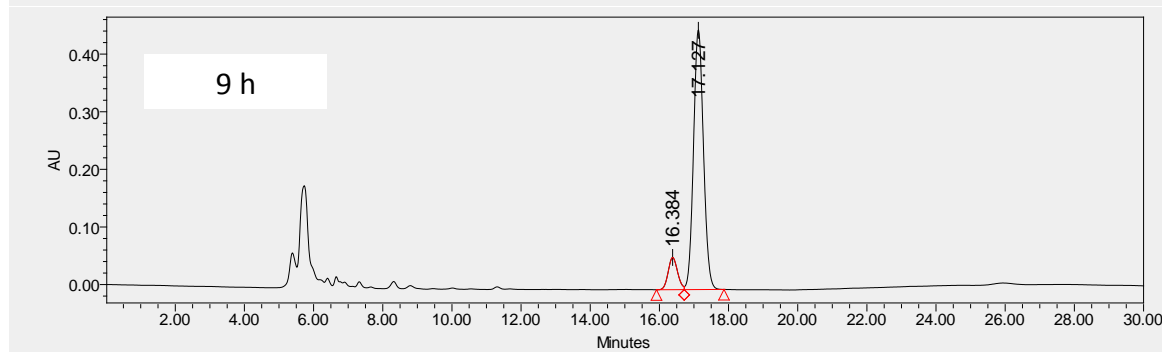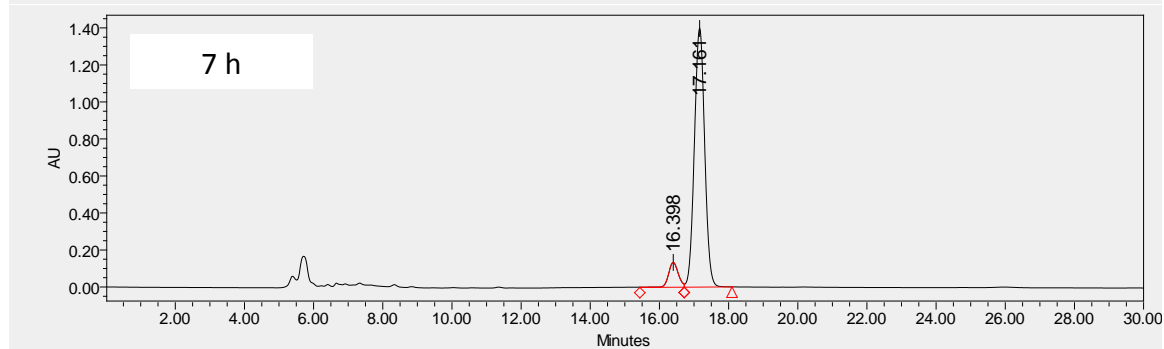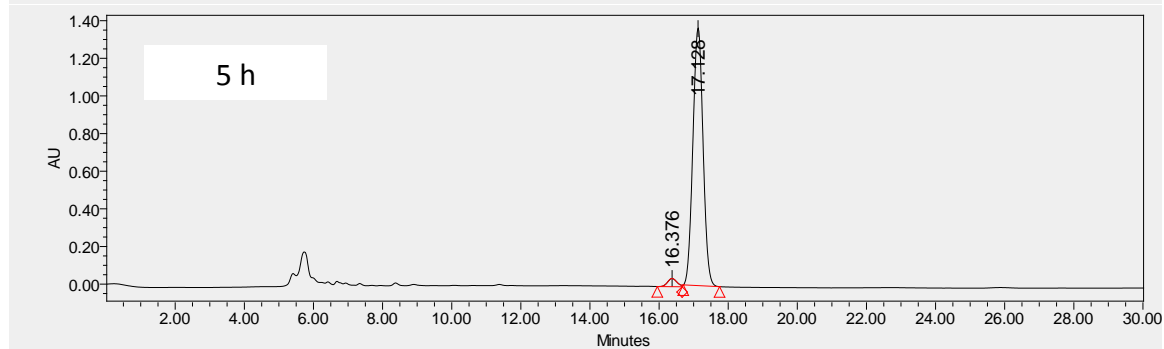

## CD spectra

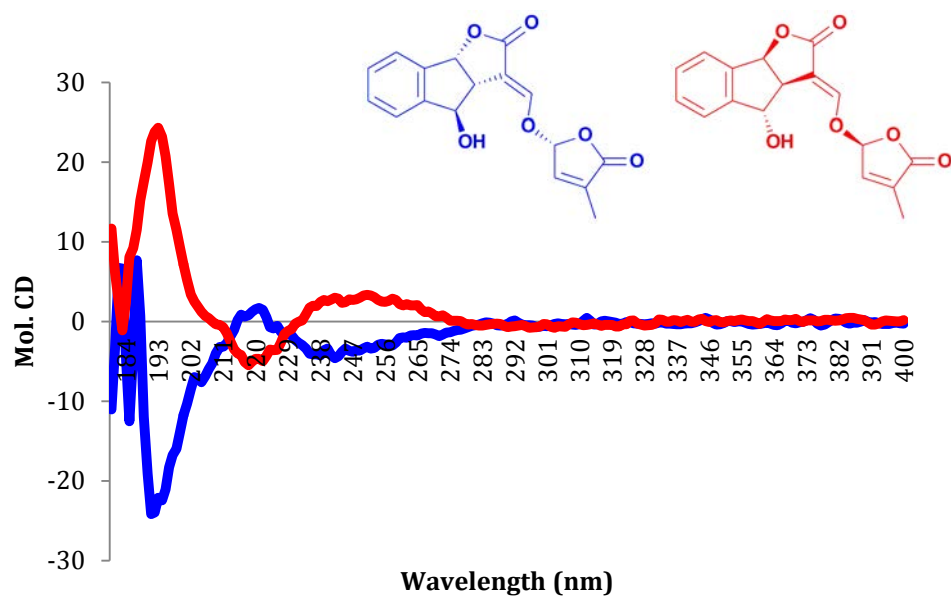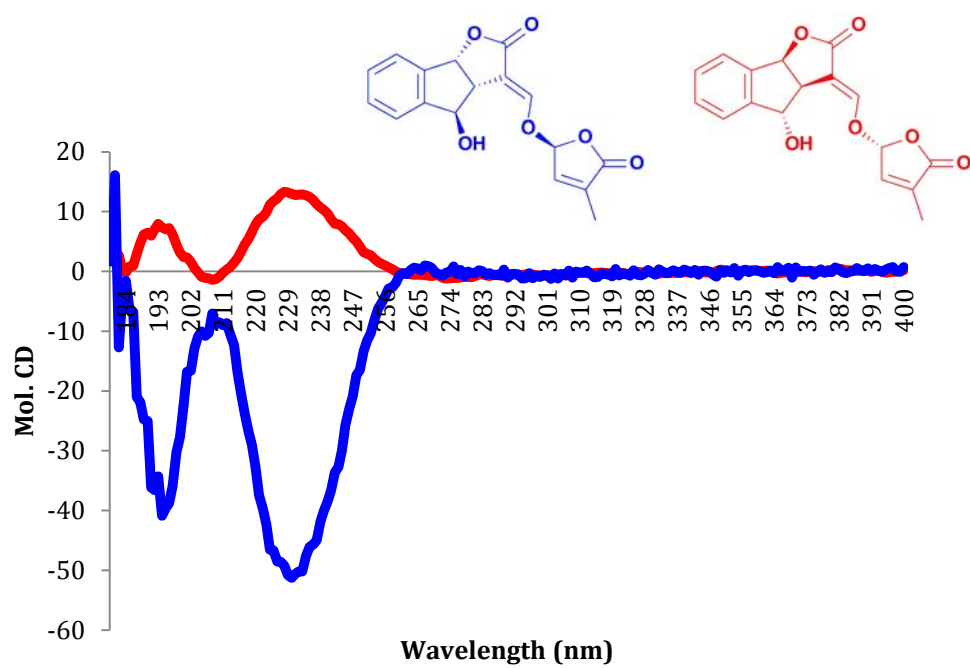



## References

- [1] L. J. Bromhead, J. Visser, C. S. P. McErlean, *J. Org. Chem.* **2014**, 79, 1516-1520.
- [2] G. K. Cooper, L. J. Dolby, *J. Org. Chem.* **1979**, 44, 3414-3416.
- [3] H. Malik, W. Kohlen, M. Jamil, F. P. J. T. Rutjes, B. Zwanenburg, *Org. Biomol. Chem.* **2011**, 9, 2286-2293.

6.717  
6.696  
6.683  
6.662  
6.488  
6.485  
6.454  
6.451  
5.958  
5.955  
5.937  
5.935  
5.849

$J_{M3-117.1}$   
 $^1H$  NMR (500 MHz,  $CDCl_3$ )

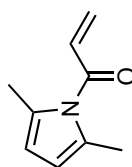

2.346

6.92

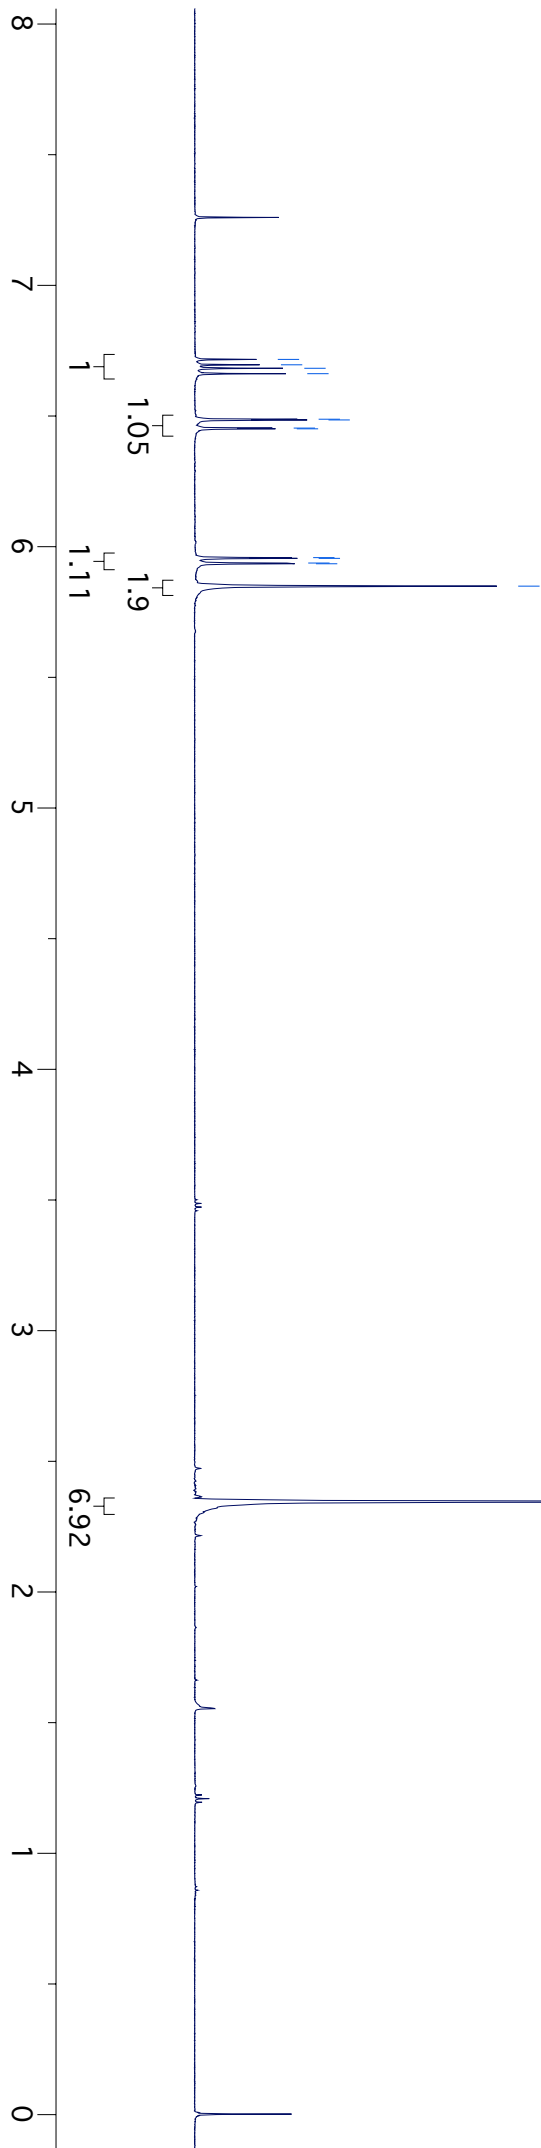

N-acetylpyrrole  
<sup>13</sup>C NMR (75 MHz, CDCl<sub>3</sub>)

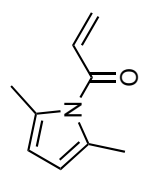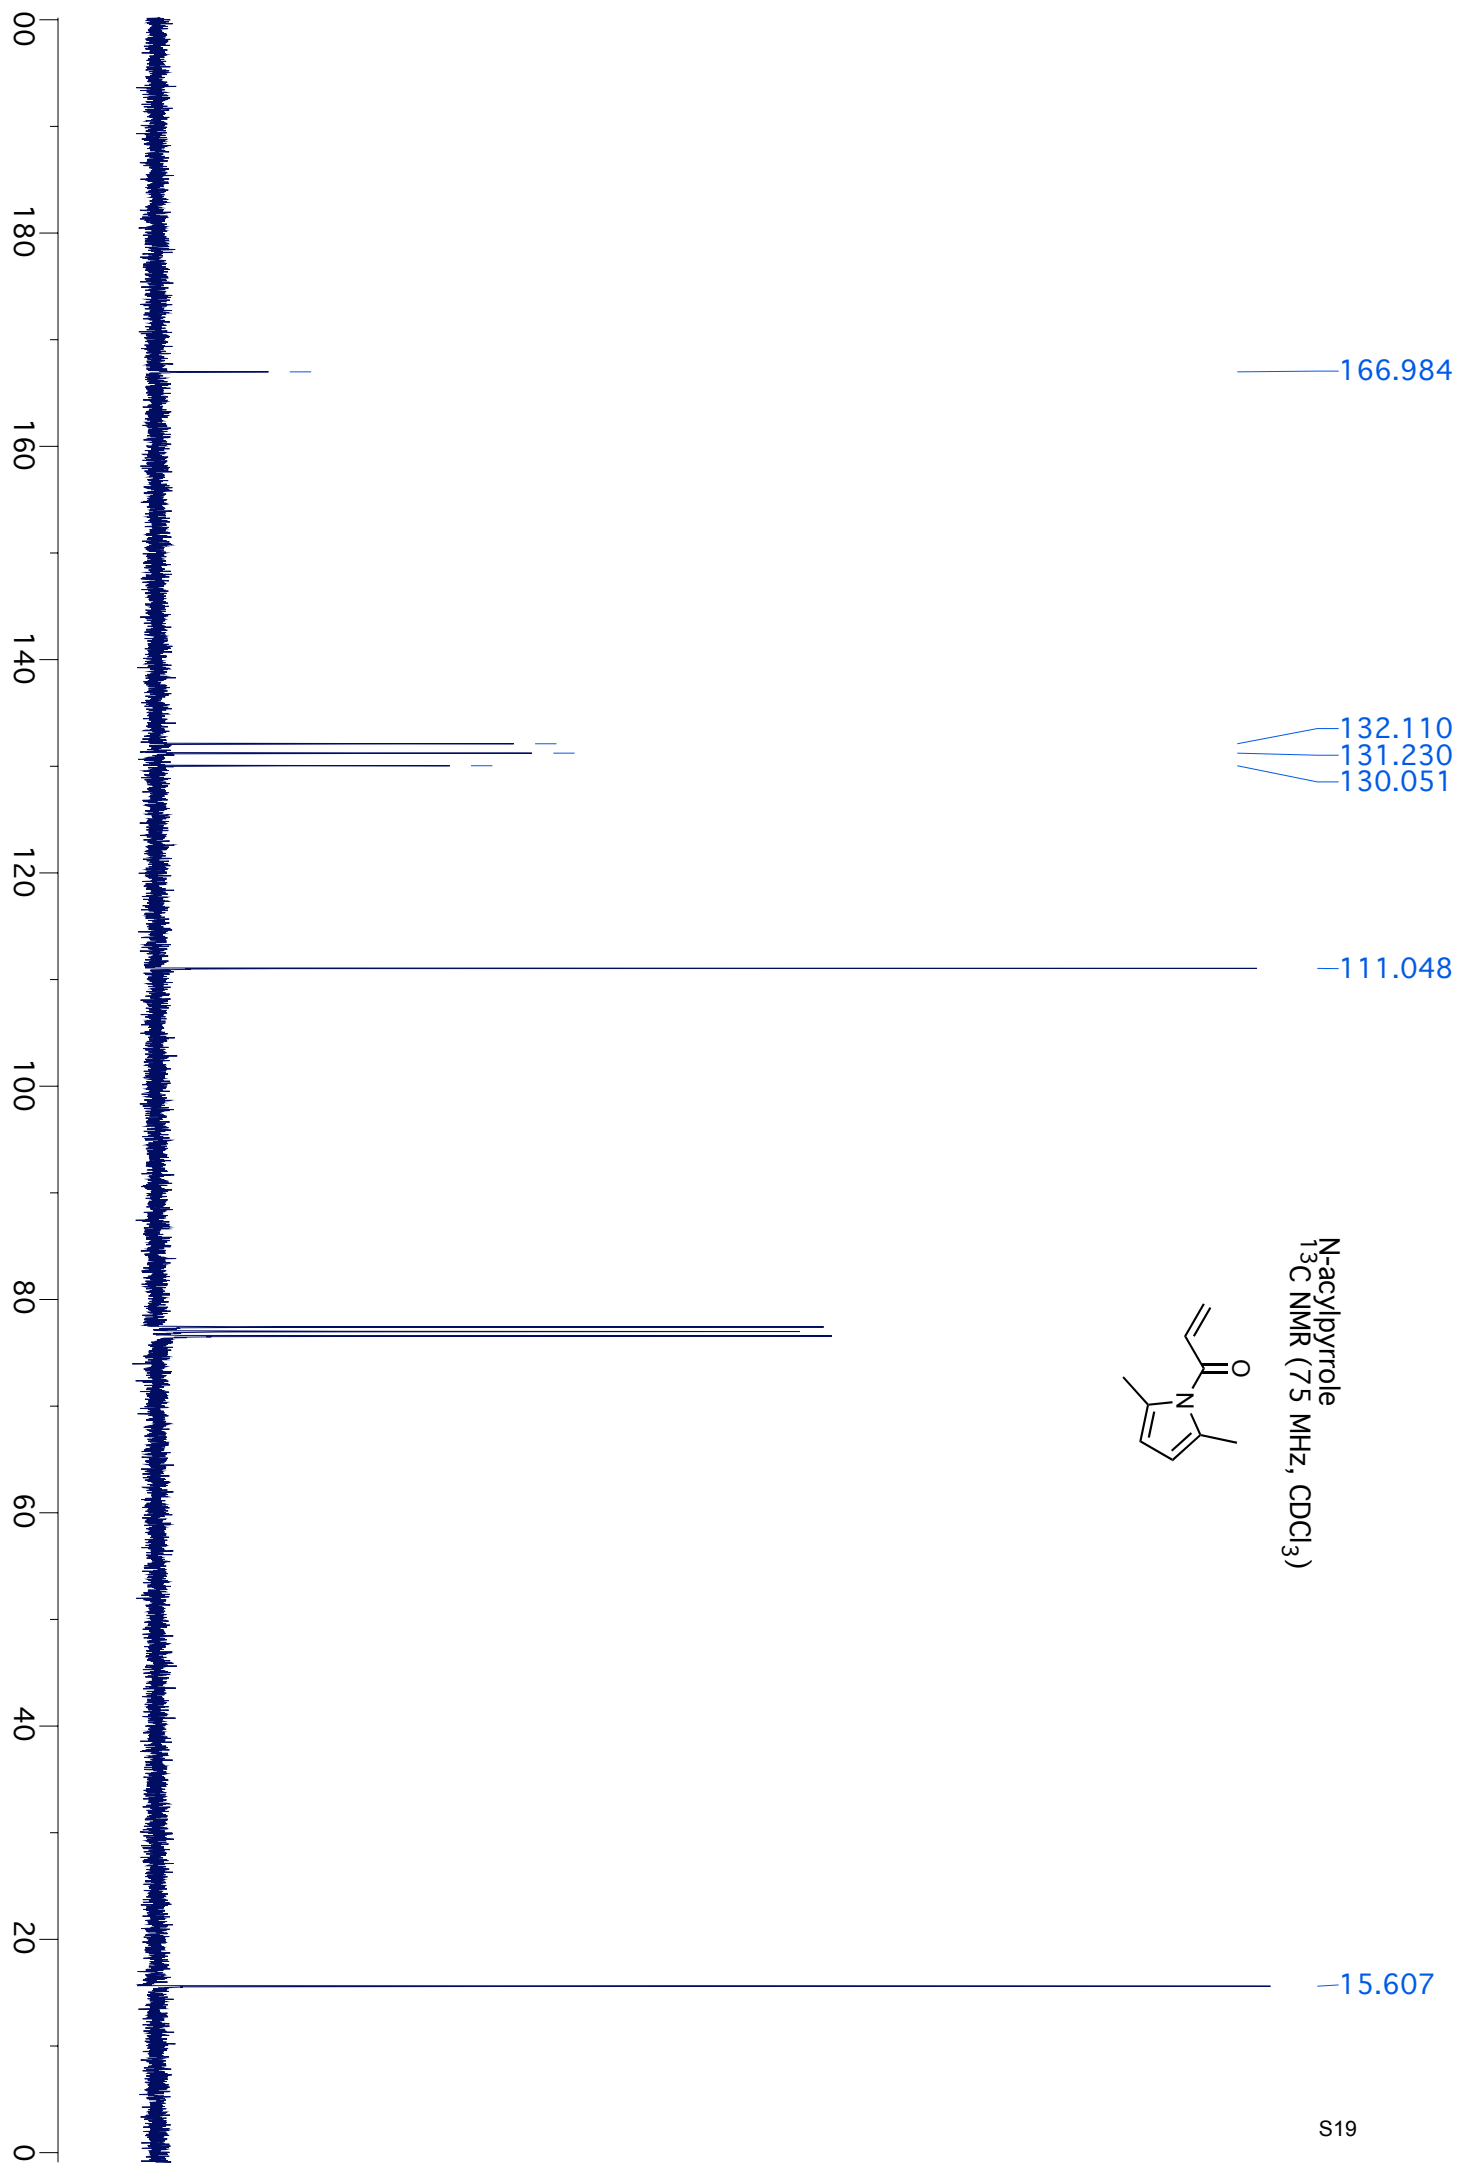

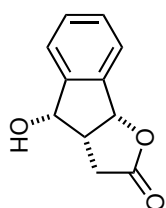

$J_{M_2-87.1}$   
 $^1\text{H NMR}$  (400 MHz,  $\text{CDCl}_3$ )

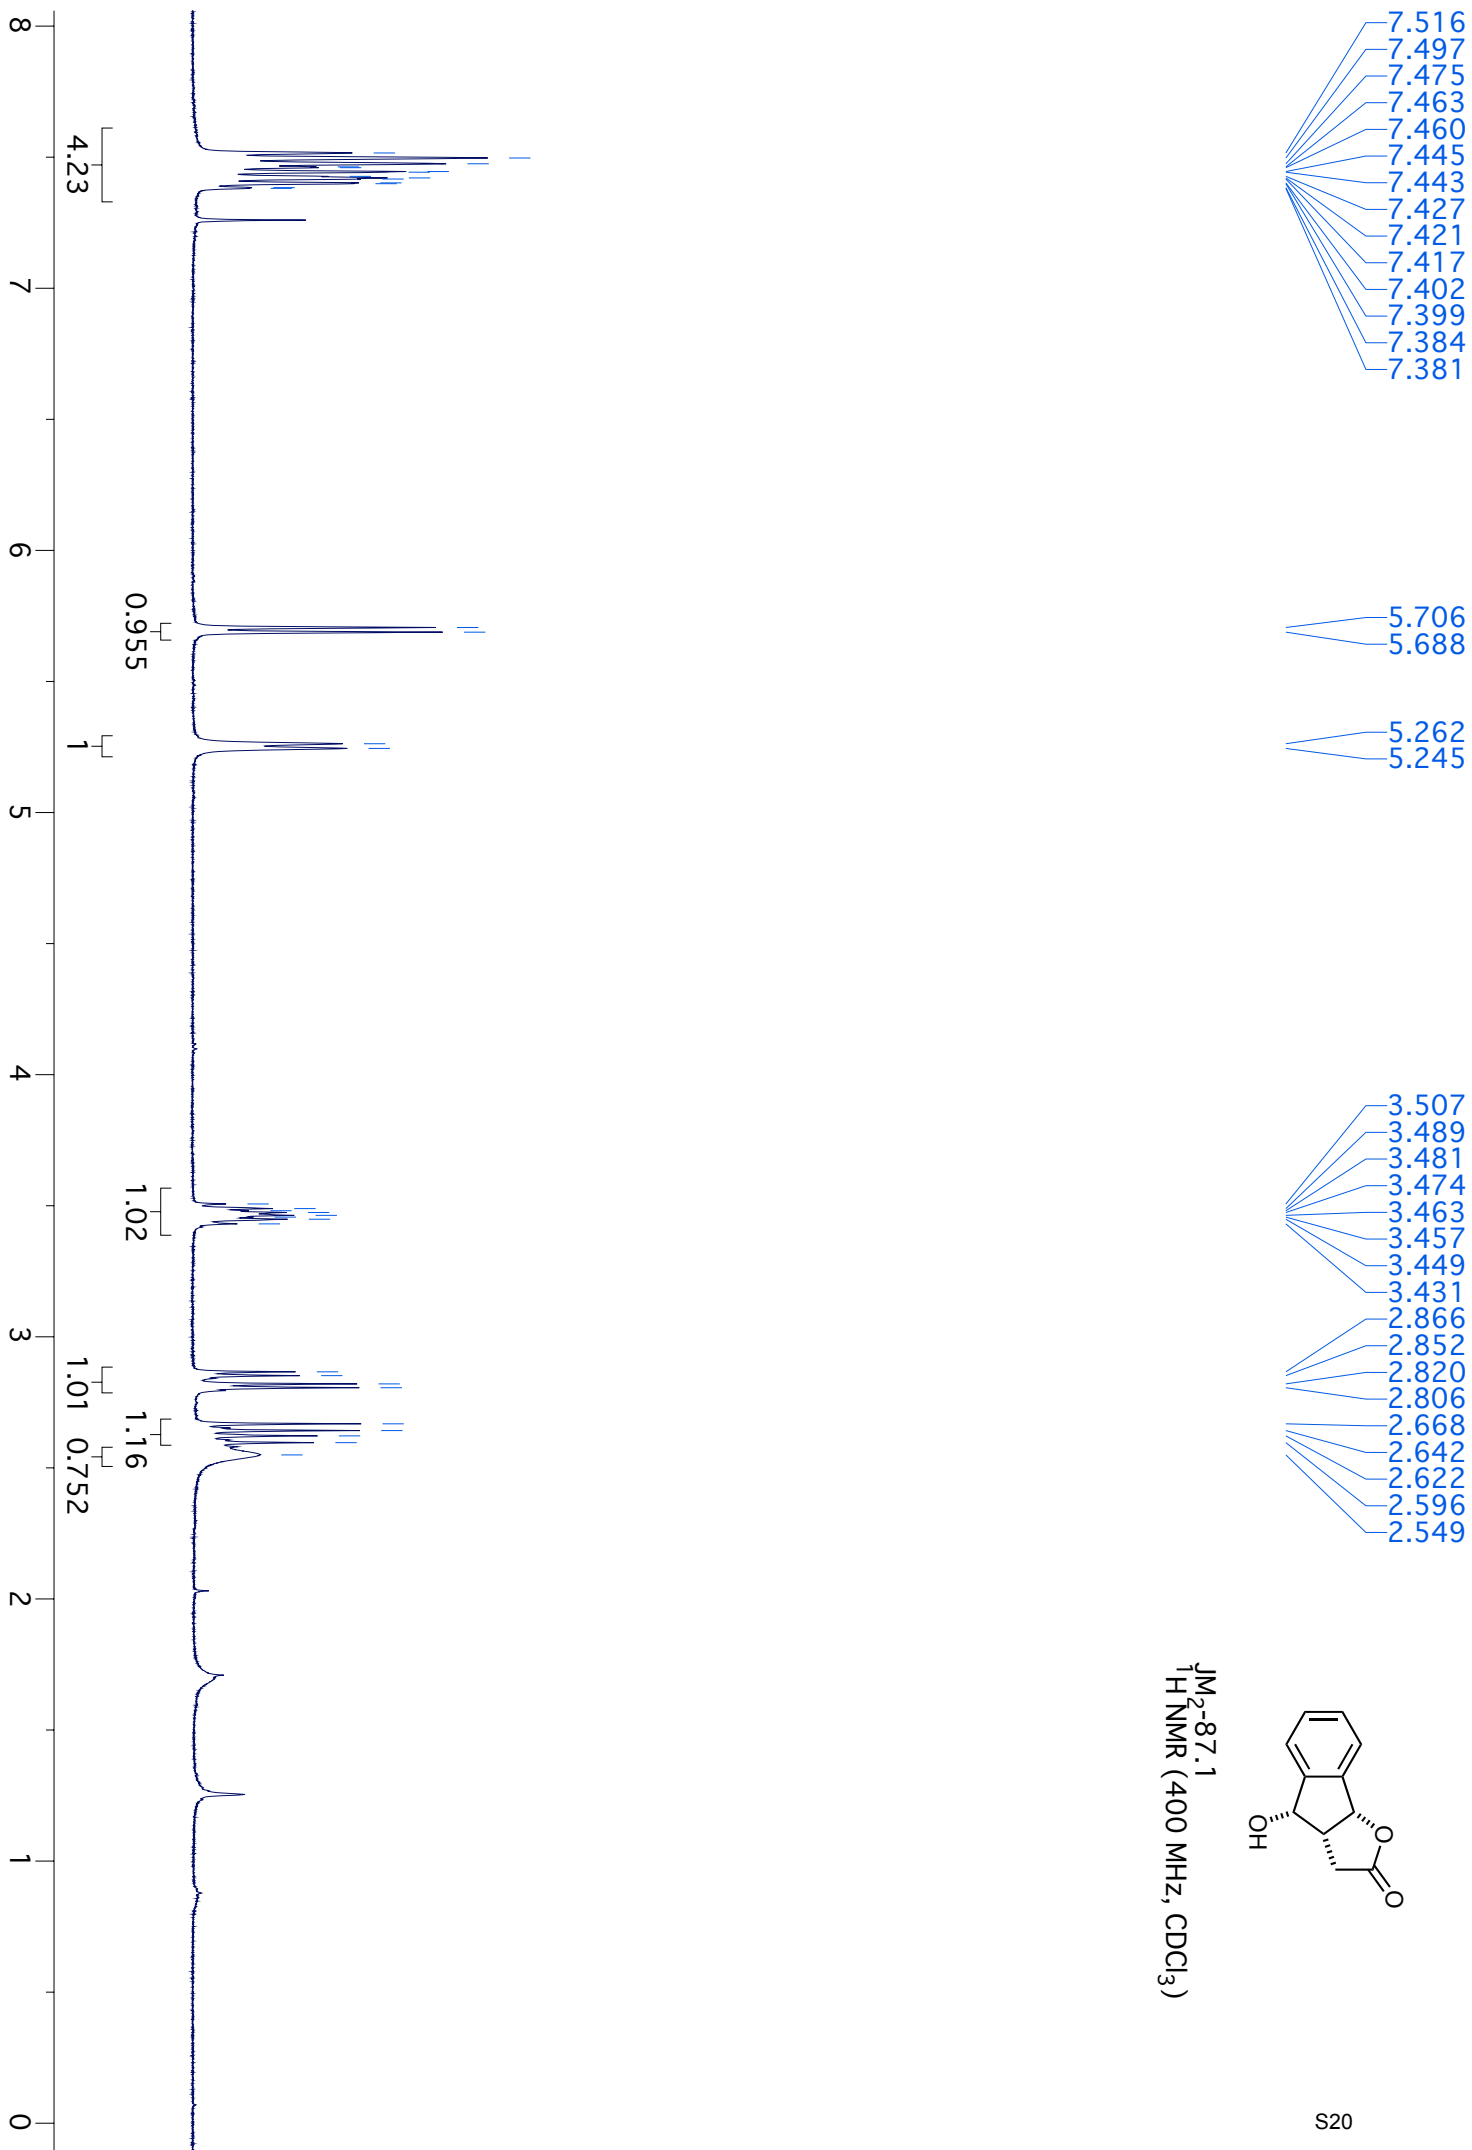

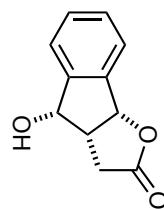

$M_r = 87.1$   
 $^{13}\text{C}$  NMR (100 MHz,  $\text{CDCl}_3$ )

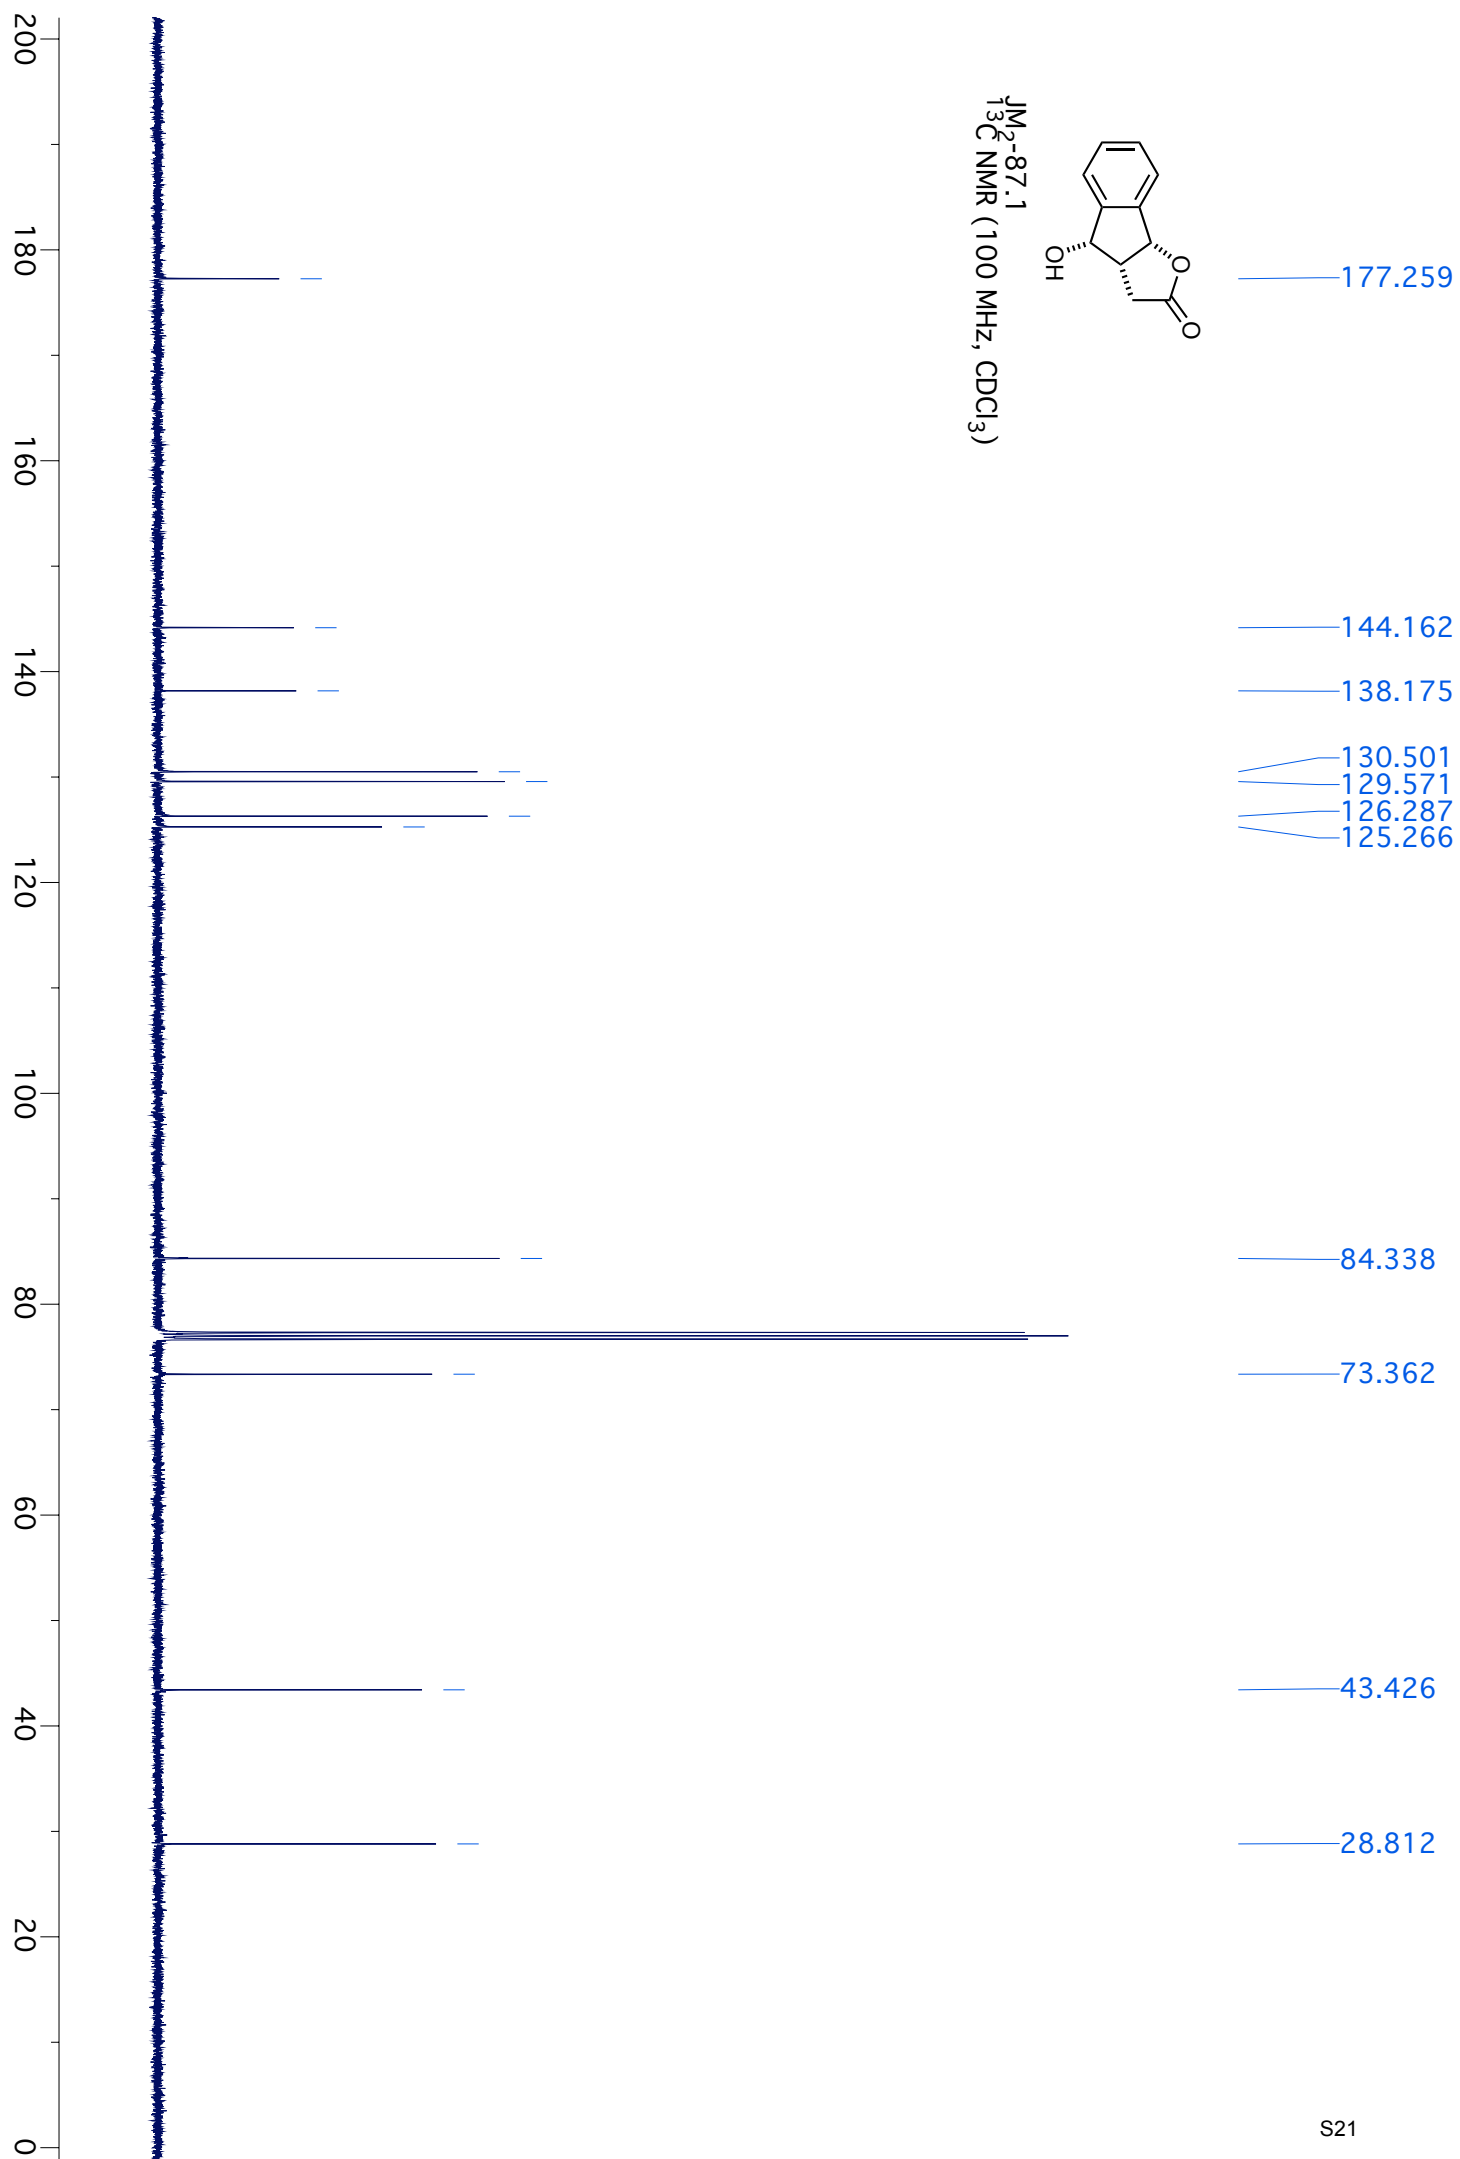

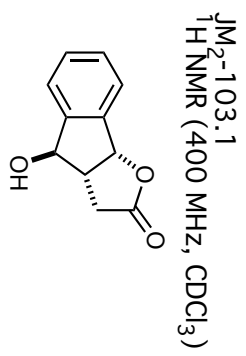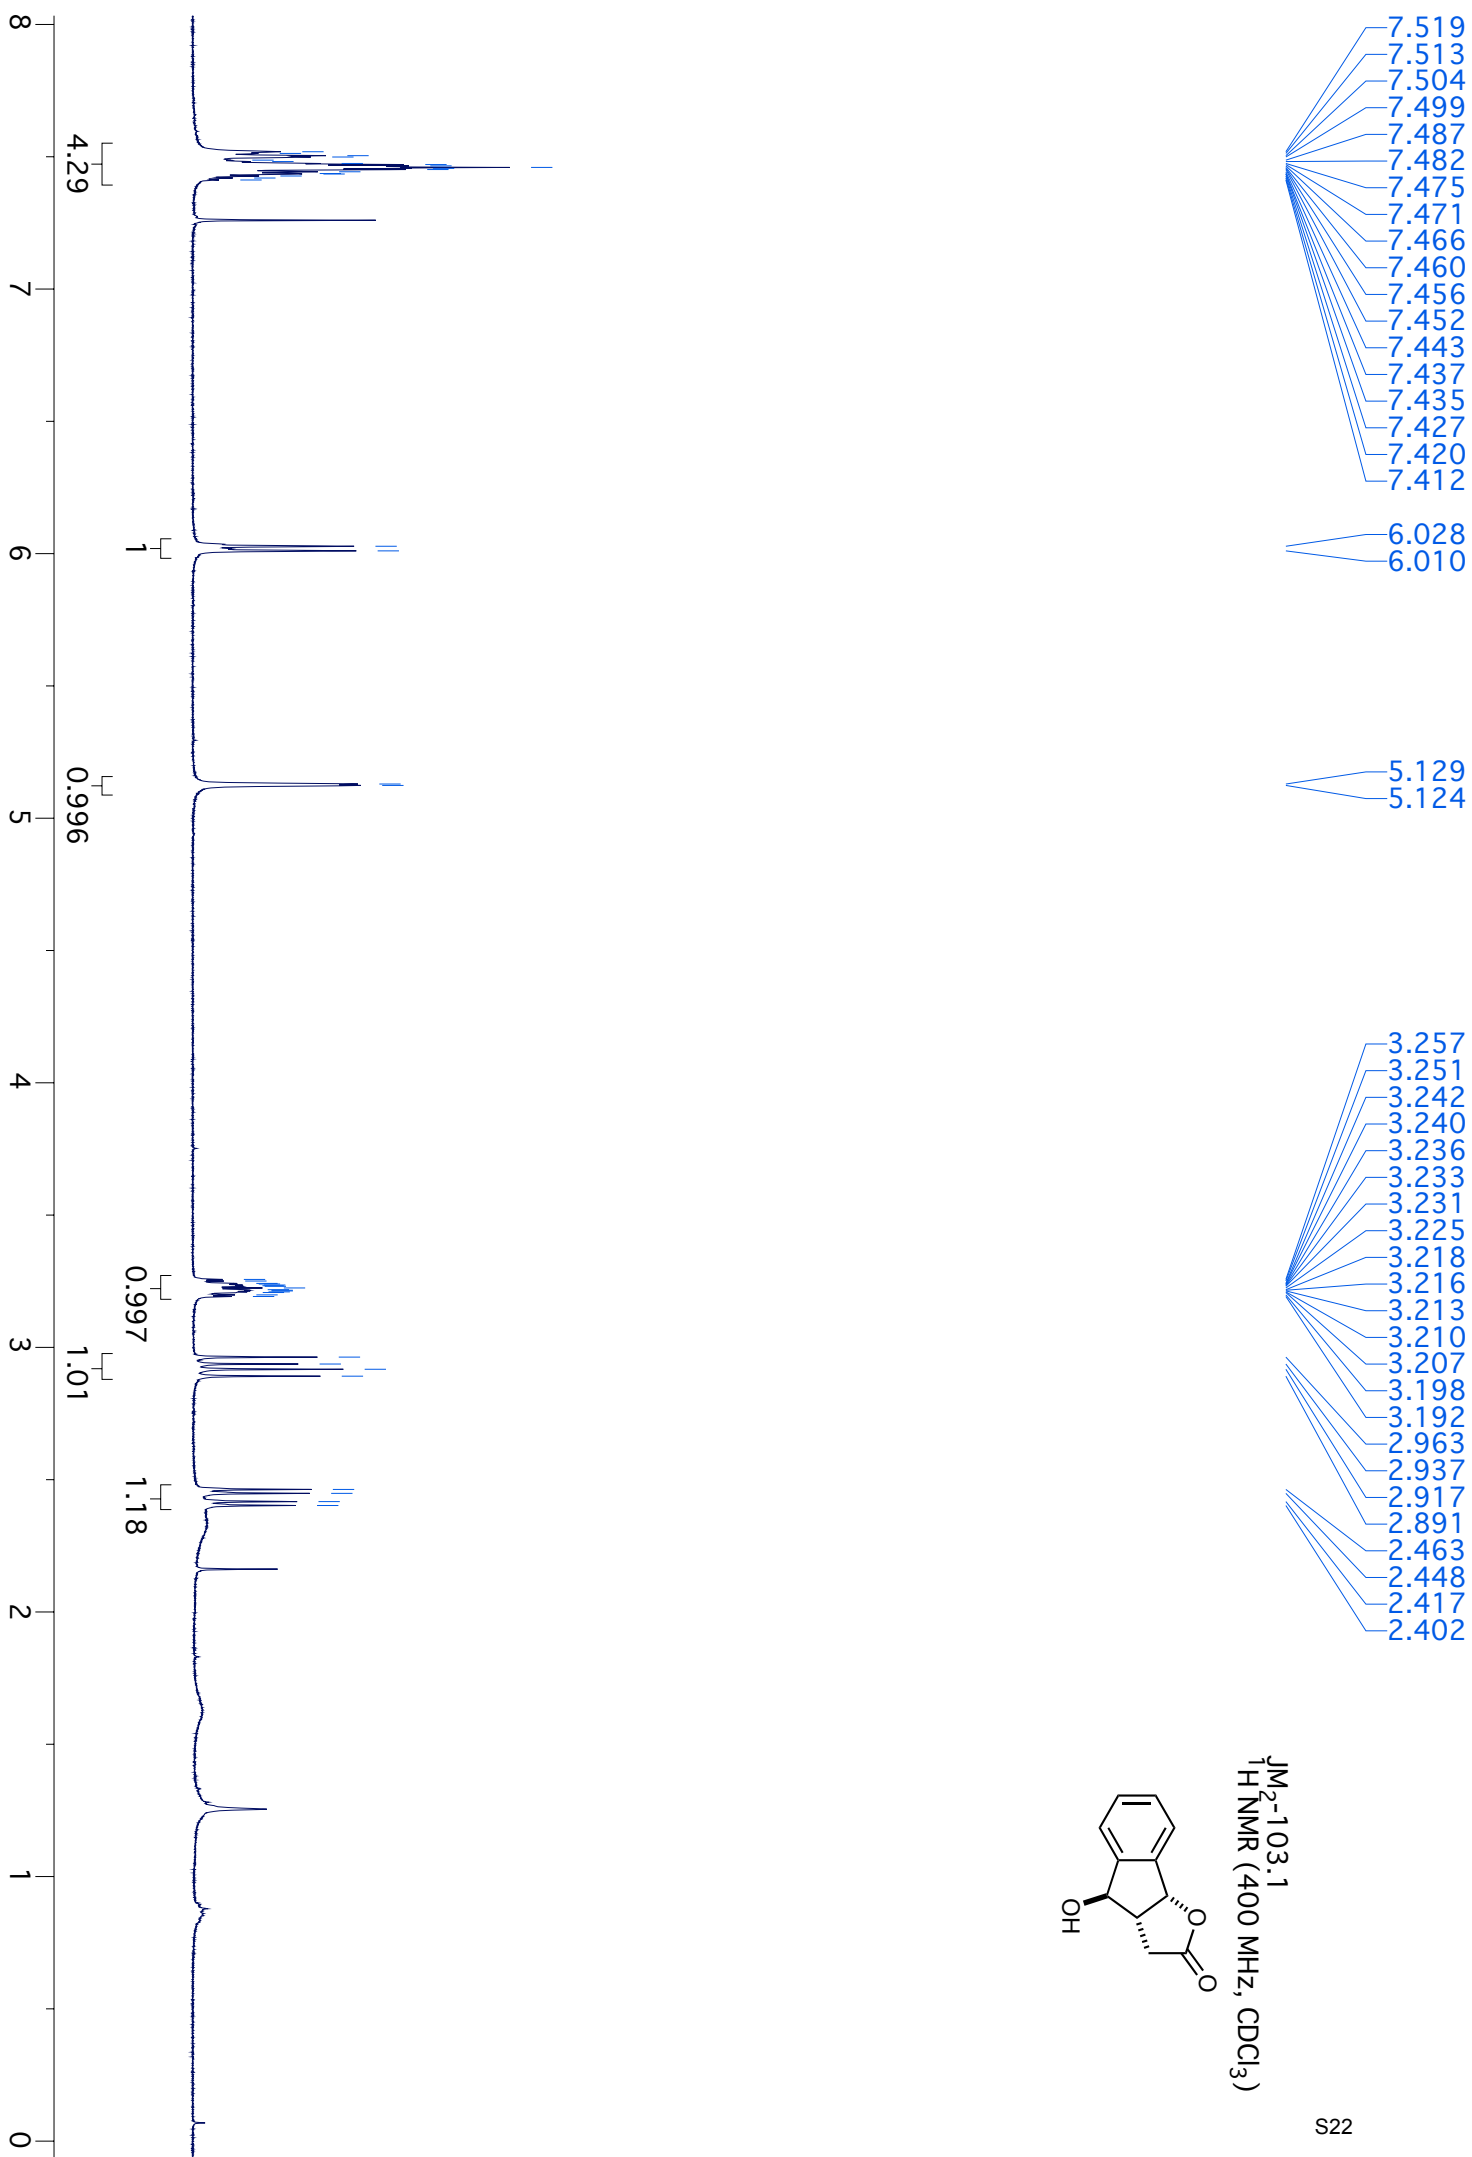

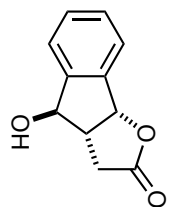

$^1\text{H}$ -103.1  
 $^{13}\text{C}$  NMR (100 MHz,  $\text{CDCl}_3$ )

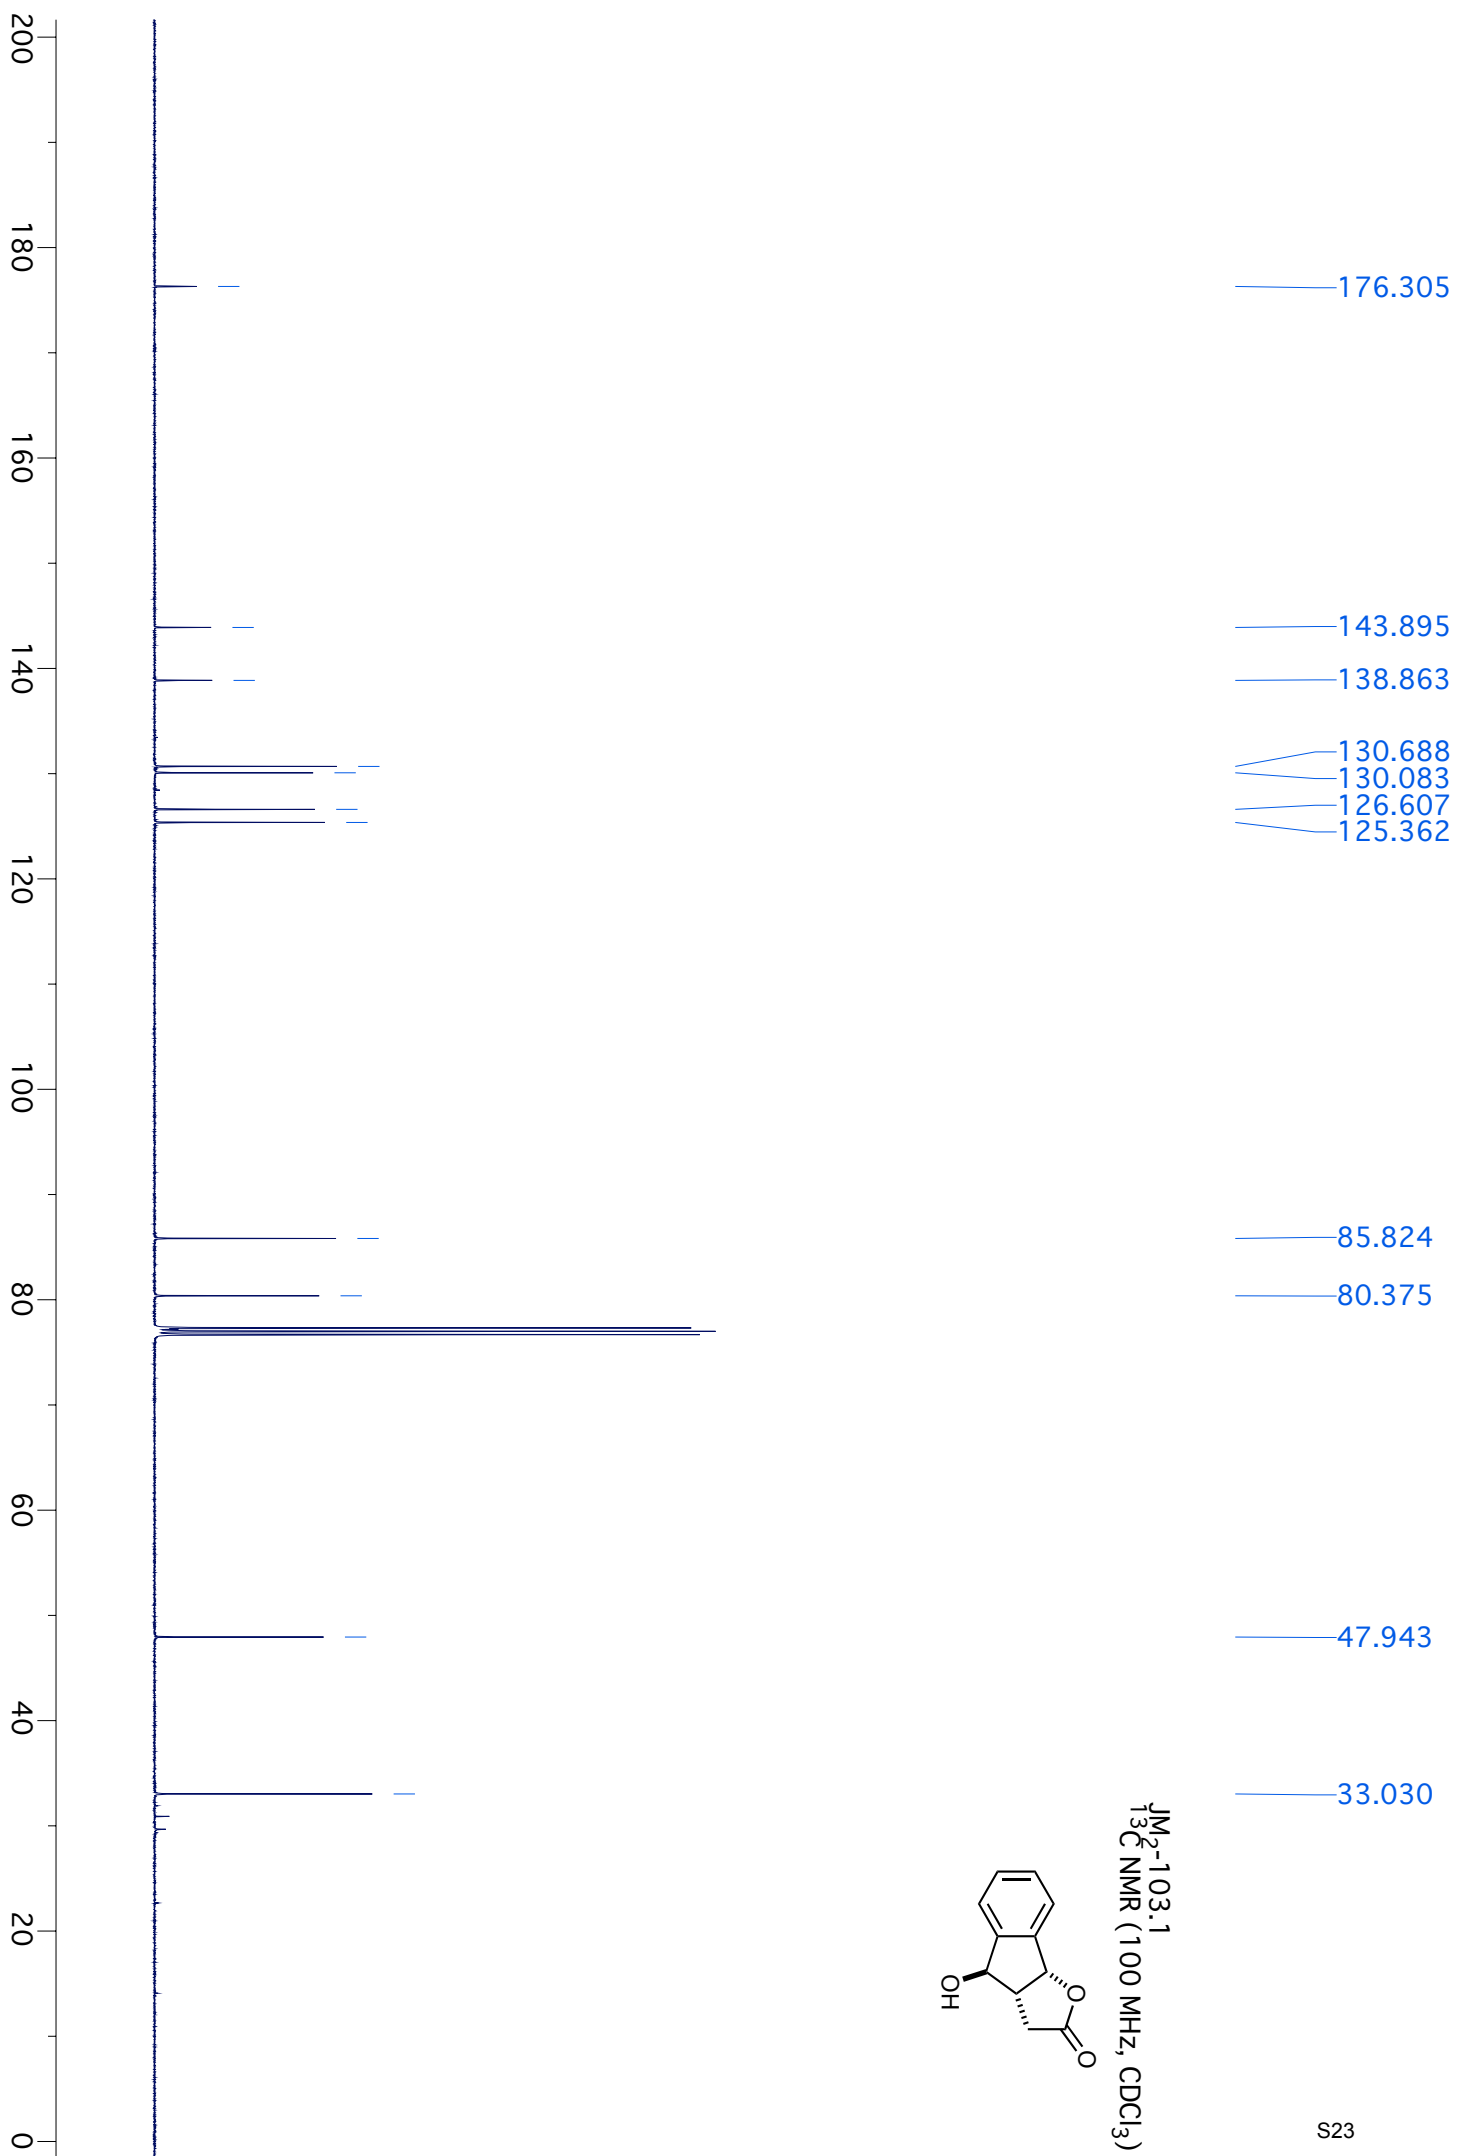

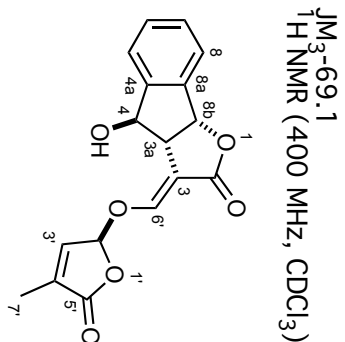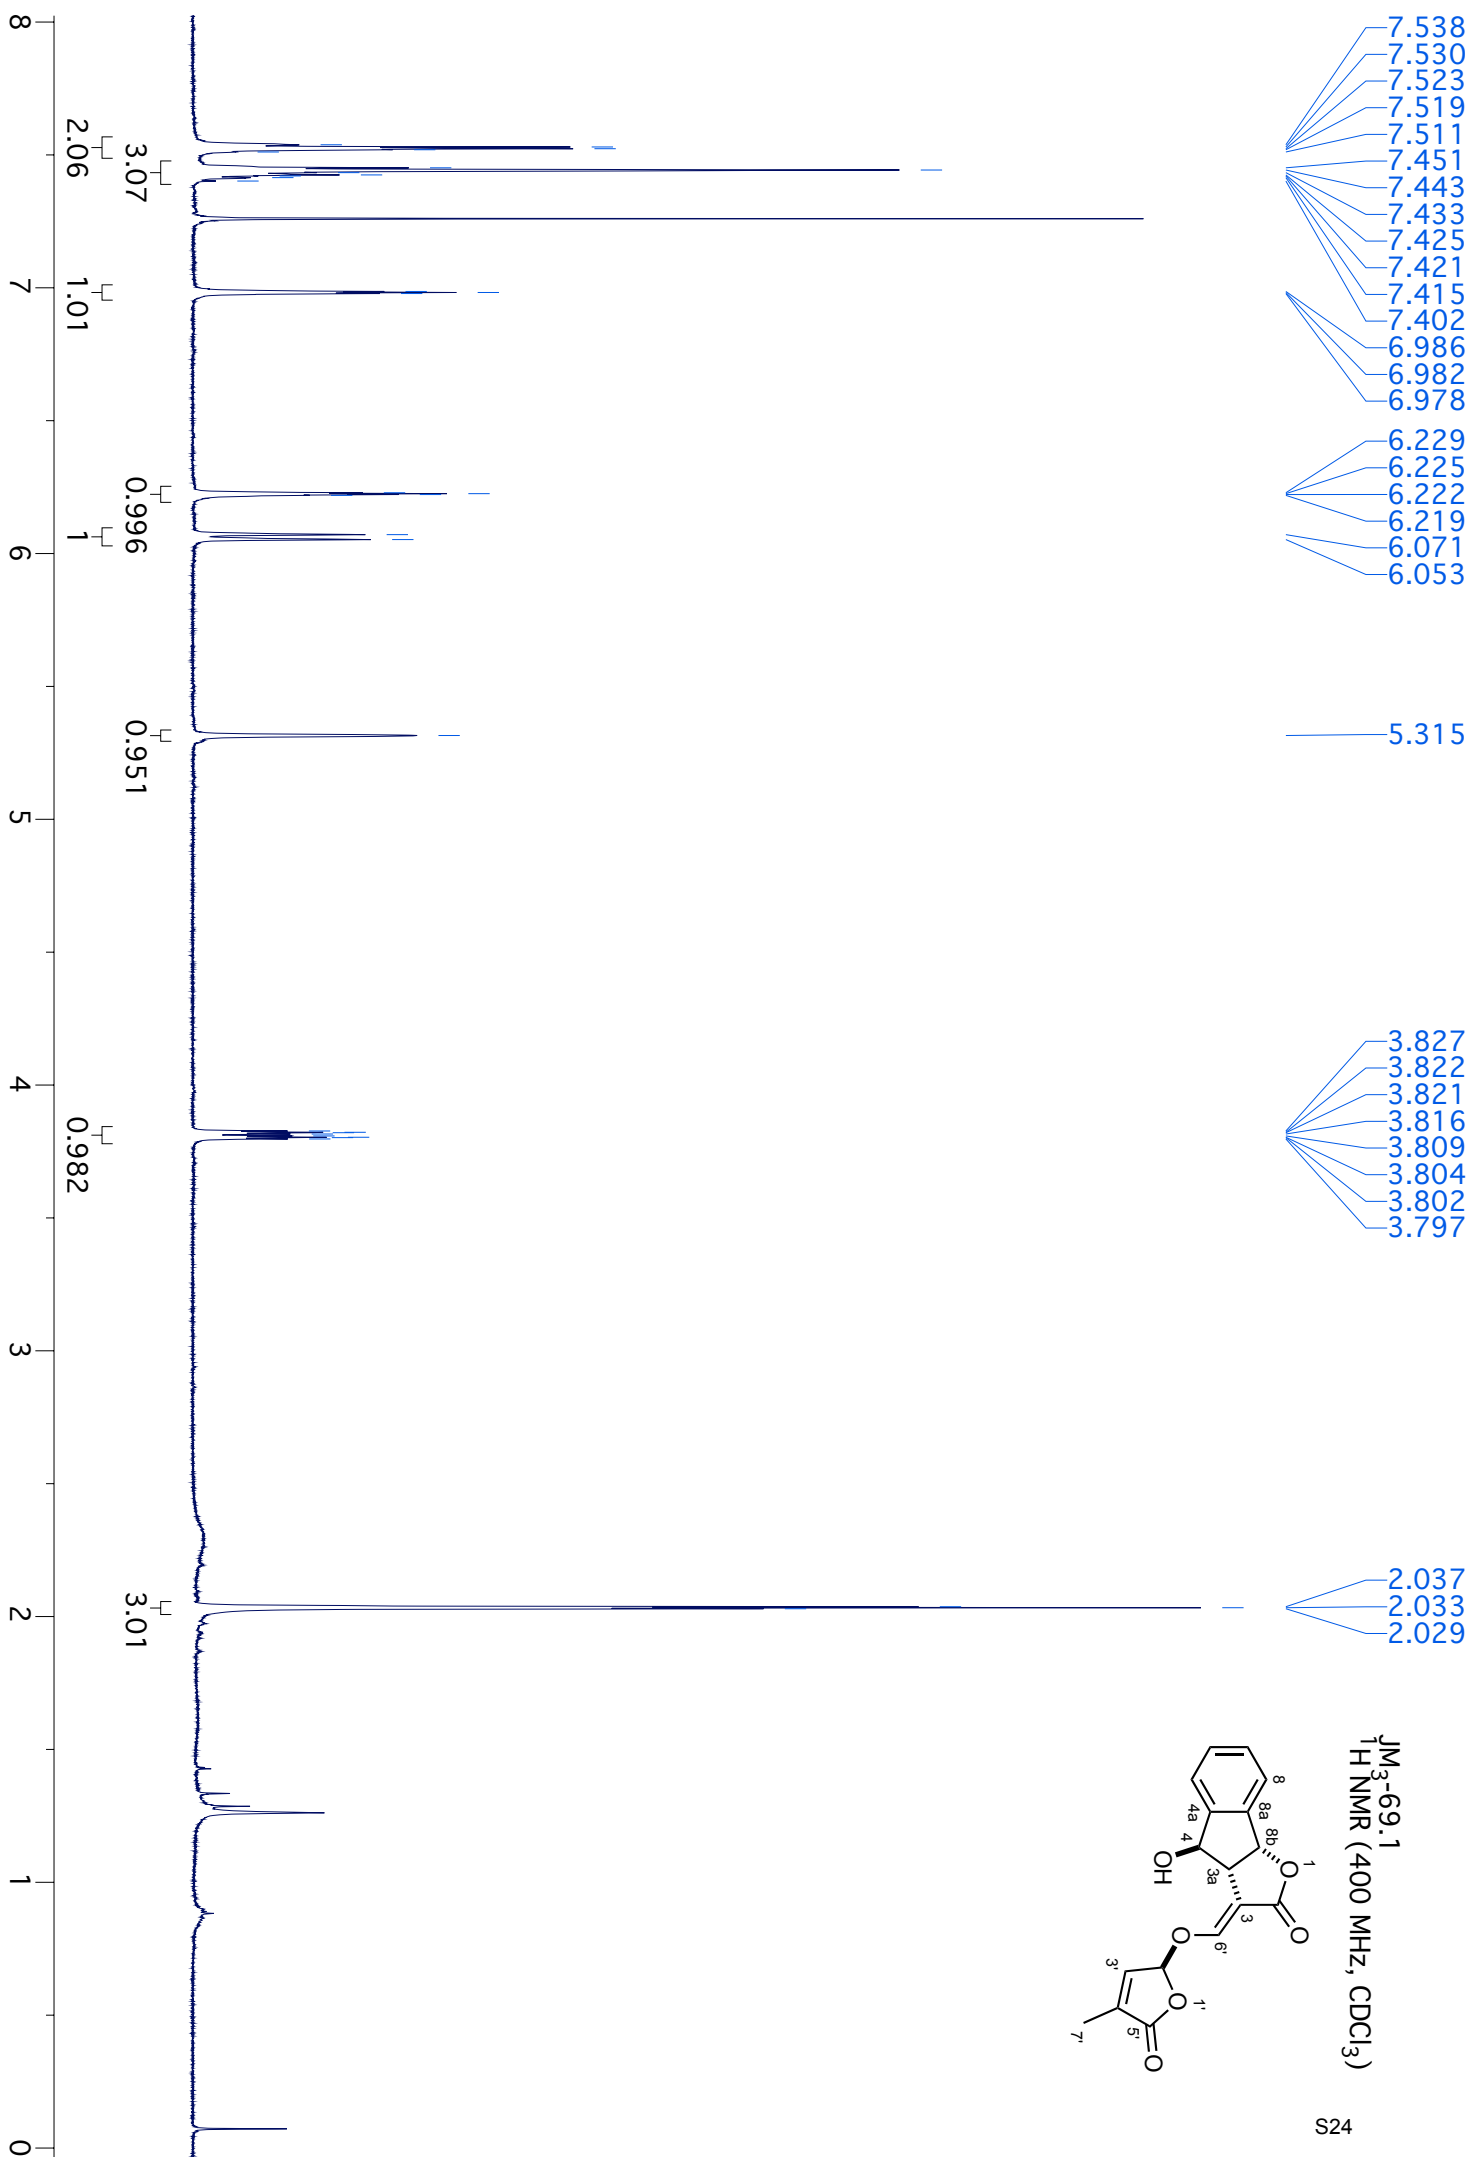



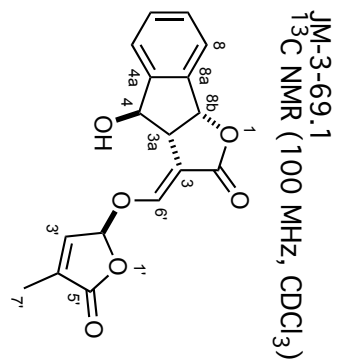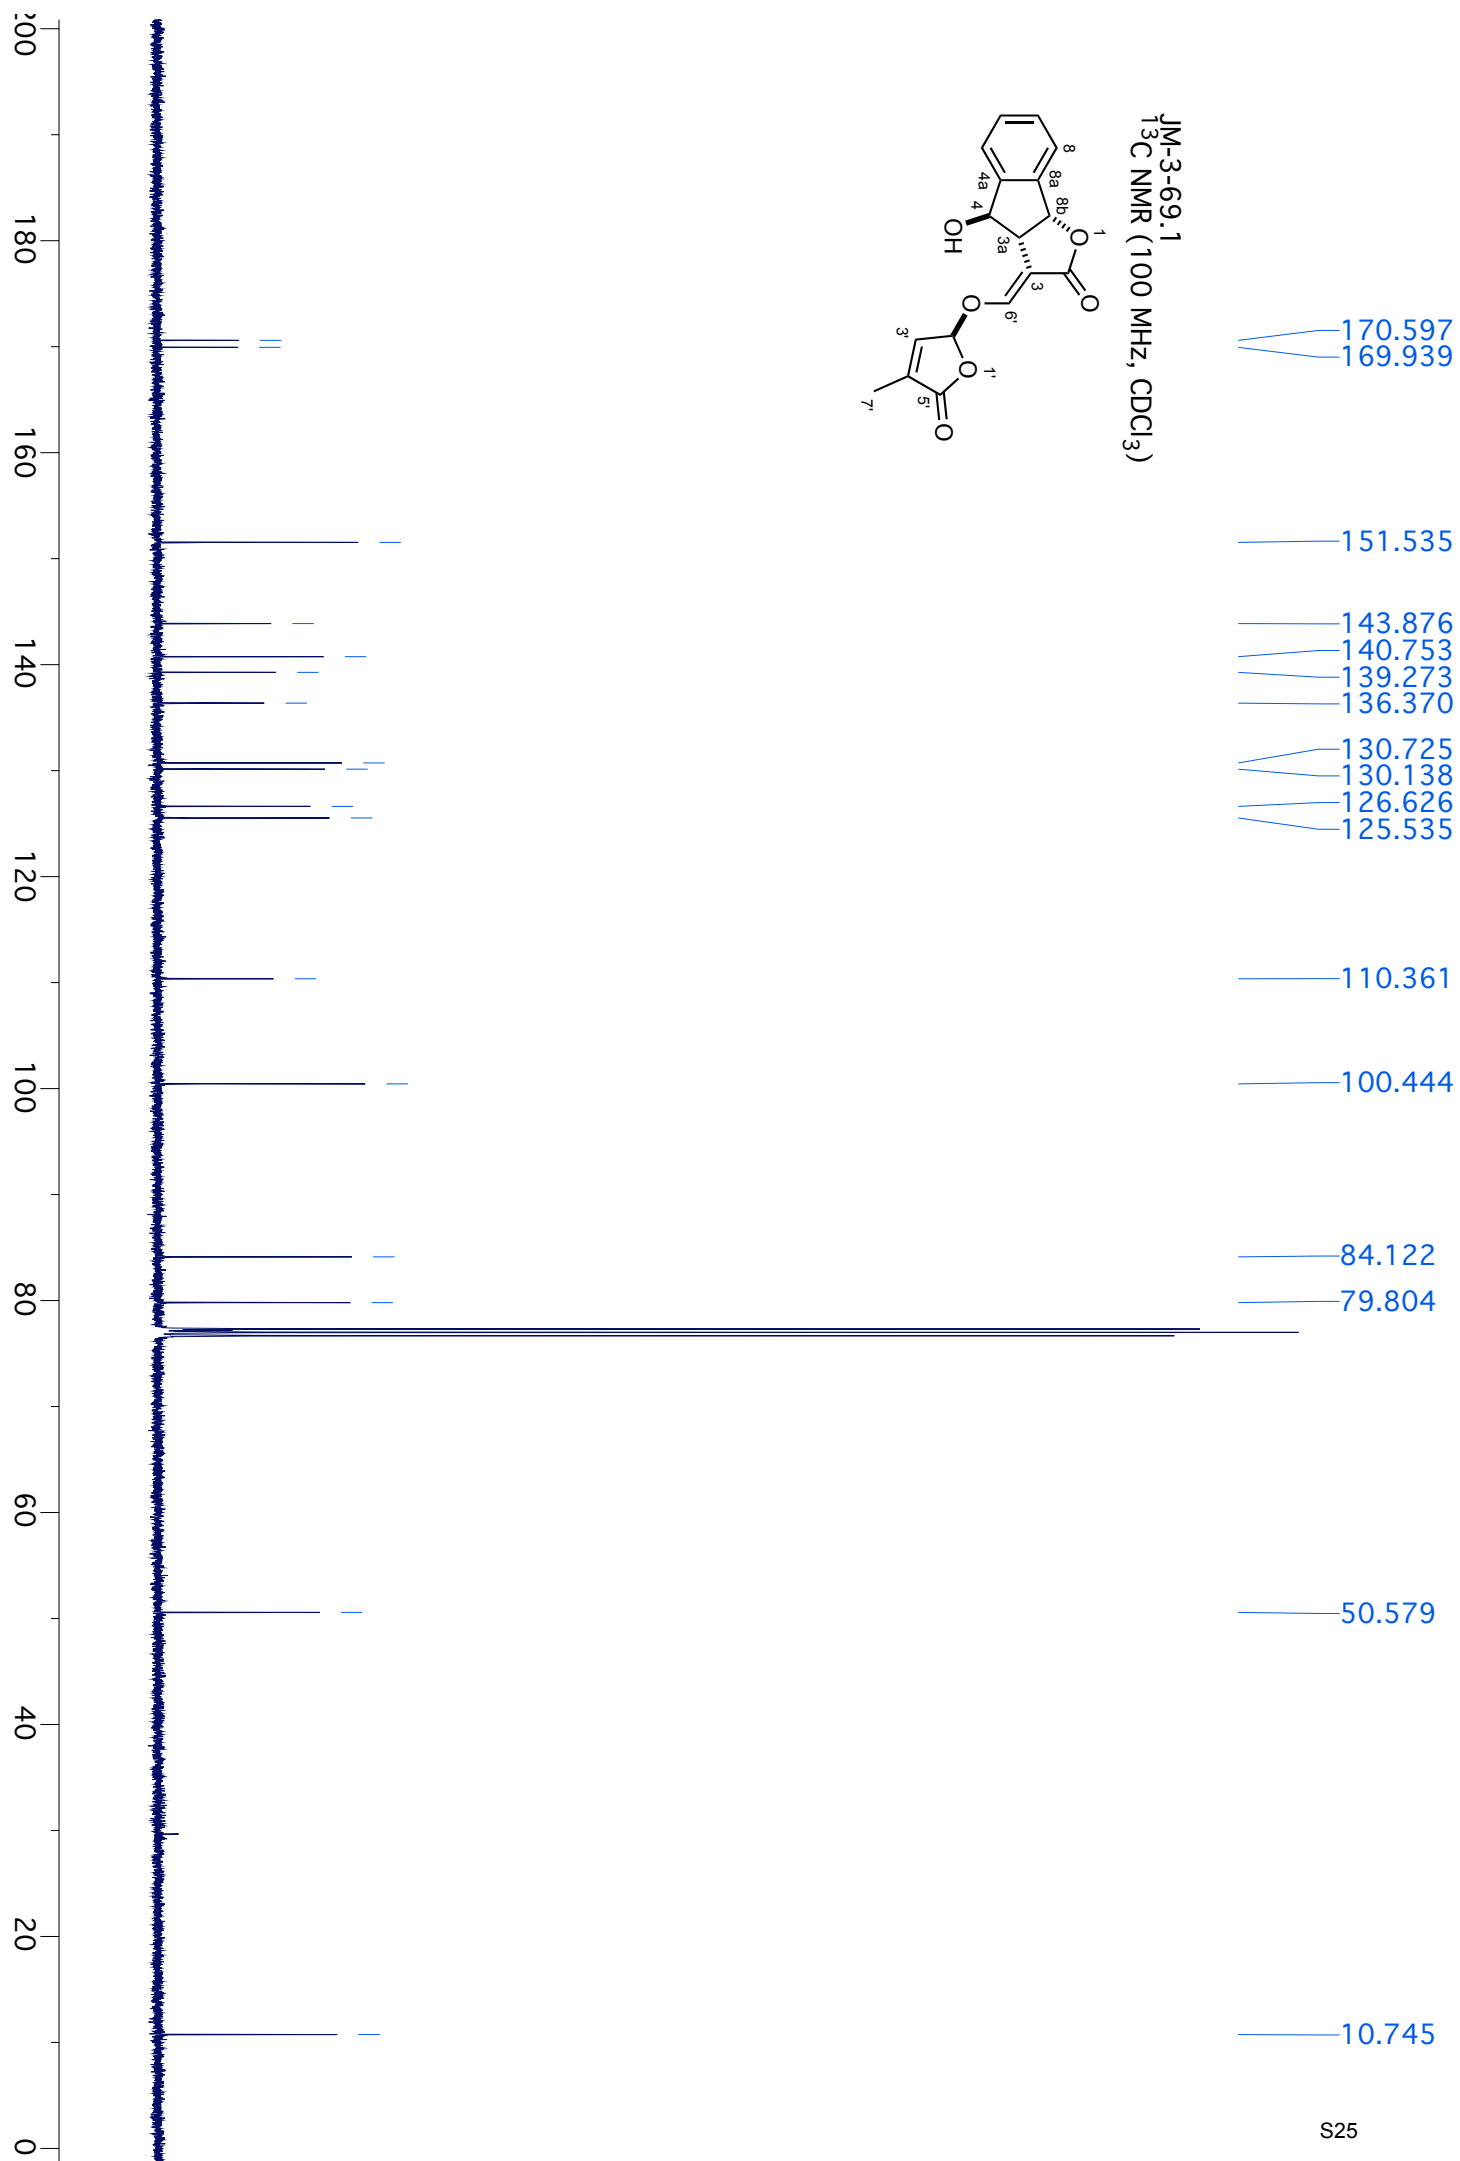

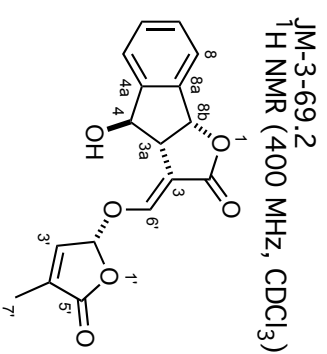

S26

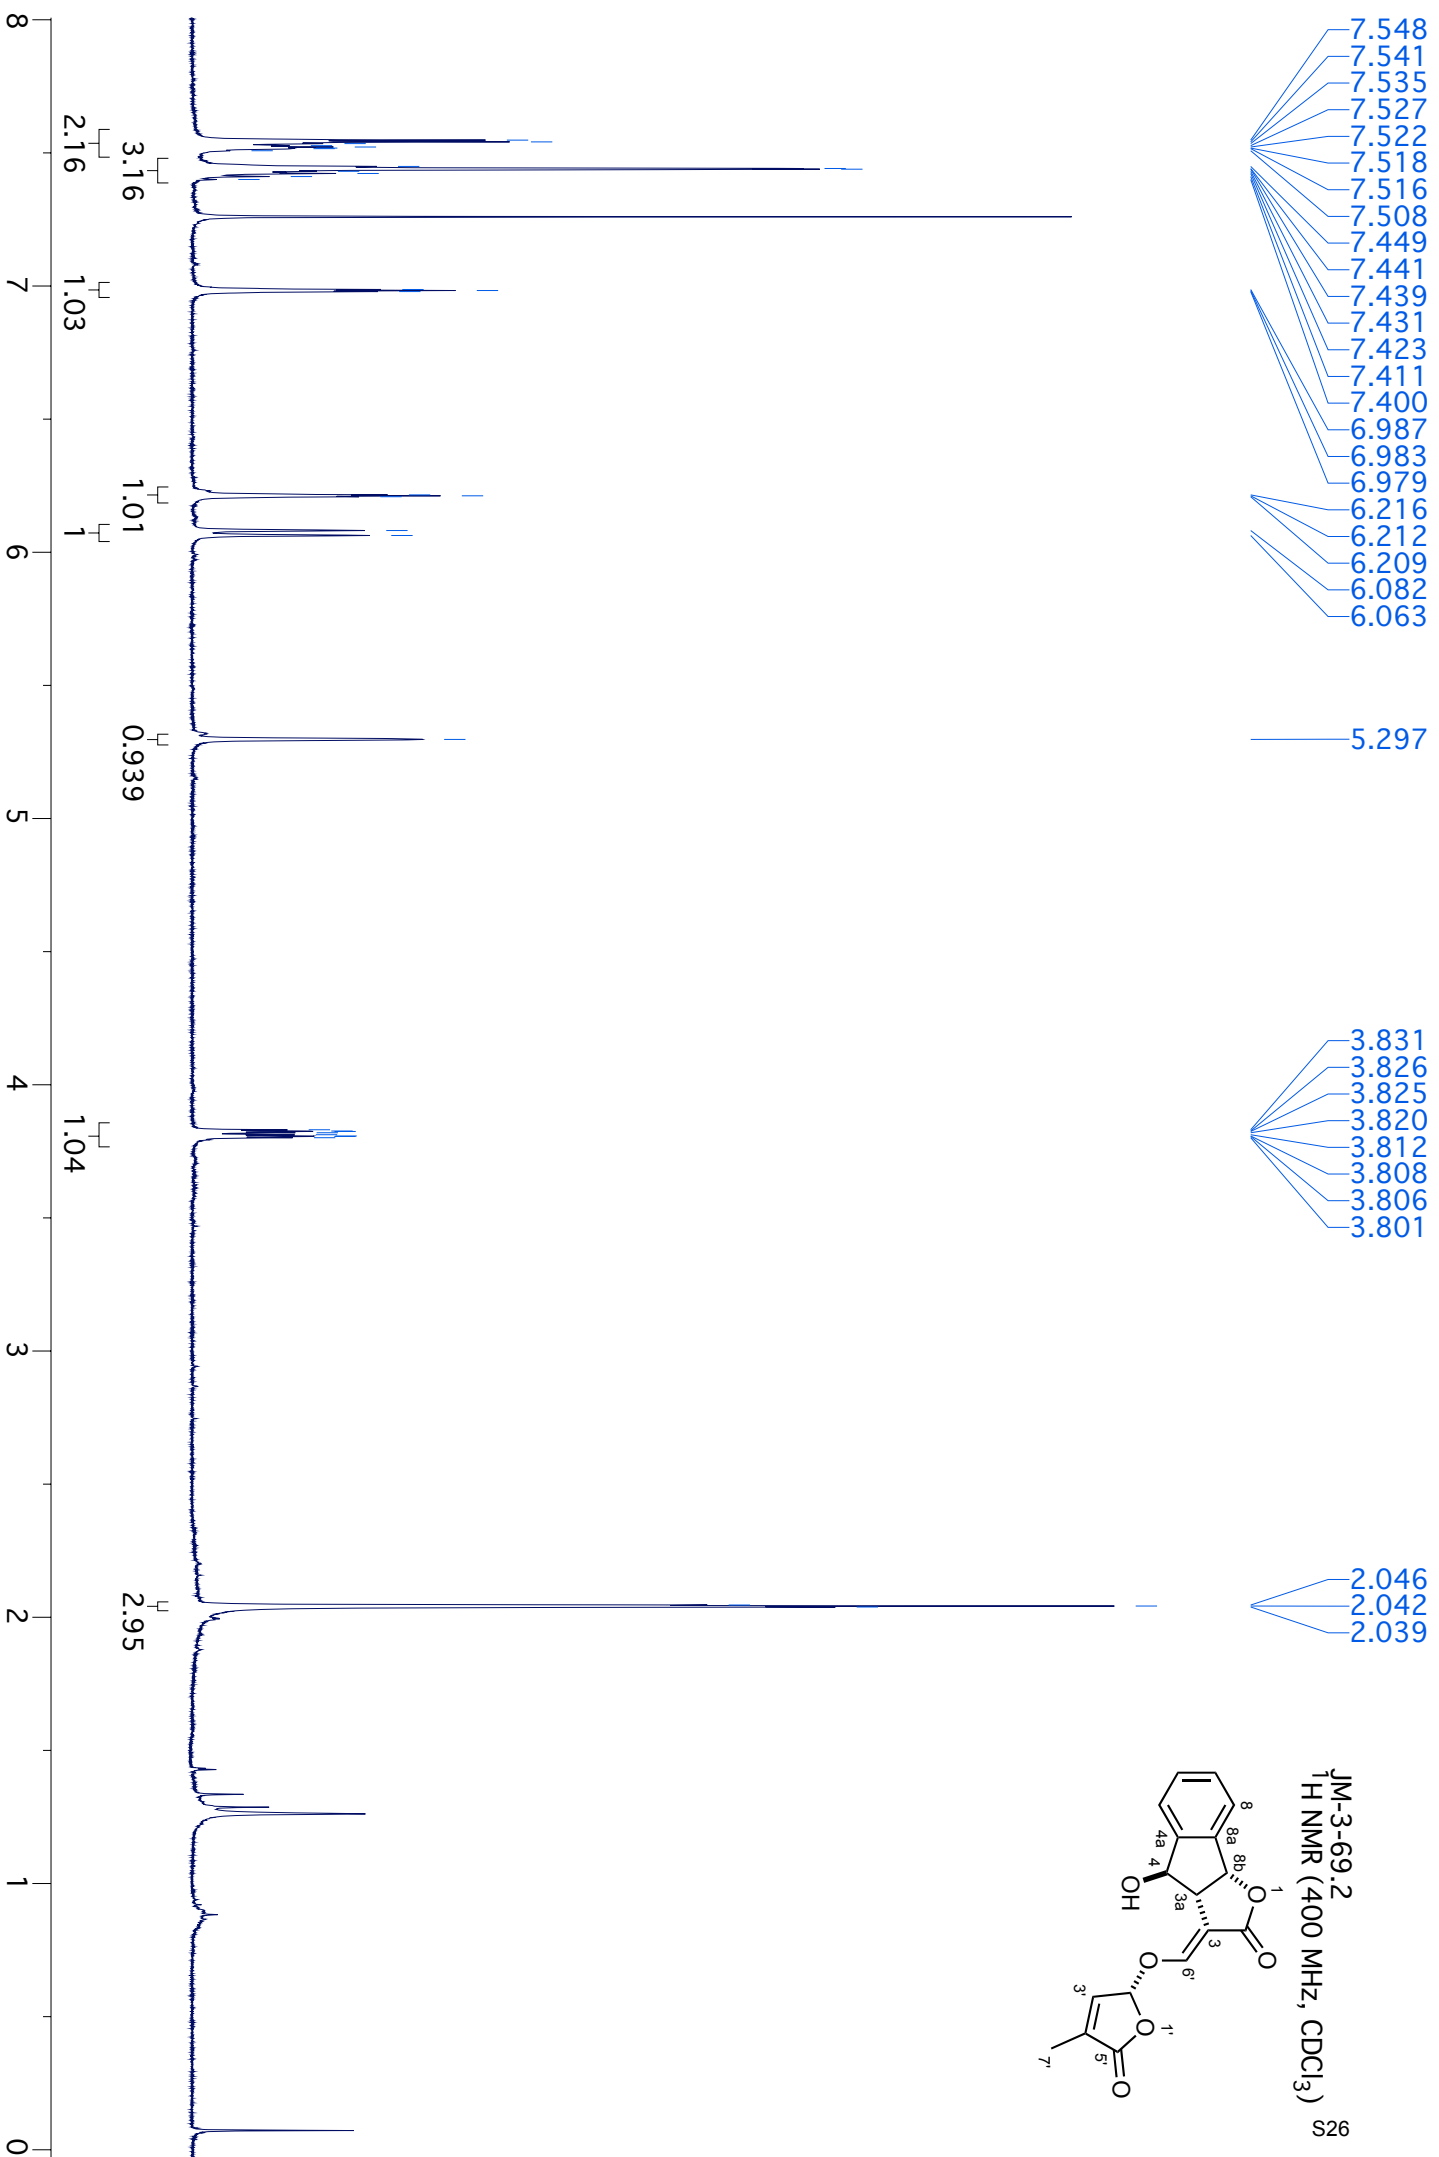



JM3-55.2  
<sup>1</sup>H NMR (400 MHz, CDCl<sub>3</sub>)

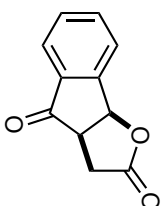

7.837  
 7.818  
 7.786  
 7.776  
 7.774  
 7.769  
 7.763  
 7.760  
 7.744  
 7.741  
 7.637  
 7.625  
 7.618  
 7.612  
 7.606  
 7.599  
 7.593  
 7.585

6.007  
 5.990

3.603  
 3.592  
 3.586  
 3.574  
 3.572  
 3.560  
 3.555  
 3.543  
 3.103  
 3.072  
 3.056  
 3.024  
 2.807  
 2.796  
 2.759  
 2.748

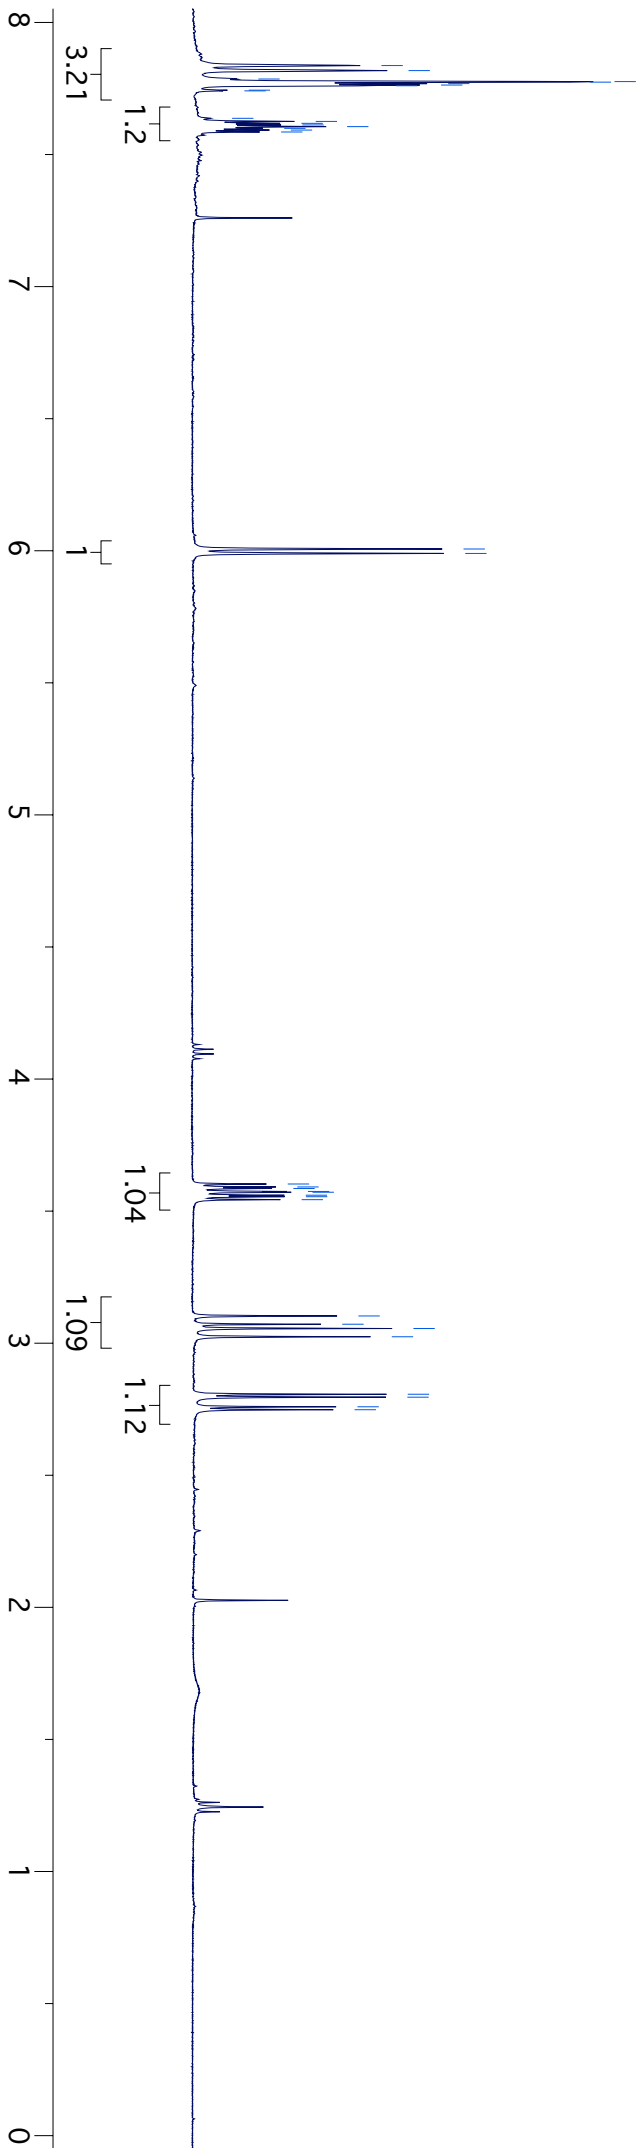

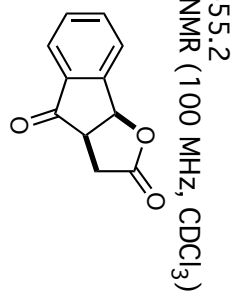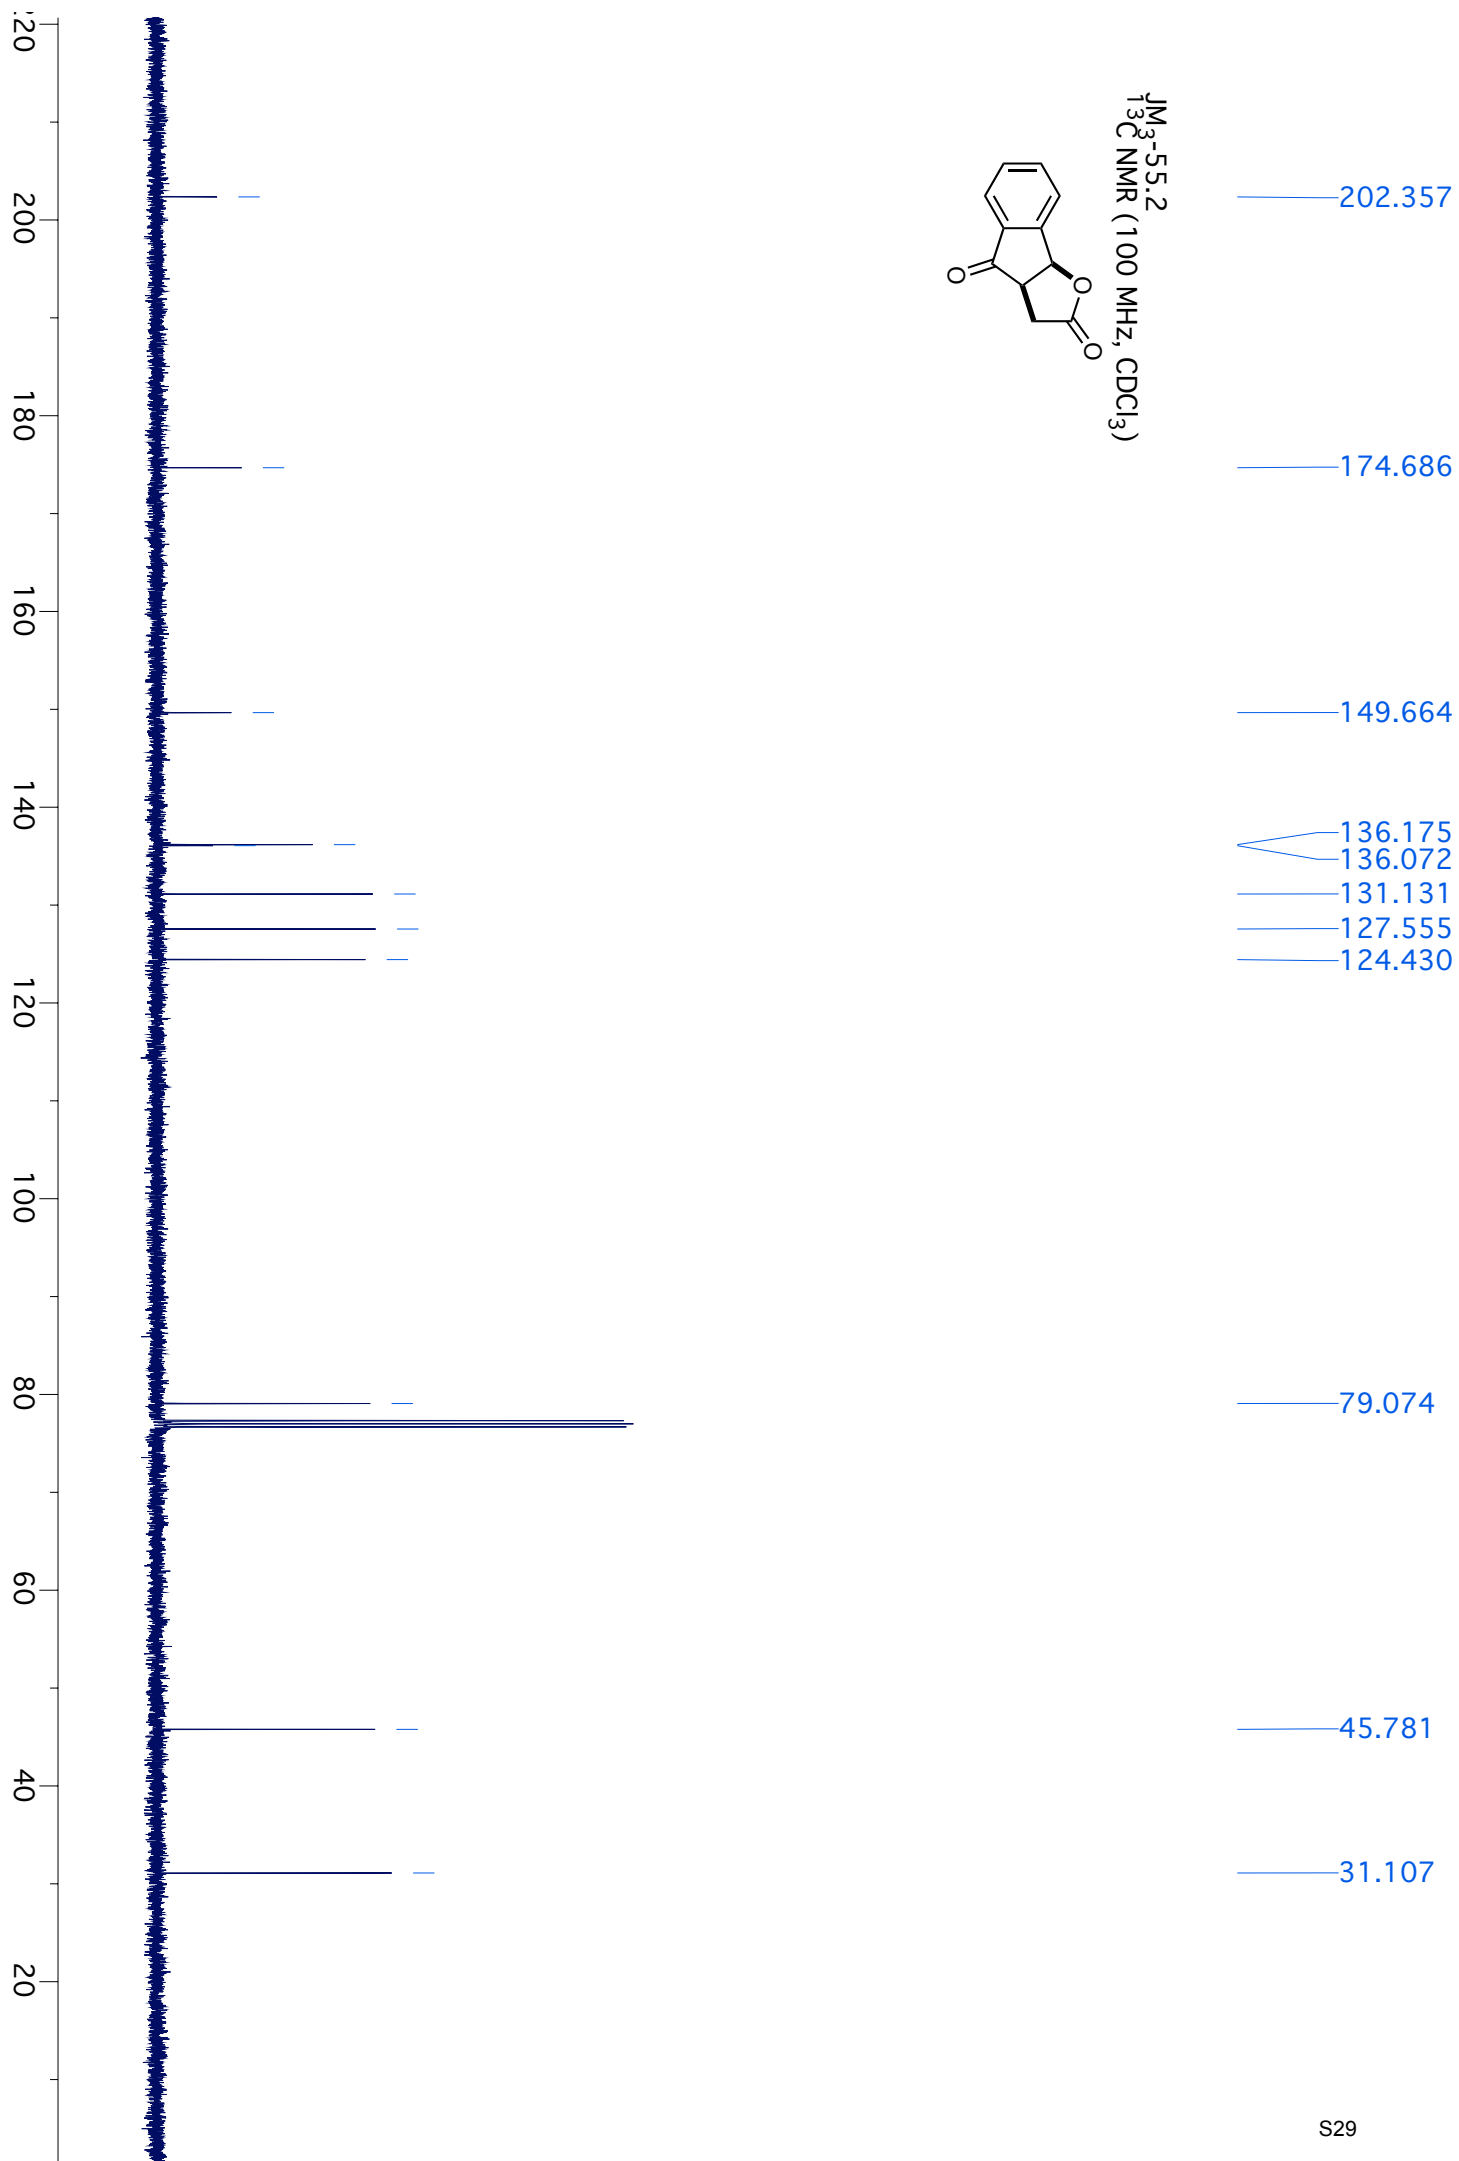

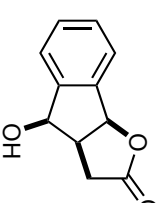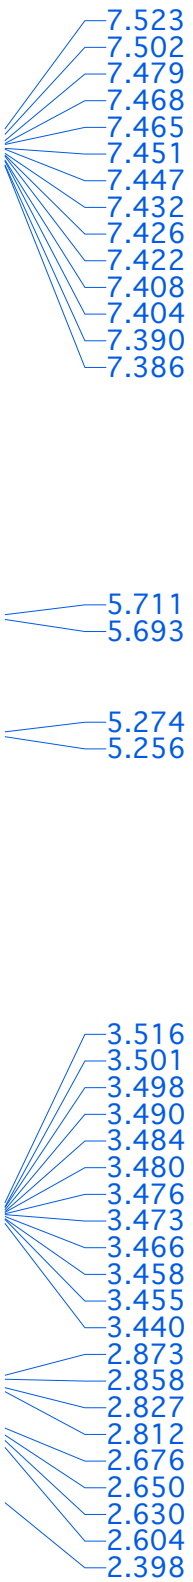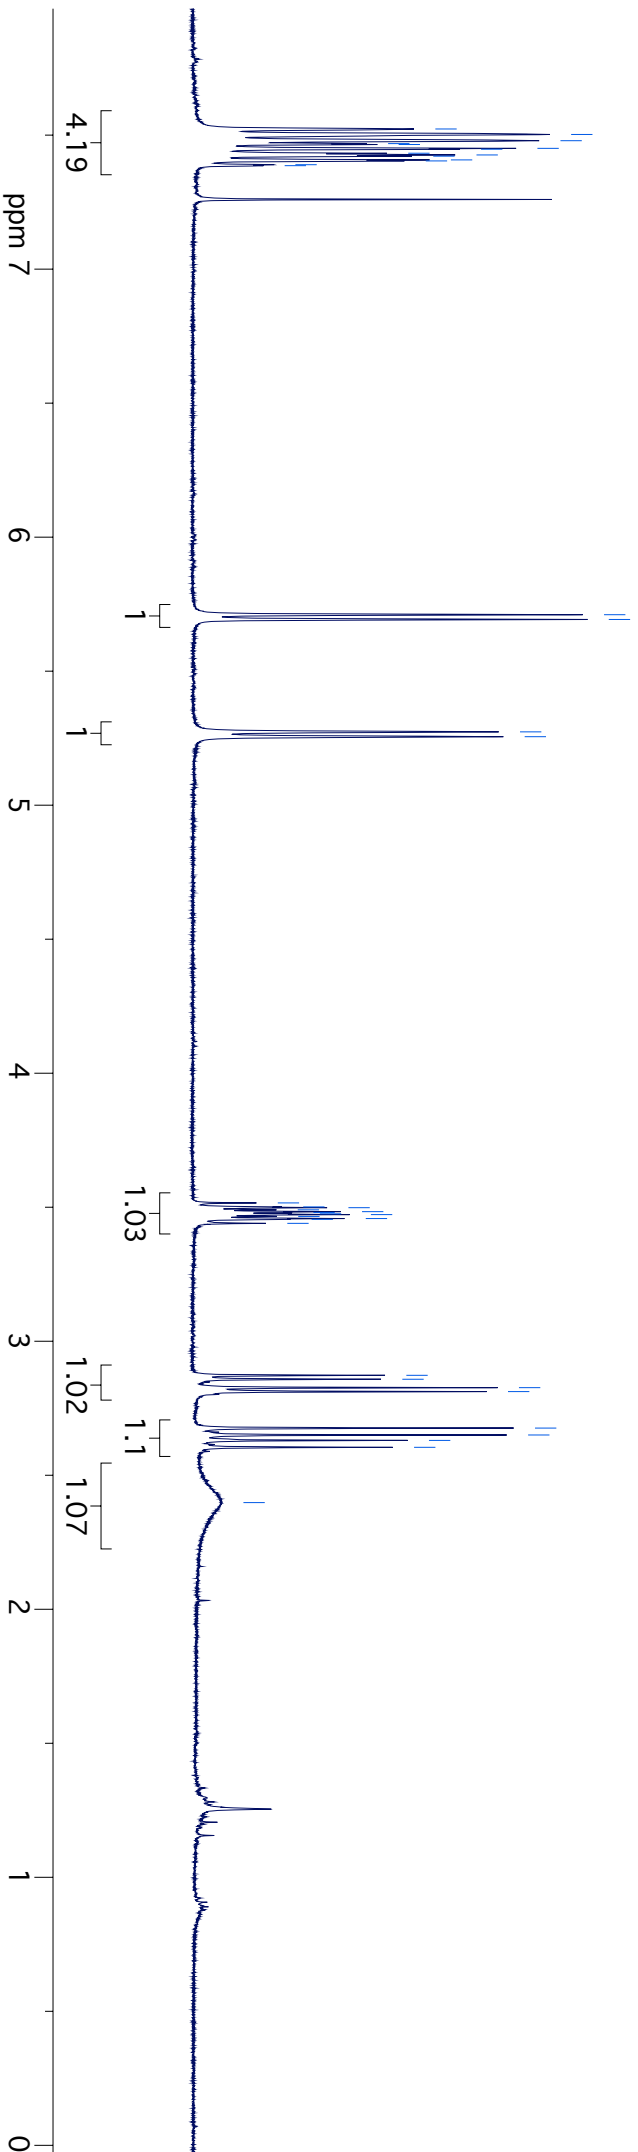

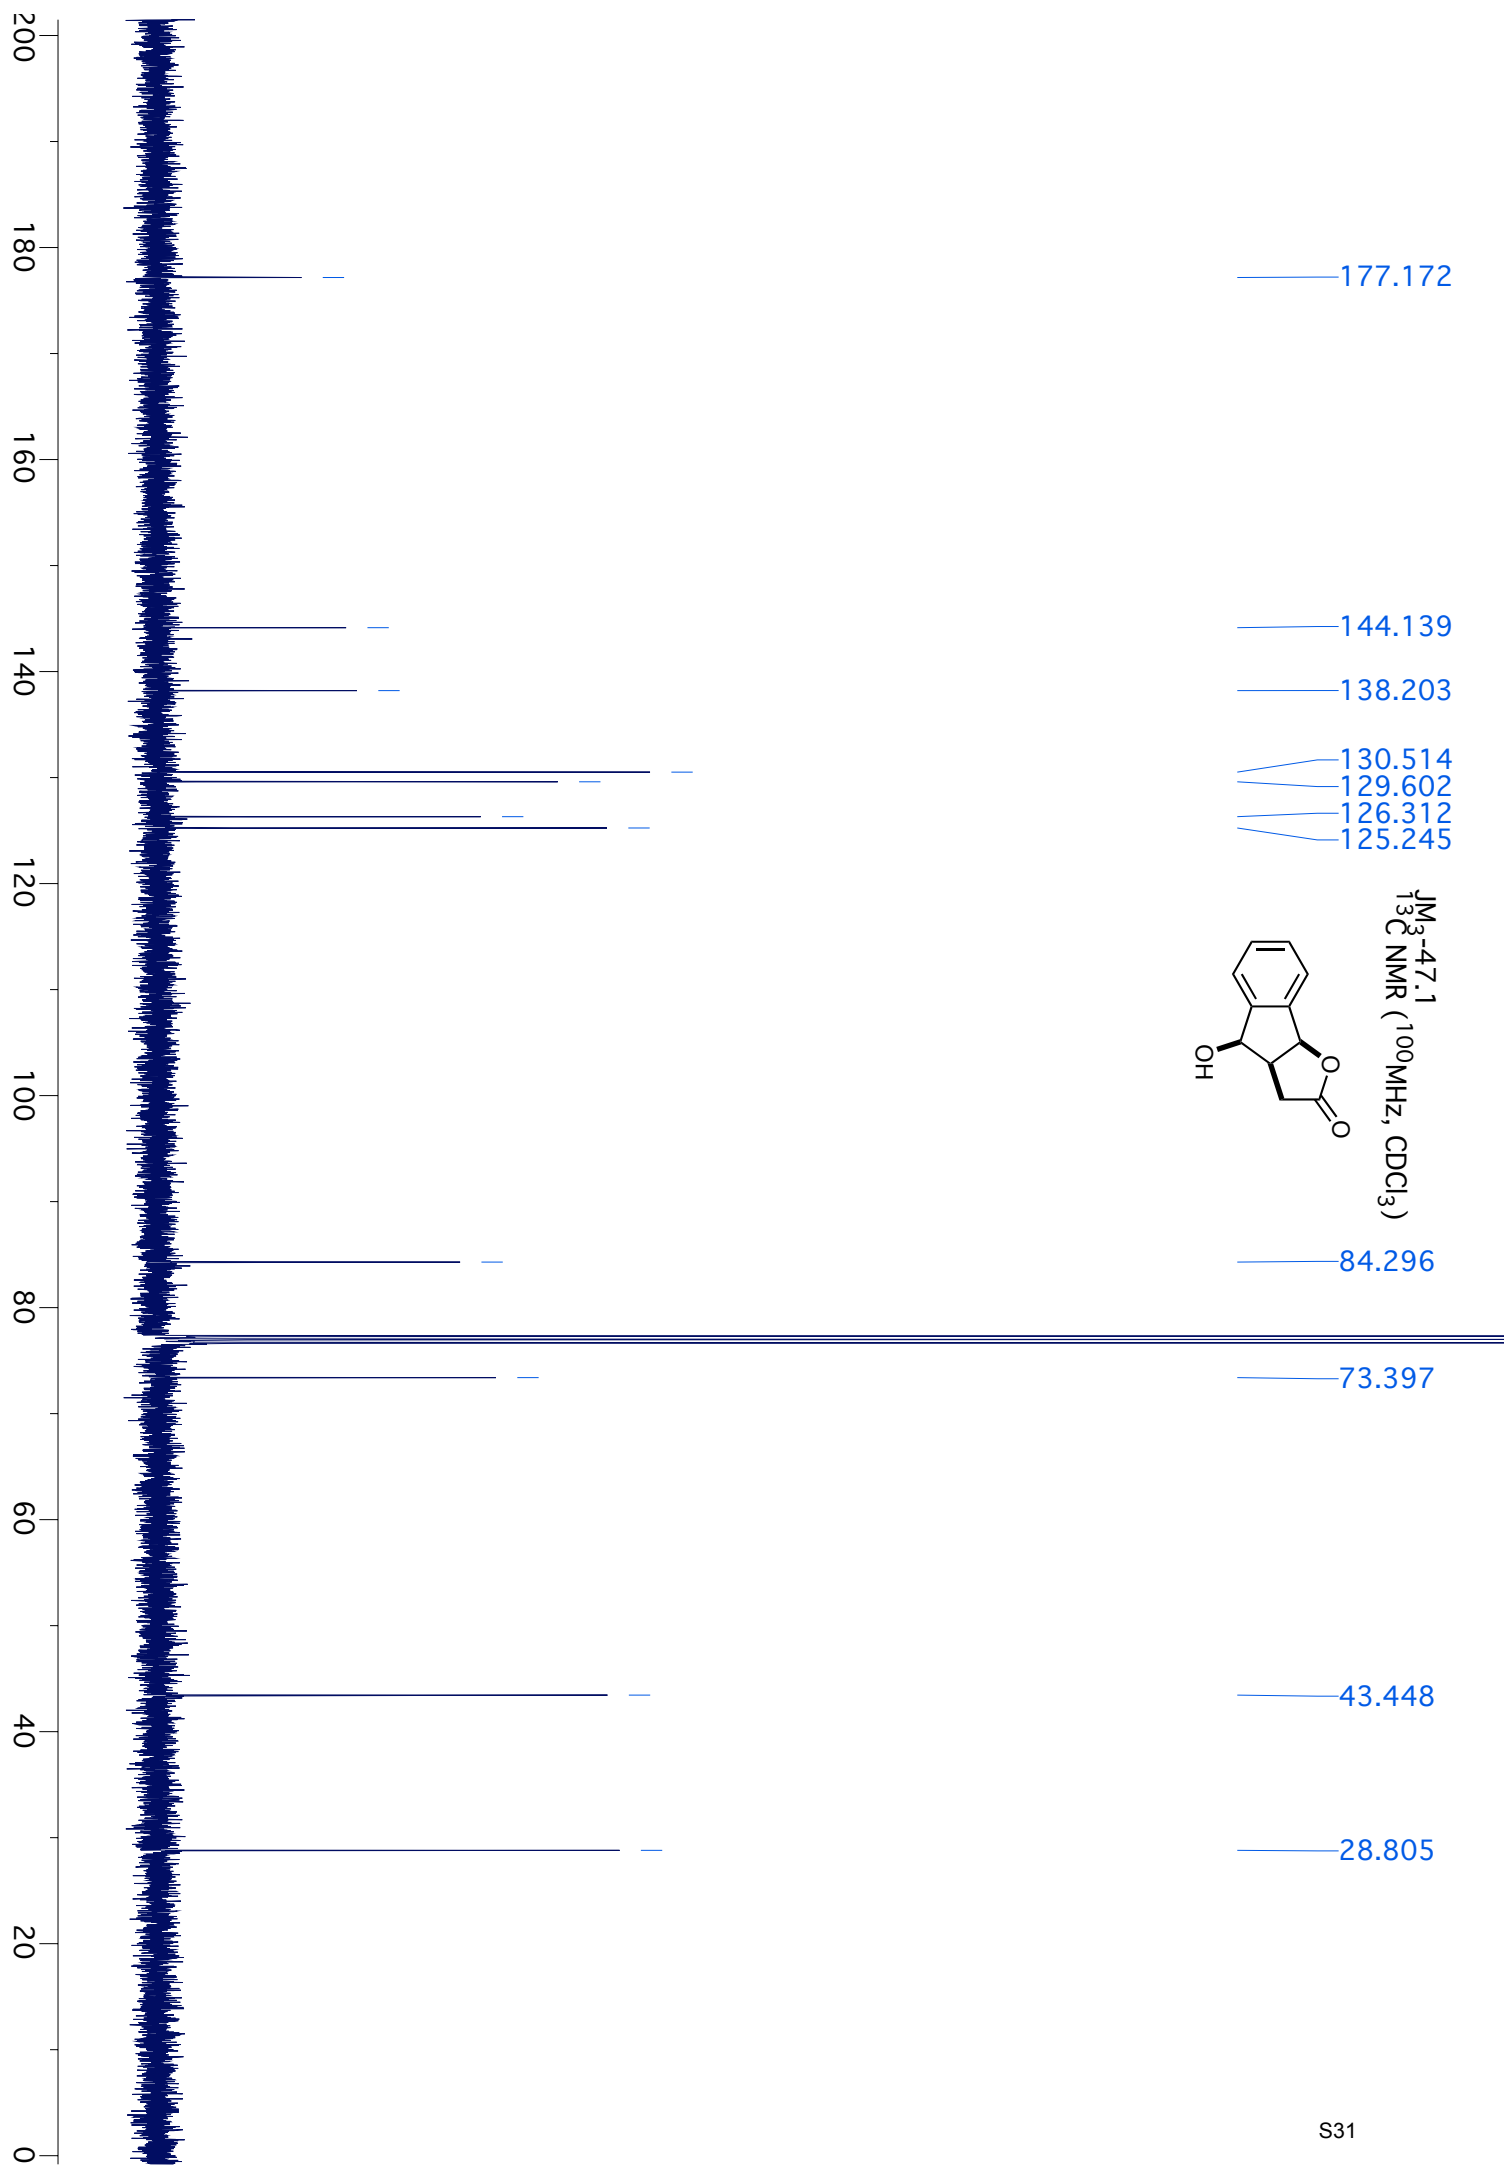

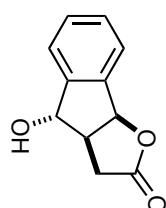

$J_{\text{M}} = 37.1$   
 $^1\text{H NMR}$  (400 MHz,  $\text{CDCl}_3$ )

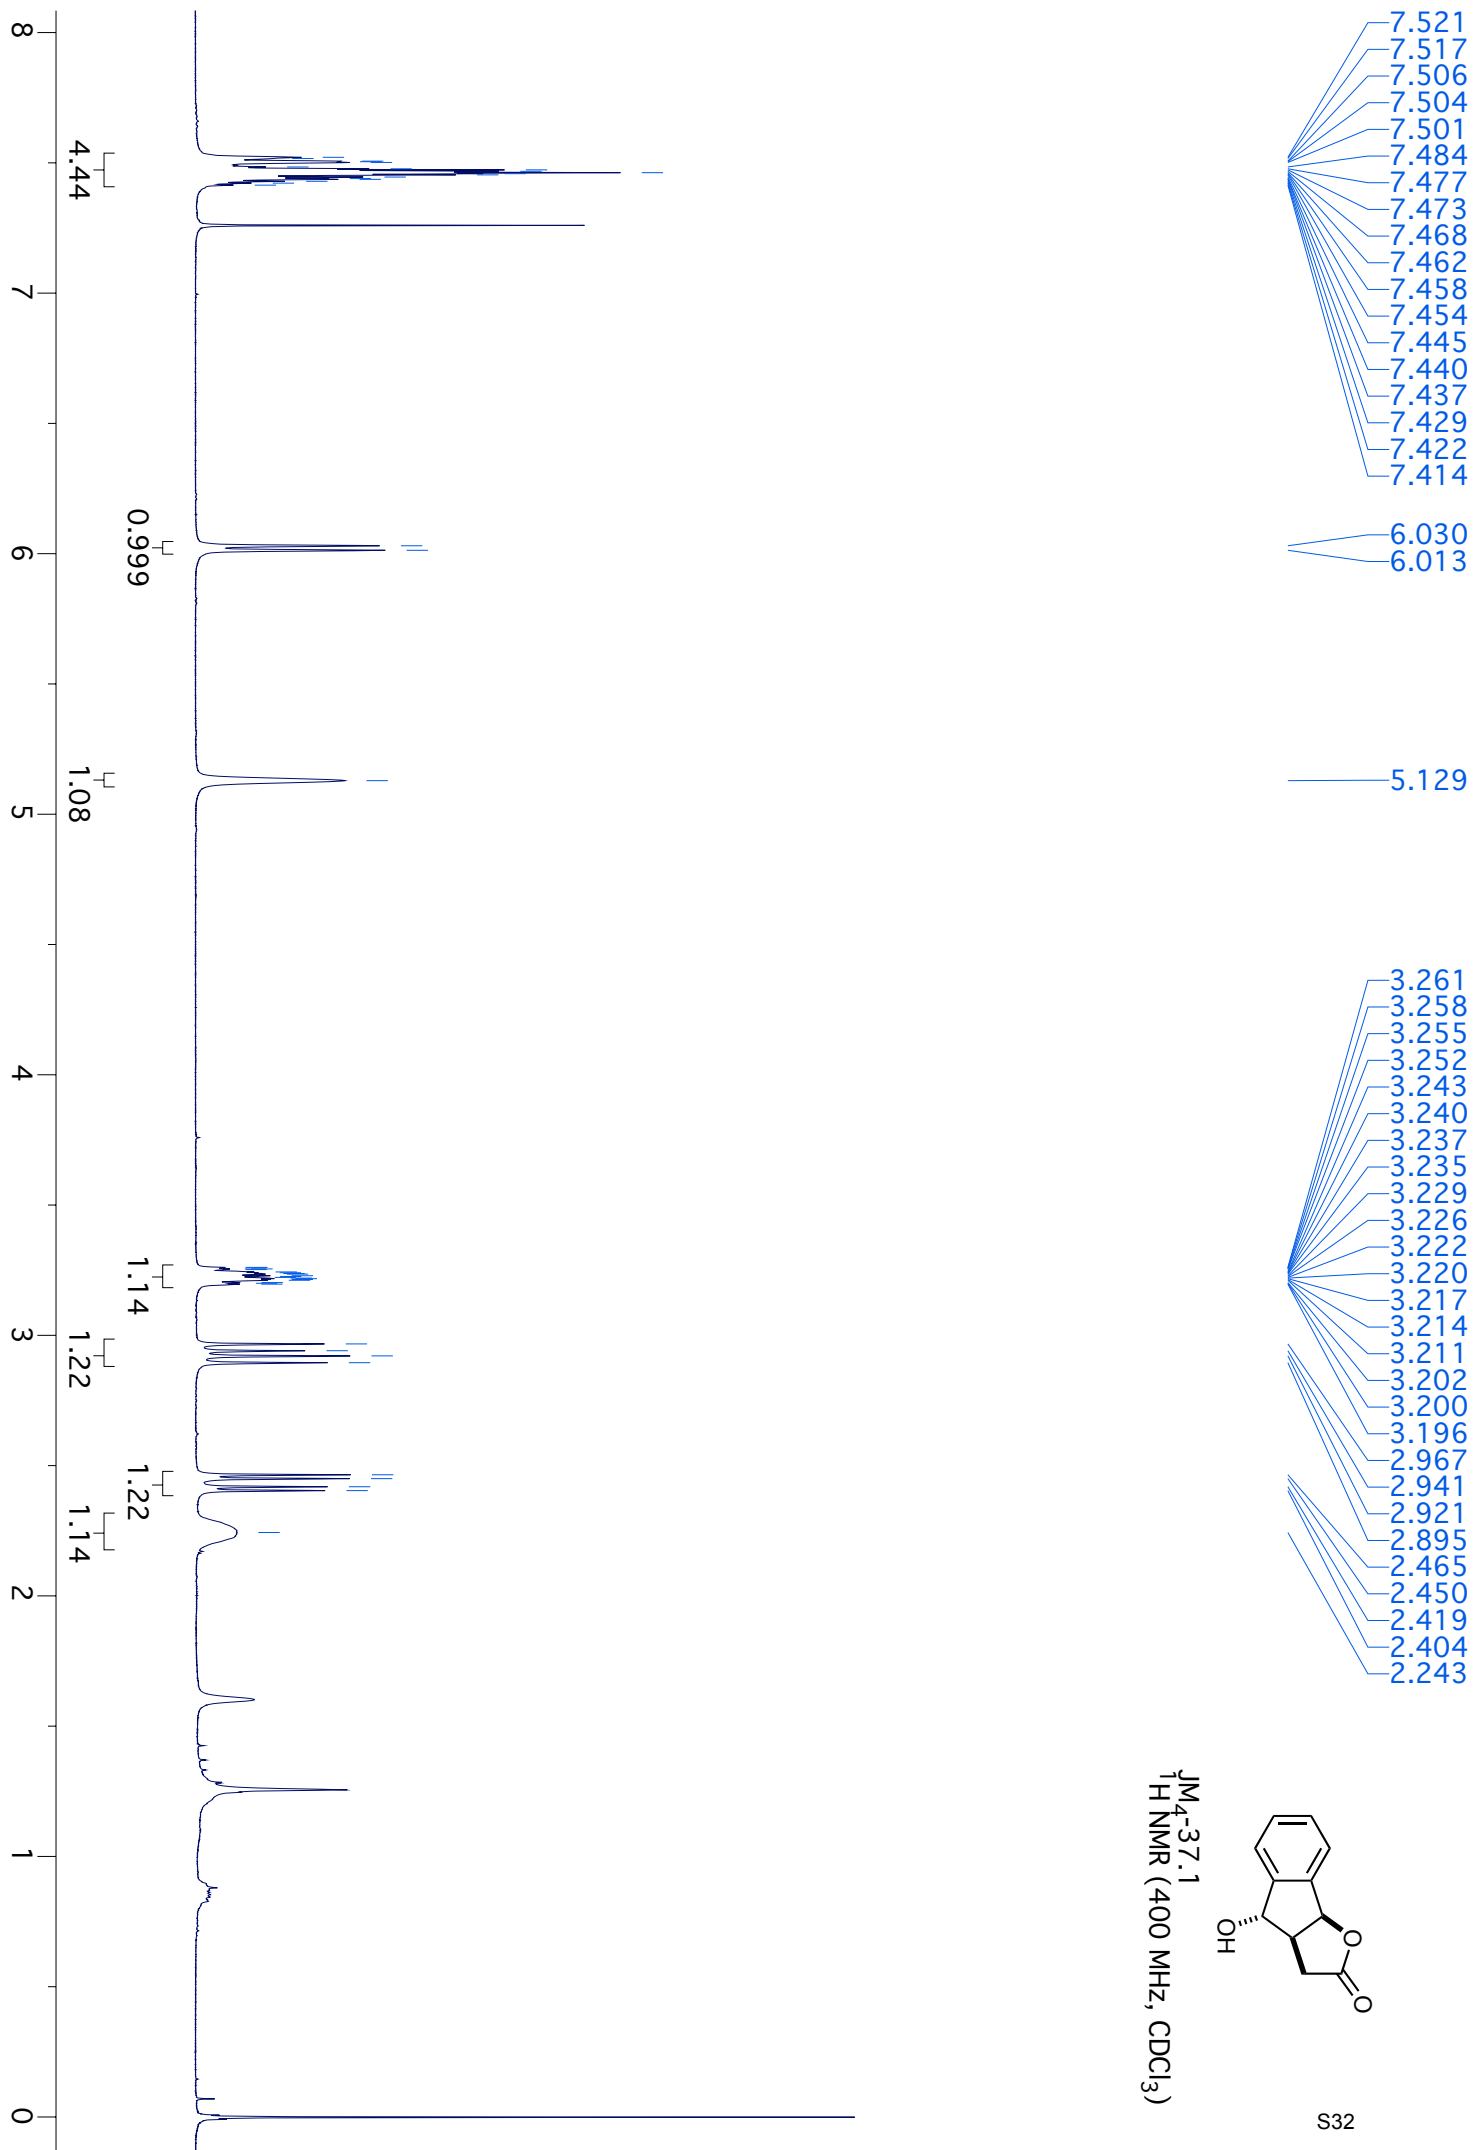



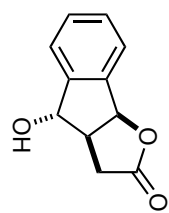

$^1J_{\text{MC}} = 75.1$   
 $^{13}\text{C}$  NMR (125 MHz,  $\text{CDCl}_3$ )

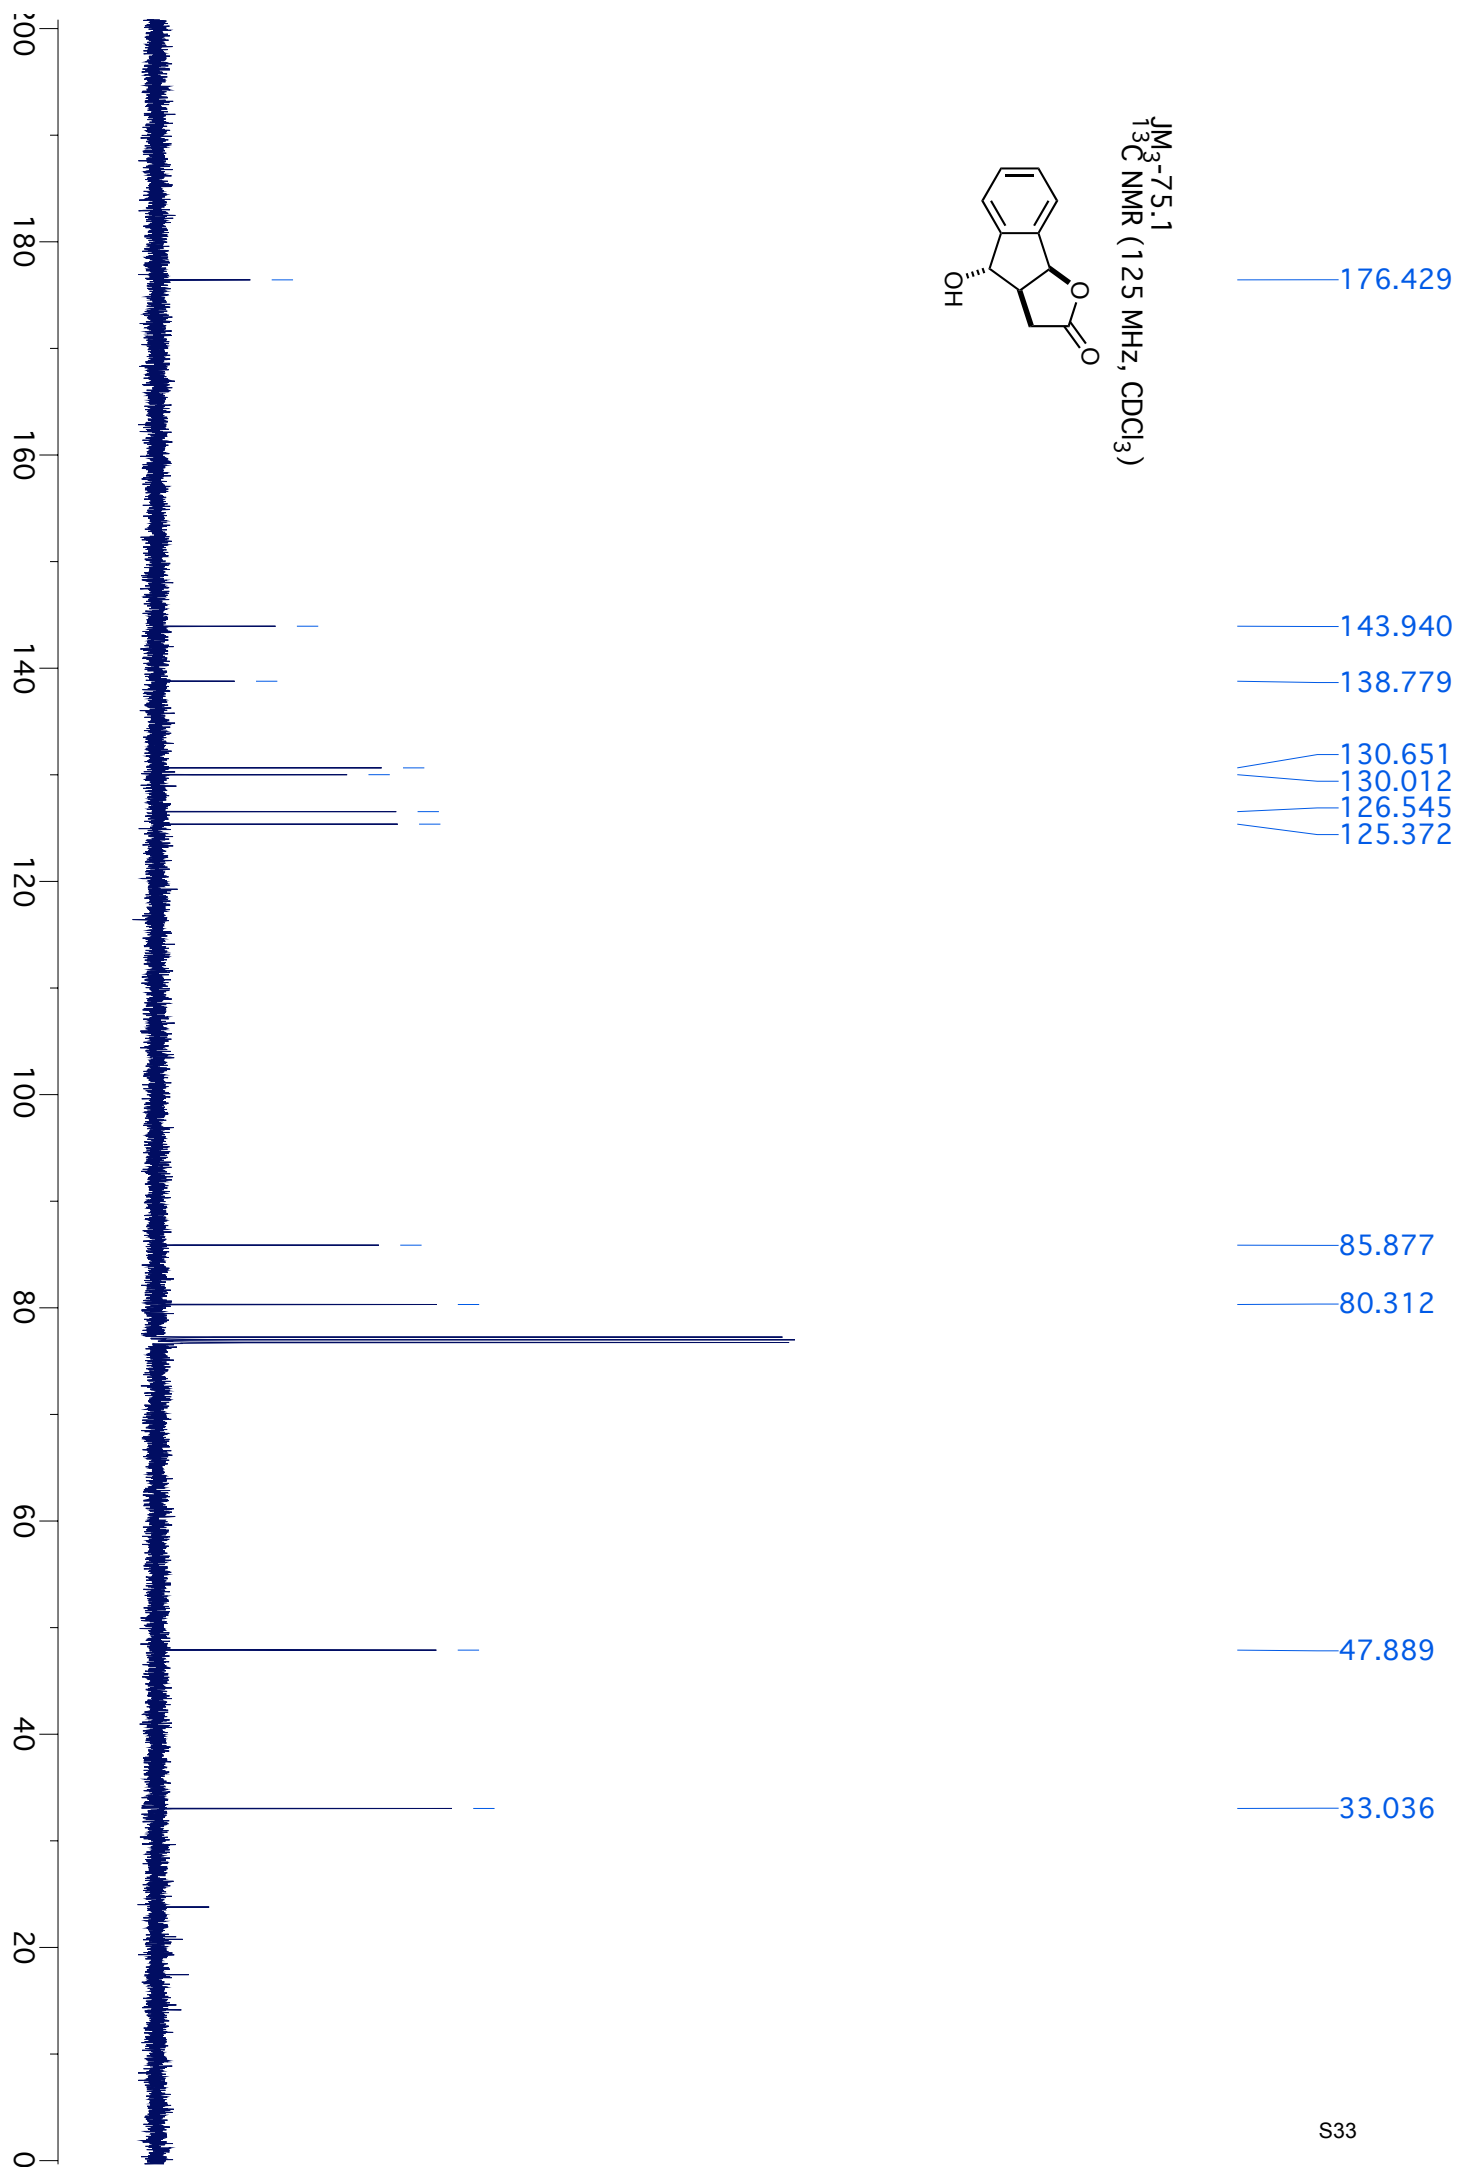

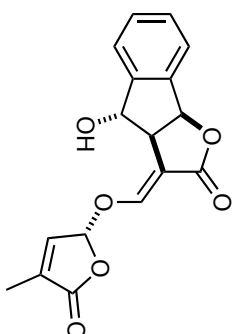

$^1\text{H}$  NMR (400 MHz,  $\text{CDCl}_3$ )

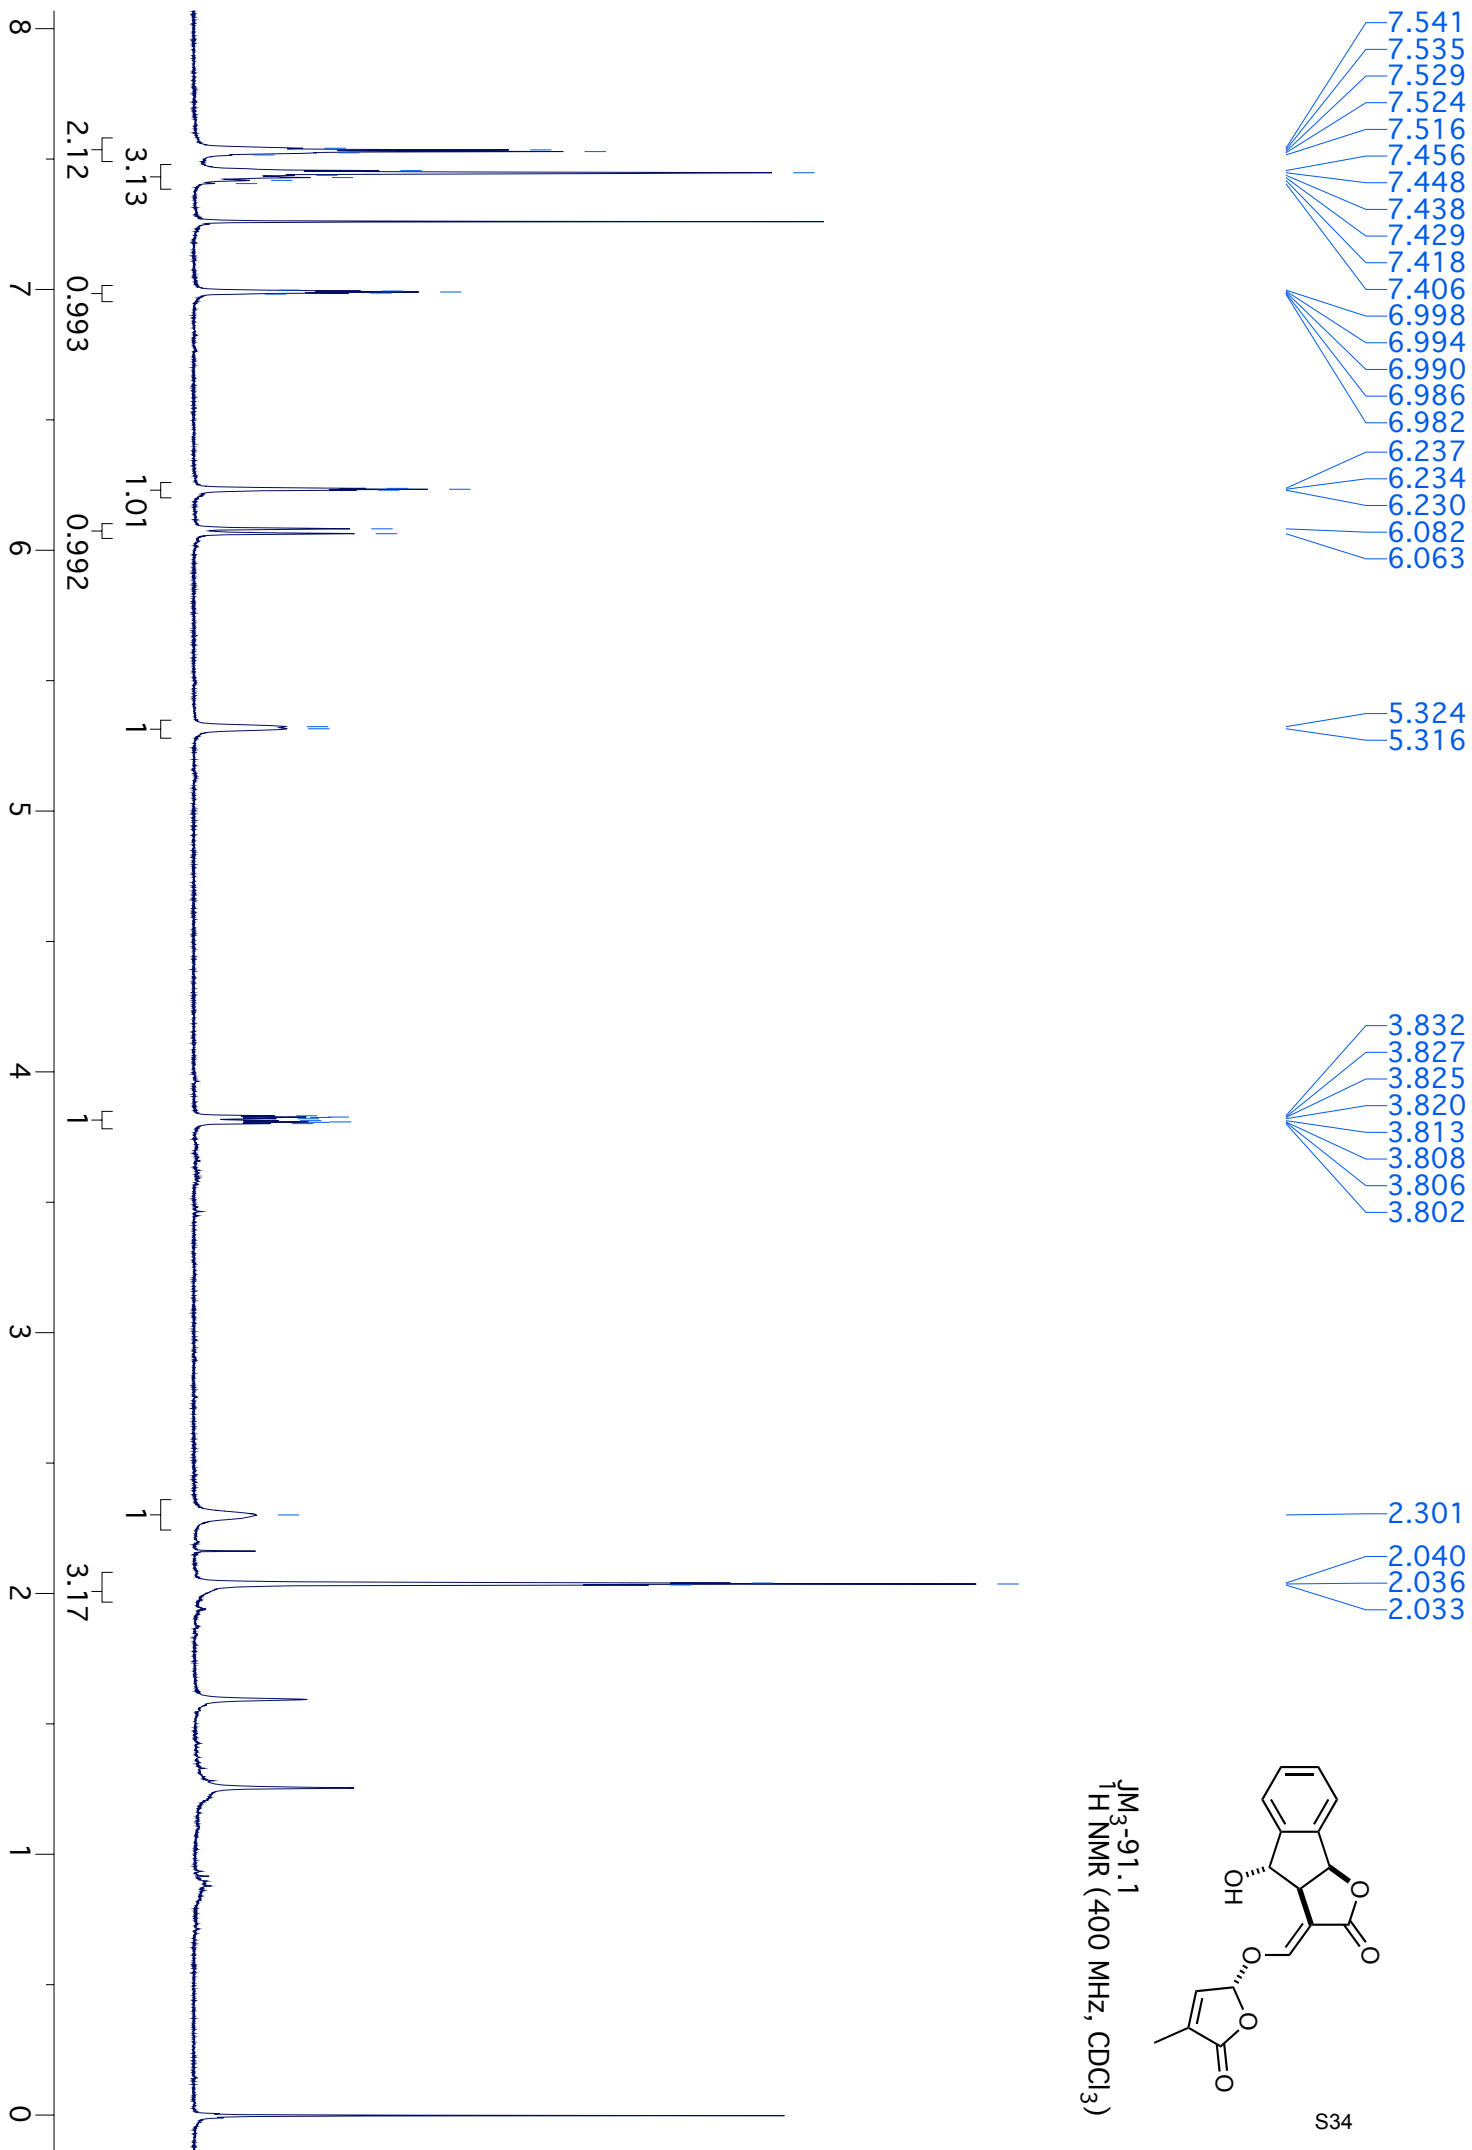

$\delta_{\text{M}} = 91.1$   
 $^{13}\text{C}$  NMR (100 MHz,  $\text{CDCl}_3$ )

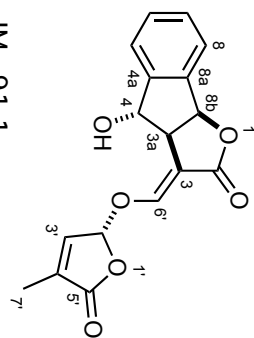

170.656  
 169.998

151.588

143.784  
 140.763  
 139.226  
 136.369

130.732  
 130.156  
 126.619  
 125.532

110.238

100.434

84.127

79.733

50.515

10.793

$^1\text{H}$  NMR (400 MHz,  $\text{CDCl}_3$ )

S36

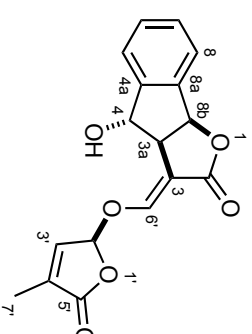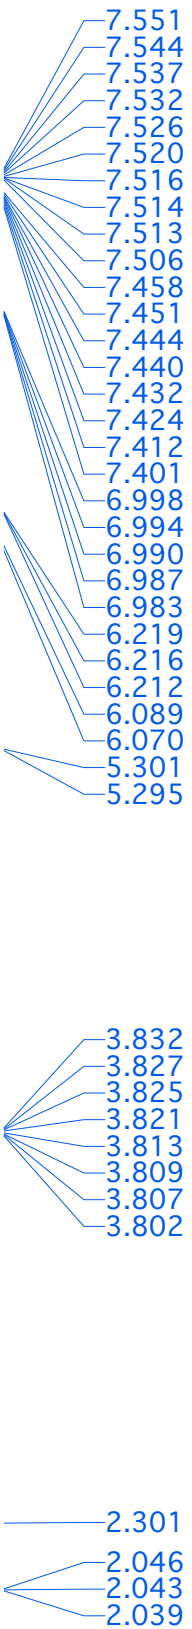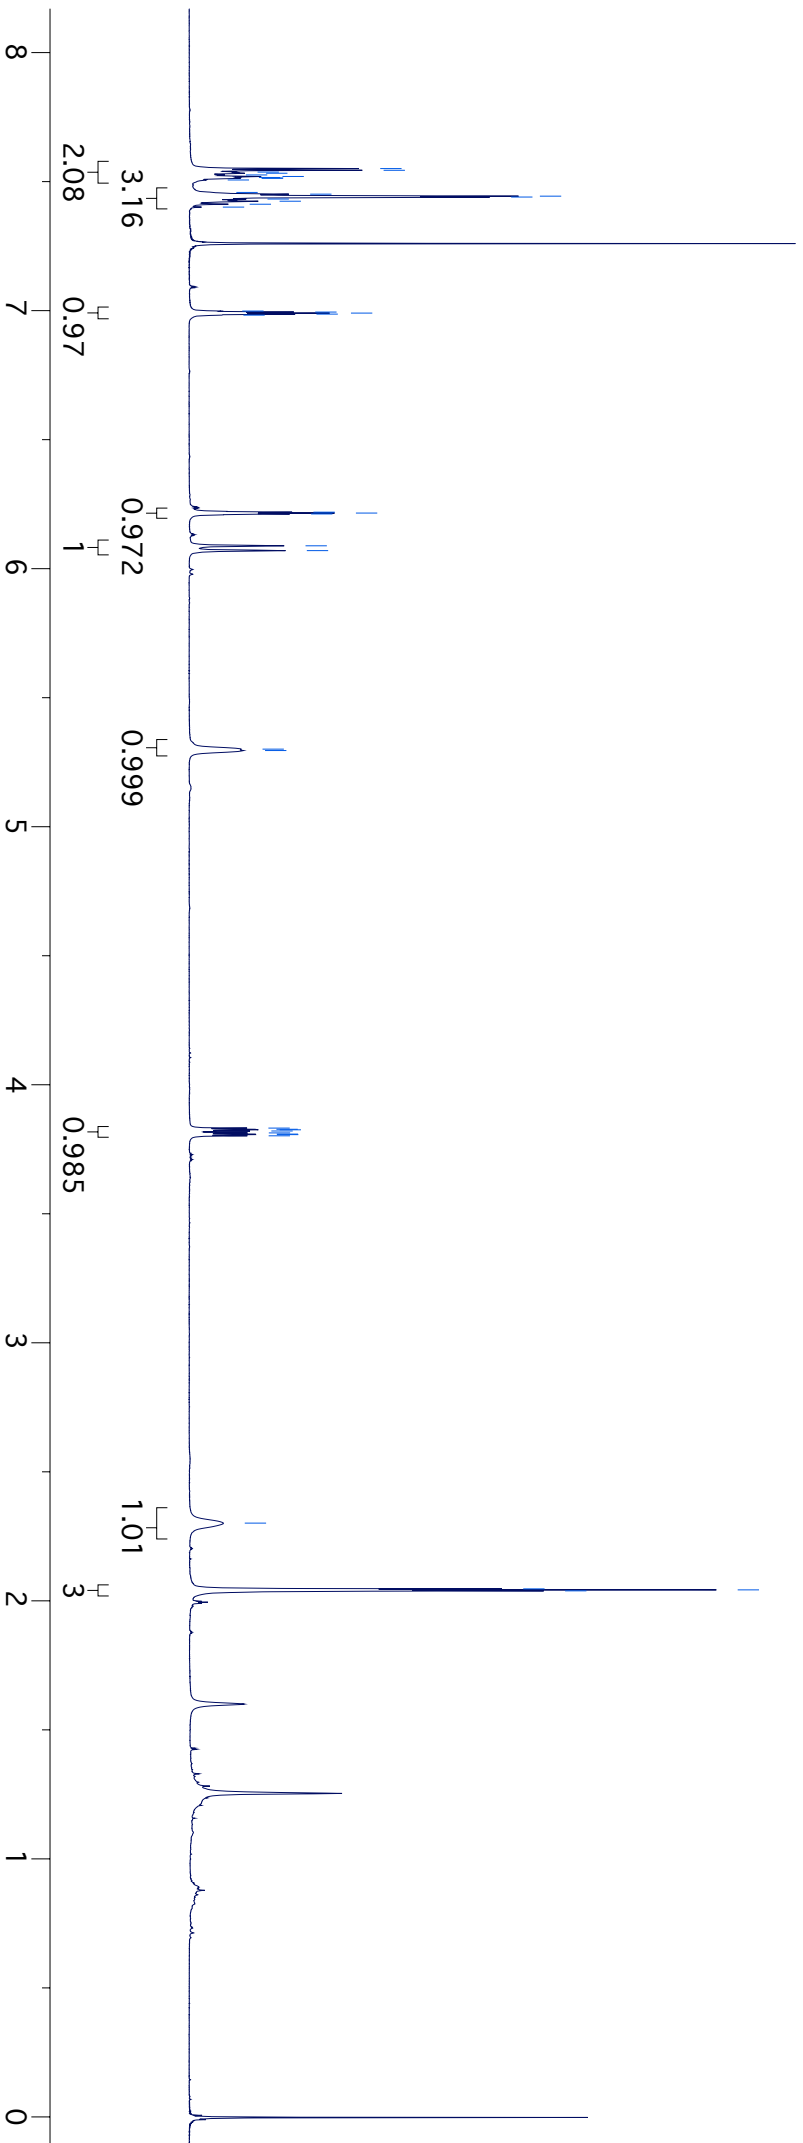

$J_{\text{M}_3-91.2}$   
 $^{13}\text{C}$  NMR (100 MHz,  $\text{CDCl}_3$ )

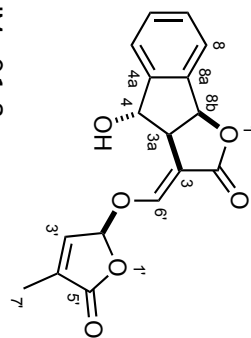

170.685  
 170.103

152.006

143.789

140.881

139.186

136.115

130.745

130.130

126.538

125.613

110.137

100.707

84.142

79.639

50.381

10.781
